# Supplementary material for: (Salen)Mn(iii)-catalyzed chemoselective acylazidation of olefins
Source: Royal Society of Chemistry journal article supplement (doi:10.1039/c8sc01882k), 2018-01-01
Supplement: c8sc01882k1.pdf [file c8sc01882k1.pdf]

## Supporting Information

### (Salen)Mn(III)-Catalyzed Chemoselective Acylazidation of Olefins

Liang Zhang, Shuya Liu, Zhiguo Zhao, Hongmei Su, Jingcheng Hao, and Yao Wang\*

School of Chemistry and Chemical Engineering, Key Laboratory of the Colloid and Interface Chemistry, Ministry of Education, Shandong University, Jinan 250100, China

Email: yaowang@sdu.edu.cn

#### Table of Contents:

|                                                                    |         |
|--------------------------------------------------------------------|---------|
| 1. General information .....                                       | S2      |
| 2. Preparation of substrates and catalysts.....                    | S2-S3   |
| 3. General procedure for acylazidation of olefinic compounds ..... | S3      |
| 4. Analytical data .....                                           | S4-S12  |
| 5. Mechanistic study.....                                          | S12-S15 |
| 6. X-ray crystallographic data.....                                | S16     |
| 7. Copies of NMR spectra.....                                      | S16-S62 |
| 8. HPLC trace of <b>3a</b> and <b>3d</b> .....                     | S63-S64 |
| 9. References.....                                                 | S65     |

## 1. General Information

All the chemicals were either purchased from commercial suppliers or purified by standard procedures as specified in *Purification of Laboratory Chemicals*, 4th Ed (Armarego, W. L. F.; Perrin, D. D. Butterworth Heinemann: 1997). All reactions were carried out under nitrogen atmosphere. Optically pure catalyst **C7** was purchased from Sigma-Aldrich: product number 404446, CAS Number: 138124-32-0. Analytical thin-layer chromatography (TLC) was performed on silica gel plates and analyzed by UV light or by potassium permanganate stains followed by heating. Flash chromatography was carried out utilizing silica gel (200-300 mesh). <sup>1</sup>H NMR, <sup>13</sup>C NMR spectra were recorded in CDCl<sub>3</sub> at room temperature on a Bruker AM-400 spectrometer (400MHz <sup>1</sup>H, 100MHz <sup>13</sup>C). The chemical shifts are reported in ppm relative to either the residual solvent peak (<sup>13</sup>C) (δ = 77 ppm) or TMS (<sup>1</sup>H) (δ = 0 ppm) as an internal standard. Data for <sup>1</sup>H NMR are reported as follows: chemical shift (δ ppm), multiplicity (s = singlet, d = doublet, t = triplet, m = multiplet, dd = doublet doublet), coupling constant (Hz), integration. Data for <sup>13</sup>C NMR are reported as chemical shift. HRMS were performed on a Bruker Apex II mass instrument (ESI).

## 2. Preparation of the substrates and catalysts

The substrates **1q**, **1s** were prepared according to the literature procedure as reported by Liwosz.<sup>[1]</sup> The substrates **1aa–1an** were prepared according to the literature procedure.<sup>[2-4]</sup> The substrate vinylstrone **4a'** was prepared according to the literature procedure.<sup>[5-6]</sup> The substrate **1u** was prepared according to the literature procedure.<sup>[7]</sup> (salen)Mn(III) complexes were prepared according to the literature procedure.<sup>[8-9]</sup>

The substrates **4b'**, **5a'**, and **5b'** were prepared according to the similar methods as reported by literature procedure.<sup>[10-11]</sup>

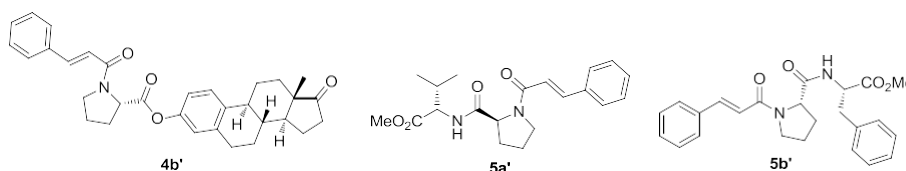

The preparation of **4b'**:

*N*-(3-dimethylaminopropyl)-*N'*-ethylcarbodiimide hydrochloride (920.0 mg, 4.8 mmol, 1.20 equiv) was added to a suspension of (*S*)-1-cinnamoylpyrrolidine-2-carboxylic acid (981.0 mg, 4.0 mmol, 1.0 equiv), estrone (1081.0 mg, 4.0 mmol, 1.0 equiv), and 4-dimethylaminopyridine (147.0 mg, 1.2 mmol, 0.3 equiv) in dry CH<sub>2</sub>Cl<sub>2</sub> (40.0 mL), and then the reaction mixture was stirred at 23 °C for 15 h. The reaction mixture was then concentrated in vacuum and the residue was purified by chromatography on silica gel, eluting with CH<sub>2</sub>Cl<sub>2</sub>:CH<sub>3</sub>OH (400:1 to 100:1 (v/v)), to afford **4b'** as a white solid (1295.0 mg, 2.6 mmol, 65% yield). <sup>1</sup>H NMR (400 MHz, CDCl<sub>3</sub>): δ 7.77 (d, *J* = 15.5 Hz, 1H), 7.50-7.61 (m, 2H), 7.34-7.43 (m, 3H), 7.24-7.30 (m, 1H), 6.85-6.99 (m, 2H), 6.78 (d, *J* = 15.5 Hz, 1H), 4.81 (dd, *J* = 3.9, 8.4 Hz, 1H), 3.87-3.96 (m, 1H), 3.74-3.82 (m, 1H), 2.85-3.03 (m, 2H), 2.46-2.56 (m, 1H), 2.34-2.49 (m, 2H), 2.18-2.33 (m, 3H), 1.93-2.61 (m, 5H), 1.38-1.66 (m, 6H), 0.91 (s, 3H); <sup>13</sup>C NMR (100 MHz, CDCl<sub>3</sub>): δ 220.7, 171.1, 165.0, 148.6, 142.9, 137.9, 137.3, 135.1, 129.8, 128.8, 127.9, 126.2, 121.5, 118.6, 117.9, 59.3, 50.4, 47.9, 47.0, 44.1, 38.0, 35.8, 31.5, 29.3, 29.2, 26.3, 25.7, 25.0, 21.5, 13.8; HRMS (ESI<sup>+</sup>) exact mass calculated for [M+H]<sup>+</sup> (C<sub>32</sub>H<sub>36</sub>NO<sub>4</sub>) requires *m/z* 498.2644, found *m/z* 498.2645.

The preparation of the **5a'** and **5b'**:

To a stirring solution of (*S*)-1-cinnamoylpyrrolidine-2-carboxylic acid (1230.0 mg, 5.0 mmol) and triethylamine

(690.0 uL, 5.0 mmol) in THF (7.5 mL) was added isobutylchloroformate (630.0 uL, 5.0 mmol) at  $-10^{\circ}\text{C}$ . After vigorous stirring for 50-60s, a solution of *L*-valine methyl ester hydrochloride (920.0 mg, 5.5 mmol) in DMSO (0.25 mL) was added followed by a solution of triethylamine (1.55 mL, 11.0 mmol) in THF (15.0 mL). The reaction mixture was then warmed to room temperature and vigorously stirred for 4.0 h. After the completion of the reaction, triethylamine hydrochloride was filtered off. The filtrate was concentrated and the residue was dissolved in EtOAc (30.0 mL). The solution was washed with saturated aqueous  $\text{NaHCO}_3$  ( $2 \times 10.0$  mL), and brine ( $1 \times 10.0$  mL), then dried over  $\text{Na}_2\text{SO}_4$ , filtered, and evaporated under reduced pressure to afford the crude product, which was further purified by column chromatography  $\text{CH}_2\text{Cl}_2$ : $\text{CH}_3\text{OH}$  (500:1 to 100:3 (v/v)) to yield **5a'** in 55% yield (1092.0 mg, 55%).  $^1\text{H}$  NMR (400 MHz,  $\text{CDCl}_3$ ):  $\delta$  7.80 (d,  $J = 8.0$  Hz, 1H), 7.77 (d,  $J = 15.4$  Hz, 1H), 7.51-7.58 (m, 2H), 7.35-7.41 (m, 3H), 6.77 (d,  $J = 15.4$  Hz, 1H), 4.81 (d,  $J = 7.2$  Hz, 1H), 4.44 (dd,  $J = 5.1, 8.3$  Hz, 1H), 3.76-3.81 (m, 1H), 3.74 (s, 3H), 3.61-3.69 (m, 1H), 2.45-2.53 (m, 1H), 2.13-2.23 (m, 2H), 1.99-2.10 (m, 1H), 1.80-1.92 (m, 1H), 0.91 (d,  $J = 6.8$  Hz, 6H);  $^{13}\text{C}$  NMR (100 MHz,  $\text{CDCl}_3$ ):  $\delta$  172.2, 171.1, 166.2, 143.3, 134.9, 130.0, 128.8, 128.0, 117.8, 59.8, 57.6, 52.0, 47.4, 30.9, 26.8, 25.1, 19.1, 17.7; HRMS (ESI+) exact mass calculated for  $[\text{M}+\text{H}]^+$  ( $\text{C}_{20}\text{H}_{27}\text{N}_2\text{O}_4$ ) requires  $m/z$  359.1971, found  $m/z$  359.1964.

To a stirring solution of (*S*)-1-cinnamoylpyrrolidine-2-carboxylic acid (615.3 mg, 2.5 mmol) and triethylamine (346.5 uL, 2.5 mmol) in THF (3.8 mL) was added isobutylchloroformate (315.5 uL, 2.5 mmol) at  $-10^{\circ}\text{C}$ . After vigorous stirring for 50-60s, a solution of *L*-Phenylalanine methyl ester (448.0 uL, 2.75 mmol) in THF (0.5 mL) was added dropwise. The reaction mixture was then warmed to room temperature and vigorously stirred for 4.0 h. After the completion of the reaction, the mixture was concentrated and the residue was dissolved in EtOAc (30.0 mL). The solution was washed with water ( $2 \times 10.0$  mL), and brine ( $1 \times 10.0$  mL), then dried over  $\text{Na}_2\text{SO}_4$ , filtered, and evaporated under reduced pressure to afford the crude product, which was further purified by column chromatography  $\text{CH}_2\text{Cl}_2$ : $\text{CH}_3\text{OH}$  (300:1 to 100:3 (v/v)) to yield **5b'** in 73% yield (741.8 mg, 73%).  $^1\text{H}$  NMR (400 MHz,  $\text{CDCl}_3$ ):  $\delta$  7.83 (d,  $J = 7.9$  Hz, 1H), 7.74 (d,  $J = 15.4$  Hz, 1H), 7.53-7.61 (m, 2H), 7.37-7.45 (m, 3H), 7.09-7.19 (m, 5H), 6.67 (d,  $J = 15.4$  Hz, 1H), 4.80-4.88 (m, 1H), 4.74 (d,  $J = 7.0$  Hz, 1H), 3.73 (s, 3H), 3.46-3.59 (m, 2H), 3.15-3.24 (m, 1H), 2.92-3.00 (m, 1H), 2.39-2.47 (m, 1H), 1.90-2.01 (m, 2H), 1.71-1.80 (m, 1H);  $^{13}\text{C}$  NMR (100 MHz,  $\text{CDCl}_3$ ):  $\delta$  171.9, 170.7, 166.1, 143.3, 136.3, 135.0, 130.0, 129.3, 128.9, 128.2, 127.9, 126.6, 117.8, 59.6, 53.3, 52.2, 47.2, 38.1, 26.5, 24.8; HRMS (ESI+) exact mass calculated for  $[\text{M}+\text{H}]^+$  ( $\text{C}_{24}\text{H}_{27}\text{N}_2\text{O}_4$ ) requires  $m/z$  407.1965, found  $m/z$  407.1970.

### 3. General procedure for acylazidation of olefinic compounds

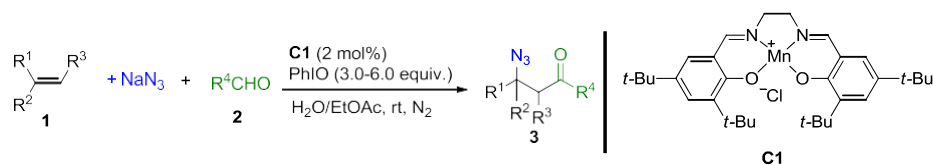

To a reaction mixture of catalyst **C1** (3.5 mg, 0.006 mmol, 2 mol%) and a fine powder PhIO (198.0 mg, 0.9 mmol, 3.0 equiv) in a 25 mL-Schlenk tube were added a aqueous solution of  $\text{NaN}_3$  (4.0 mL, 0.3 M, 1.2 mmol, 4.0 equiv.), freshly distilled or purified aldehyde (1.5 mmol, 5.0 equiv.), and olefin **1** (0.3 mmol) under a nitrogen atmosphere. Then 2.4 mL EtOAc was added to the above reaction mixture and the reaction was stirred at room temperature. After the completion of the reaction as judged by TLC analysis (the reaction generally completed when the solid PhIO disappeared), the reaction mixture was extracted with EA (20.0 mL $\times$ 1) and  $\text{CH}_2\text{Cl}_2$  (15.0 mL $\times$ 2). The combined organic layer was dried over anhydrous sodium sulfate and evaporated under reduced pressure to afford the crude product, which was purified by flash chromatography on silica gel to give the desired products. (Note: Grinding the solid PhIO into very fine powder and removing oxygen are

necessary for an efficient reaction).

## 4. Analytical data

### 1-azido-1-phenylhexan-3-one (3a):

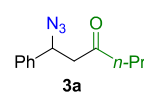 Compound **3a** was synthesized according to the general procedure using 3.0 equiv PhIO (0.9 mmol, 198.1 mg) as a colorless oil in 75% yield; <sup>1</sup>H NMR (400 MHz, CDCl<sub>3</sub>): δ 7.31–7.40 (m, 5H), 5.05 (dd, *J* = 4.8, 9.0 Hz, 1H), 2.95 (dd, *J* = 9.0, 16.9 Hz, 1H), 2.70 (dd, *J* = 4.8, 16.9 Hz, 1H), 2.31–2.46 (m, 2H), 1.55–1.64 (m, 2H), 0.89 (t, *J* = 7.4 Hz, 3H); <sup>13</sup>C NMR (100 MHz, CDCl<sub>3</sub>): δ 207.4, 139.0, 128.9, 128.4, 126.7, 61.2, 48.8, 45.5, 16.9, 13.6; HRMS (ESI<sup>+</sup>) exact mass calculated for [M+Na]<sup>+</sup> (C<sub>12</sub>H<sub>15</sub>N<sub>3</sub>NaO) requires *m/z* 240.1113, found *m/z* 240.1118.

### 1-azido-4-ethyl-1-phenylhexan-3-one (3b):

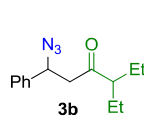 Compound **3b** was synthesized according to the general procedure using 3.0 equiv PhIO (0.9 mmol, 198.3 mg) as a colorless oil in 55% yield; <sup>1</sup>H NMR (400 MHz, CDCl<sub>3</sub>): δ 7.30–7.39 (m, 5H), 5.09 (dd, *J* = 4.8, 8.7 Hz, 1H), 2.98 (dd, *J* = 8.8, 17.4 Hz, 1H), 2.71 (dd, *J* = 4.8, 17.4 Hz, 1H), 2.26–2.33 (m, 1H), 1.54–1.67 (m, 2H), 1.37–1.51 (m, 2H), 0.84 (t, *J* = 7.4 Hz, 3H), 0.77 (t, *J* = 7.4 Hz, 3H); <sup>13</sup>C NMR (100 MHz, CDCl<sub>3</sub>): δ 210.8, 139.2, 128.8, 128.4, 126.8, 61.1, 55.9, 48.4, 23.8, 23.7, 11.6, 11.6; HRMS (ESI<sup>+</sup>) exact mass calculated for [M+Na]<sup>+</sup> (C<sub>14</sub>H<sub>19</sub>N<sub>3</sub>NaO) requires *m/z* 268.1426, found *m/z* 268.1423.

### 3-azido-1-cyclopropyl-3-phenylpropan-1-one (3c):

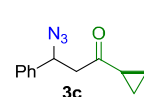 Compound **3c** was synthesized according to the general procedure using 3.0 equiv PhIO (0.9 mmol, 198.6 mg) as a colorless oil in 57% yield; <sup>1</sup>H NMR (400 MHz, CDCl<sub>3</sub>): δ 7.30–7.40 (m, 5H), 5.05 (dd, *J* = 4.7, 8.9 Hz, 1H), 3.11 (dd, *J* = 8.9, 17.0 Hz, 1H), 2.89 (dd, *J* = 4.7, 17.0 Hz, 1H), 1.87–1.93 (m, 1H), 1.01–1.11 (m, 2H), 0.84–0.94 (m, 2H); <sup>13</sup>C NMR (100 MHz, CDCl<sub>3</sub>): δ 207.10, 139.0, 128.8, 128.3, 126.7, 61.2, 49.4, 21.1, 11.2, 11.1; HRMS (ESI<sup>+</sup>) exact mass calculated for [M+Na]<sup>+</sup> (C<sub>12</sub>H<sub>13</sub>N<sub>3</sub>NaO) requires *m/z* 238.0956, found *m/z* 238.0961.

### 3-azido-1,3-diphenylpropan-1-one (3d):

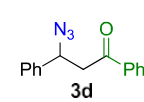 Compound **3d** was synthesized according to the general procedure using 3.0 equiv PhIO (0.9 mmol, 198.2mg) as a colorless oil in 58% yield; However, if this compound was stored at -20 °C for 12 h, it became a white solid. <sup>1</sup>H NMR (400 MHz, CDCl<sub>3</sub>): δ 7.92–7.95 (m, 2H), 7.55–7.58 (m, 1H), 7.42–7.49 (m, 2H), 7.36–7.42 (m, 4H), 7.30–7.35 (m, 1H), 5.26 (dd, *J* = 4.6, 8.7 Hz, 1H), 3.55 (dd, *J* = 8.7, 17.3 Hz, 1H), 3.25 (dd, *J* = 4.7, 17.3 Hz, 1H); <sup>13</sup>C NMR (100 MHz, CDCl<sub>3</sub>): δ 196.4, 139.2, 136.4, 133.5, 128.9, 128.7, 128.4, 128.1, 126.8, 61.5, 45.2; HRMS (ESI<sup>+</sup>) exact mass calculated for [M+Na]<sup>+</sup> (C<sub>15</sub>H<sub>13</sub>N<sub>3</sub>NaO) requires *m/z* 274.0956, found *m/z* 274.0959.

### 1-azido-1-(p-tolyl)hexan-3-one (3e):

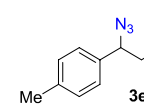 Compound **3e** was synthesized according to the general procedure using 3.5 equiv PhIO (1.05 mmol, 231.6 mg) as a colorless oil in 82% yield; <sup>1</sup>H NMR (400 MHz, CDCl<sub>3</sub>): δ 7.19 (q, *J* = 8.3 Hz, 4H), 5.01 (dd, *J* = 4.9, 8.9 Hz, 1H), 2.93 (dd, *J* = 8.9, 16.8 Hz, 1H), 2.68 (dd, *J* = 4.9, 16.8 Hz, 1H), 2.30–2.45 (m, 2H), 2.34 (s, 3H), 1.54–1.64 (m, 2H), 0.89 (t, *J* = 7.4 Hz, 3H); <sup>13</sup>C NMR (100 MHz, CDCl<sub>3</sub>): δ 207.3, 138.2, 135.8, 129.5, 126.6, 61.0, 48.7, 45.4, 21.0, 16.9, 13.5; HRMS (ESI<sup>+</sup>) exact mass calculated for [M+Na]<sup>+</sup> (C<sub>13</sub>H<sub>17</sub>N<sub>3</sub>NaO) requires *m/z* 254.1269, found *m/z* 254.1269.

### 1-azido-1-(o-tolyl)hexan-3-one (3f):

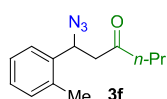

Compound **3f** was synthesized according to the general procedure using 3.0 equiv PhIO (0.9 mmol, 198.0 mg) as a colorless oil in 62% yield;  $^1\text{H}$  NMR (400 MHz,  $\text{CDCl}_3$ ):  $\delta$  7.32–7.34 (m, 1H), 7.17–7.26 (m, 3H), 5.31 (dd,  $J = 4.2, 8.8$  Hz, 1H), 2.95 (dd,  $J = 9.2, 17.1$  Hz, 1H), 2.68 (dd,  $J = 4.3, 17.1$  Hz, 1H), 2.34–2.48 (m, 2H), 2.40 (s, 3H), 1.57–1.66 (m, 2H), 0.91 (t,  $J = 7.4$  Hz, 3H);  $^{13}\text{C}$  NMR (100 MHz,  $\text{CDCl}_3$ ):  $\delta$  207.5, 137.0, 135.3, 130.9, 128.1, 126.5, 126.1, 57.6, 47.9, 45.5, 19.2, 17.0, 13.6; HRMS (ESI $^{+}$ ) exact mass calculated for  $[\text{M}+\text{Na}]^{+}$  ( $\text{C}_{13}\text{H}_{17}\text{N}_3\text{NaO}$ ) requires  $m/z$  254.1269, found  $m/z$  254.1274.

#### 1-azido-1-(4-methoxyphenyl)hexan-3-one (3g):

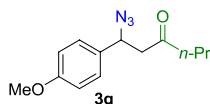

Compound **3g** was synthesized according to the general procedure using 3.0 equiv PhIO (0.9 mmol, 198.1 mg) as a colorless oil in 71% yield;  $^1\text{H}$  NMR (400 MHz,  $\text{CDCl}_3$ ):  $\delta$  7.25 (d,  $J = 8.7$  Hz, 2H), 6.90 (d,  $J = 8.7$  Hz, 2H), 5.00 (dd,  $J = 5.1, 8.8$  Hz, 1H), 3.80 (s, 3H), 2.94 (dd,  $J = 8.8, 16.8$  Hz, 1H), 2.69 (dd,  $J = 5.1, 16.8$  Hz, 1H), 2.30–2.45 (m, 2H), 1.54–1.64 (m, 2H), 0.89 (t,  $J = 7.4$  Hz, 3H);  $^{13}\text{C}$  NMR (100 MHz,  $\text{CDCl}_3$ ):  $\delta$  207.4, 159.6, 130.9, 128.0, 114.2, 60.8, 55.2, 48.7, 45.5, 16.9, 13.6; HRMS (ESI $^{+}$ ) exact mass calculated for  $[\text{M}+\text{Na}]^{+}$  ( $\text{C}_{13}\text{H}_{17}\text{N}_3\text{NaO}_2$ ) requires  $m/z$  270.1218, found  $m/z$  270.1219.

#### 1-([1,1'-biphenyl]-4-yl)-1-azidohexan-3-one (3h):

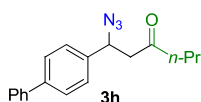

Compound **3h** was synthesized according to the general procedure using 3.5 equiv PhIO (1.05 mmol, 231.0 mg) as a colorless oil in 60% yield;  $^1\text{H}$  NMR (400 MHz,  $\text{CDCl}_3$ ):  $\delta$  7.54–7.63 (m, 4H), 7.33–7.45 (m, 5H), 5.10 (dd,  $J = 4.9, 8.9$  Hz, 1H), 2.98 (dd,  $J = 8.9, 17.0$  Hz, 1H), 2.74 (dd,  $J = 4.9, 17.0$  Hz, 1H), 2.32–2.49 (m, 2H), 1.56–1.65 (m, 2H), 0.90 (t,  $J = 7.4$  Hz, 3H);  $^{13}\text{C}$  NMR (100 MHz,  $\text{CDCl}_3$ ):  $\delta$  207.3, 141.3, 140.3, 137.9, 128.8, 127.6, 127.5, 127.2, 127.0, 61.0, 48.8, 45.4, 16.9, 13.6; HRMS (ESI $^{+}$ ) exact mass calculated for  $[\text{M}+\text{Na}]^{+}$  ( $\text{C}_{18}\text{H}_{19}\text{N}_3\text{NaO}$ ) requires  $m/z$  316.1426, found  $m/z$  316.1431.

#### 1-azido-1-(naphthalen-2-yl)hexan-3-one (3i):

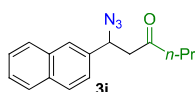

Compound **3i** was synthesized according to the general procedure using 3.5 equiv PhIO (1.05 mmol, 231.6 mg) as a colorless oil in 53% yield;  $^1\text{H}$  NMR (400 MHz,  $\text{CDCl}_3$ ):  $\delta$  7.78–7.86 (m, 4H), 7.46–7.51 (m, 2H), 7.42 (dd,  $J = 1.5, 8.5$  Hz, 1H), 5.22 (dd,  $J = 4.8, 8.8$  Hz, 1H), 3.02 (dd,  $J = 8.9, 17.0$  Hz, 1H), 2.77 (dd,  $J = 4.8, 17.0$  Hz, 1H), 2.30–2.46 (m, 2H), 1.55–1.64 (m, 2H), 0.88 (t,  $J = 7.4$  Hz, 3H);  $^{13}\text{C}$  NMR (100 MHz,  $\text{CDCl}_3$ ):  $\delta$  207.3, 136.3, 133.1, 128.9, 128.0, 127.7, 126.5, 126.4, 126.0, 124.1, 61.4, 48.8, 45.4, 16.9, 13.5; HRMS (ESI $^{+}$ ) exact mass calculated for  $[\text{M}+\text{Na}]^{+}$  ( $\text{C}_{16}\text{H}_{17}\text{N}_3\text{NaO}$ ) requires  $m/z$  290.1269, found  $m/z$  290.1267.

#### 1-azido-1-(2-chlorophenyl)hexan-3-one (3j):

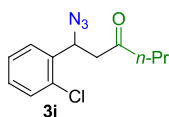

Compound **3j** was synthesized according to the general procedure using 3.5 equiv PhIO (1.05 mmol, 232.0 mg) as a colorless oil in 49% yield;  $^1\text{H}$  NMR (400 MHz,  $\text{CDCl}_3$ ):  $\delta$  7.46 (dd,  $J = 1.7, 7.6$  Hz, 1H), 7.39 (dd,  $J = 1.4, 7.8$  Hz, 1H), 7.25–7.33 (m, 2H), 5.55 (dd,  $J = 3.8, 9.2$  Hz, 1H), 2.74–2.87 (m, 2H), 2.43 (t,  $J = 7.3$  Hz, 2H), 1.60–1.69 (m, 2H), 0.93 (t,  $J = 7.4$  Hz, 3H);  $^{13}\text{C}$  NMR (100 MHz,  $\text{CDCl}_3$ ):  $\delta$  207.0, 137.0, 132.3, 130.0, 129.3, 127.7, 127.4, 57.9, 47.8, 45.1, 17.1, 13.6; HRMS (ESI $^{+}$ ) exact mass calculated for  $[\text{M}+\text{Na}]^{+}$  ( $\text{C}_{12}\text{H}_{14}\text{N}_3\text{ClNaO}$ ) requires  $m/z$  274.0723, found  $m/z$  274.0719.

#### 1-azido-1-(4-fluorophenyl)hexan-3-one (3k):

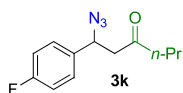

Compound **3k** was synthesized according to the general procedure using 3.0 equiv PhIO (0.9

mmol, 198.9 mg) as a colorless oil in 70% yield;  $^1\text{H}$  NMR (400 MHz,  $\text{CDCl}_3$ ):  $\delta$  7.28–7.33 (m, 2H), 7.03–7.09 (m, 2H), 5.05 (dd,  $J = 5.1, 8.6$  Hz, 1H), 2.93 (dd,  $J = 8.6, 17.0$  Hz, 1H), 2.69 (dd,  $J = 5.2, 17.0$  Hz, 1H), 2.30–2.46 (m, 2H), 1.55–1.64 (m, 2H), 0.89 (t,  $J = 7.4$  Hz, 3H);  $^{13}\text{C}$  NMR (100 MHz,  $\text{CDCl}_3$ ):  $\delta$  207.1, 162.5 (d,  $J = 245.9$  Hz), 134.8 (d,  $J = 3.3$  Hz), 128.5 (d,  $J = 8.2$  Hz), 115.8 (d,  $J = 21.5$  Hz), 60.5, 48.9, 45.4, 16.9, 13.5; HRMS (ESI+) exact mass calculated for  $[\text{M}+\text{Na}]^+$  ( $\text{C}_{12}\text{H}_{14}\text{N}_3\text{FNaO}$ ) requires  $m/z$  258.1019, found  $m/z$  258.1017.

#### 1-azido-1-(4-bromophenyl)hexan-3-one (3l):

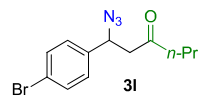

Compound **3l** was synthesized according to the general procedure using 3.5 equiv PhIO (1.05 mmol, 232.0 mg) as a colorless oil in 59% yield;  $^1\text{H}$  NMR (400 MHz,  $\text{CDCl}_3$ ):  $\delta$  7.55–7.47 (d,  $J = 8.4$ , 2H), 7.21 (d,  $J = 8.4$  Hz, 2H), 5.03 (dd,  $J = 5.1, 8.6$  Hz, 1H), 2.92 (dd,

$J = 8.6, 17.1$  Hz, 1H), 2.68 (dd,  $J = 5.1, 17.1$  Hz, 1H), 2.30–2.46 (m, 2H), 1.55–1.64 (m, 2H), 0.90 (t,  $J = 7.4$  Hz, 3H);  $^{13}\text{C}$  NMR (100 MHz,  $\text{CDCl}_3$ ):  $\delta$  207.0, 138.1, 132.0, 128.4, 122.3, 60.6, 48.8, 45.4, 16.9, 13.6; HRMS (ESI+) exact mass calculated for  $[\text{M}+\text{Na}]^+$  ( $\text{C}_{12}\text{H}_{14}\text{N}_3\text{BrNaO}$ ) requires  $m/z$  318.0218, found  $m/z$  318.0213.

#### 1-azido-1-(2,5-dimethylphenyl)hexan-3-one (3m):

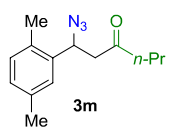

Compound **3m** was synthesized according to the general procedure using 3.5 equiv PhIO (1.05 mmol, 231.8 mg) as a colorless oil in 70% yield;  $^1\text{H}$  NMR (400 MHz,  $\text{CDCl}_3$ ):  $\delta$  7.13 (s, 1H), 7.02–7.11 (m, 2H), 5.28 (dd,  $J = 4.1, 9.3$  Hz, 1H), 2.94 (dd,  $J = 9.3, 17.1$  Hz, 1H), 2.65 (dd,  $J = 4.1, 17.1$  Hz, 1H), 2.36–2.45 (m, 2H), 2.32 (s, 3H), 2.29 (s, 3H), 1.57–1.66 (m, 2H), 0.91 (t,  $J = 7.4$  Hz, 3H);  $^{13}\text{C}$  NMR (100 MHz,  $\text{CDCl}_3$ ):  $\delta$  207.5, 136.8, 136.0, 132.0, 130.8, 128.8, 126.7, 57.6, 48.0, 45.4, 21.0, 18.7, 17.0, 13.6; HRMS (ESI+) exact mass calculated for  $[\text{M}+\text{Na}]^+$  ( $\text{C}_{14}\text{H}_{19}\text{N}_3\text{NaO}$ ) requires  $m/z$  268.1426, found  $m/z$  268.1423.

#### 1-azido-1-(2-bromo-4-methylphenyl)hexan-3-one (3n):

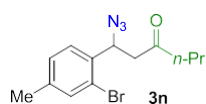

Compound **3n** was synthesized according to the general procedure using 3.5 equiv PhIO (1.05 mmol, 231.7 mg) as a colorless oil in 55% yield;  $^1\text{H}$  NMR: (400 MHz,  $\text{CDCl}_3$ )  $\delta$  7.40 (s, 1H), 7.31 (d,  $J = 7.9$  Hz, 1H), 7.15 (d,  $J = 7.7$  Hz, 1H), 5.48 (dd,  $J = 4.2, 8.9$  Hz, 1H), 2.72–2.84 (m, 2H), 2.42 (t,  $J = 7.3$  Hz, 2H), 2.32 (s, 3H), 1.59–1.69 (m, 2H), 0.93 (t,  $J = 7.4$  Hz, 3H);  $^{13}\text{C}$  NMR (100 MHz,  $\text{CDCl}_3$ ):  $\delta$  207.0, 139.9, 135.4, 133.6, 128.8, 127.6, 122.3, 59.9, 48.0, 45.1, 20.7, 17.0, 13.6; HRMS (ESI+) exact mass calculated for  $[\text{M}+\text{Na}]^+$  ( $\text{C}_{13}\text{H}_{16}\text{N}_3\text{BrNaO}$ ) requires  $m/z$  332.0374, found  $m/z$  332.0373.

#### 1-azido-1-mesitylhexan-3-one (3o):

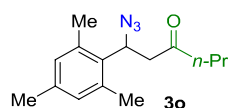

Compound **3o** was synthesized according to the general procedure using 6.0 equiv PhIO (1.8 mmol, 398.0 mg) as a colorless oil in 73% yield;  $^1\text{H}$  NMR (400 MHz,  $\text{CDCl}_3$ ):  $\delta$  6.85 (s, 2H), 5.67 (dd,  $J = 4.2, 9.0$  Hz, 1H), 3.10 (dd,  $J = 9.1, 17.2$  Hz, 1H), 2.60 (dd,  $J = 4.2, 17.2$  Hz, 1H), 2.38–2.48 (m, 2H), 2.42 (s, 6H), 2.25 (s, 3H), 1.56–1.65 (m, 2H), 0.90 (t,  $J = 7.4$  Hz, 3H);  $^{13}\text{C}$  NMR (100 MHz,  $\text{CDCl}_3$ ):  $\delta$  207.6, 137.6, 136.4, 131.9, 130.2, 56.8, 46.4, 45.4, 20.7, 20.7, 17.00, 13.6; HRMS (ESI+) exact mass calculated for  $[\text{M}+\text{Na}]^+$  ( $\text{C}_{15}\text{H}_{21}\text{N}_3\text{NaO}$ ) requires  $m/z$  282.1582, found  $m/z$  282.1578.

#### 1-azido-1,1-diphenylhexan-3-one (3p):

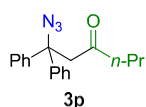

Compound **3p** was synthesized according to the general procedure using 3.5 equiv PhIO (1.05 mmol, 231.9 mg) as a colorless oil in 77% yield;  $^1\text{H}$  NMR (400 MHz,  $\text{CDCl}_3$ ):  $\delta$  7.27–7.35 (m,

10H), 3.43 (s, 2H), 2.10 (t,  $J = 7.2$  Hz, 2H), 1.37–1.43 (m, 2H), 0.74 (t,  $J = 7.4$  Hz, 3H);  $^{13}\text{C}$  NMR (100 MHz,  $\text{CDCl}_3$ ):  $\delta$  206.6, 142.1, 128.4, 127.8, 126.8, 70.4, 51.2, 46.1, 16.7, 13.4; HRMS (ESI+) exact mass calculated for  $[\text{M}+\text{Na}]^+$  ( $\text{C}_{18}\text{H}_{19}\text{N}_3\text{NaO}$ ) requires  $m/z$  316.1426, found  $m/z$  316.1430.

#### 1-azido-1-cyclohexyl-1-phenylhexan-3-one (3q):

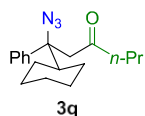

Compound **3q** was synthesized according to the general procedure using 6 equiv PhIO (1.8 mmol, 396.0 mg) as a colorless oil in 50% yield;  $^1\text{H}$  NMR (400 MHz,  $\text{CDCl}_3$ ):  $\delta$  7.22–7.35 (m, 5H), 3.22 (d,  $J = 15.8$  Hz, 1H), 3.13 (d,  $J = 15.8$  Hz, 1H), 2.13–2.28 (m, 2H), 1.62–1.91 (m, 5H), 1.40–1.56 (m, 3H), 0.93–1.25 (m, 5H), 0.75 (t,  $J = 7.4$  Hz, 3H);  $^{13}\text{C}$  NMR (100 MHz,  $\text{CDCl}_3$ ):  $\delta$  207.2, 140.2, 128.1, 127.1, 126.4, 70.9, 48.5, 48.1, 46.0, 27.6, 26.4, 26.1, 16.7, 13.4; HRMS (ESI+) exact mass calculated for  $[\text{M}+\text{Na}]^+$  ( $\text{C}_{18}\text{H}_{25}\text{N}_3\text{NaO}$ ) requires  $m/z$  322.1895, found  $m/z$  322.1890.

#### 2-azido-2-phenylheptan-4-one (3r):

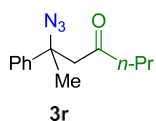

Compound **3r** was synthesized according to the general procedure using 3.5 equiv PhIO (1.05 mmol, 231.2 mg) as a colorless oil in 76% yield;  $^1\text{H}$  NMR (400 MHz,  $\text{CDCl}_3$ ):  $\delta$  7.34–7.42 (m, 4H), 7.25–7.30 (m, 1H), 2.87 (s, 2H), 2.24–2.33 (m, 1H), 2.13–2.22 (m, 1H), 1.83 (s, 3H), 1.42–1.51 (m, 2H), 0.80 (t,  $J = 7.4$  Hz, 3H);  $^{13}\text{C}$  NMR (100 MHz,  $\text{CDCl}_3$ ):  $\delta$  207.3, 142.7, 128.6, 127.7, 125.4, 64.6, 53.5, 46.2, 24.5, 16.7, 13.4; HRMS (ESI+) exact mass calculated for  $[\text{M}+\text{Na}]^+$  ( $\text{C}_{13}\text{H}_{17}\text{N}_3\text{NaO}$ ) requires  $m/z$  254.1269, found  $m/z$  254.1264.

#### 2-azido-2-(4-(trifluoromethyl)phenyl)heptan-4-one (3s):

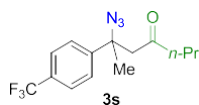

Compound **3s** was synthesized according to the general procedure using 4.0 equiv PhIO (1.2 mmol, 264.1 mg) as a colorless oil in 55% yield;  $^1\text{H}$  NMR: (400 MHz,  $\text{CDCl}_3$ )  $\delta$  7.63 (d,  $J = 8.3$  Hz, 2H), 7.55 (d,  $J = 8.3$  Hz, 2H), 2.92 (s, 2H), 2.19–2.35 (m, 2H), 1.86 (s, 3H), 1.45–1.54 (m, 2H), 0.82 (t,  $J = 7.4$  Hz, 3H);  $^{13}\text{C}$  NMR (100 MHz,  $\text{CDCl}_3$ ):  $\delta$  206.7, 146.9, 130.0, 126.0, 125.6, 124.0 (q,  $J = 270$  Hz), 64.2, 53.1, 46.2, 24.7, 16.8, 13.5; HRMS (ESI+) exact mass calculated for  $[\text{M}+\text{Na}]^+$  ( $\text{C}_{14}\text{H}_{16}\text{F}_3\text{N}_3\text{NaO}$ ) requires  $m/z$  322.1143, found  $m/z$  322.1149.

#### 1-azido-1,2-diphenylhexan-3-one (3t):

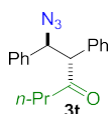

Compound **3t** (from cis-Stilbene) was synthesized according to the general procedure using 6.0 equiv PhIO (1.8 mmol, 396.6 mg) and 1 mol% catalyst (0.003 mmol, 1.7 mg) as a colorless oil in 54% yield;  $^1\text{H}$  NMR (400 MHz,  $\text{CDCl}_3$ ):  $\delta$  6.96–7.05 (m, 4H), 7.10–7.17 (m, 6H), 5.18 (d,  $J = 10.8$  Hz, 1H), 3.95 (d,  $J = 10.9$  Hz, 1H), 2.38–2.54 (m, 2H), 1.50–1.69 (m, 2H), 0.84 (t,  $J = 7.5$  Hz, 3H);  $^{13}\text{C}$  NMR (100 MHz,  $\text{CDCl}_3$ ):  $\delta$  208.2, 137.0, 134.0, 128.9, 128.6, 128.3, 128.1, 127.7, 127.5, 67.7, 63.9, 45.1, 16.9, 13.4; HRMS (ESI+) exact mass calculated for  $[\text{M}+\text{Na}]^+$  ( $\text{C}_{18}\text{H}_{19}\text{N}_3\text{NaO}$ ) requires  $m/z$  316.1426, found  $m/z$  316.1422.

#### 2-azido-2-(benzo[b]thiophen-2-yl)heptan-4-one (3u):

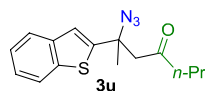

Compound **3u** was synthesized according to the general procedure using 4.0 equiv PhIO (1.2 mmol, 231.6 mg) and 2 mol% catalyst (0.006 mmol, 1.7 mg) as a colorless oil in 72% yield;  $^1\text{H}$  NMR (400 MHz,  $\text{CDCl}_3$ ):  $\delta$  7.70–7.81 (m, 2H), 7.28–7.37 (m, 2H), 7.21 (d,  $J = 0.4$  Hz, 1H), 2.98 (s, 2H), 2.24–2.43 (m, 2H), 1.95 (s, 3H), 1.47–1.58 (m, 2H), 0.83 (t,  $J = 7.4$  Hz, 3H);  $^{13}\text{C}$  NMR (100 MHz,  $\text{CDCl}_3$ ):  $\delta$  206.6, 147.9, 139.2, 124.7, 124.5, 123.8, 122.2, 120.9, 63.1, 53.4, 46.2, 24.8, 16.8, 13.5; HRMS (ESI+) exact mass calculated for  $[\text{M}+\text{Na}]^+$  ( $\text{C}_{15}\text{H}_{17}\text{N}_3\text{NaOS}$ ) requires  $m/z$  310.0990, found  $m/z$  310.0986.

**2-(azido(phenyl)methyl)-*N,N*-dibenzyl-3-oxohexanamide (3aa):**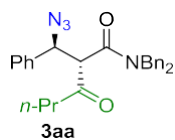

Compound **3aa** was synthesized according to the general procedure using 3.5 equiv PhIO (1.05 mmol, 231.0 mg) as a white solid in 55% yield; <sup>1</sup>H NMR (400 MHz, CDCl<sub>3</sub>): δ 7.24–7.49 (m, 15H), 5.50 (d, *J* = 10.6 Hz, 1H), 4.93 (d, *J* = 14.7 Hz, 1H), 4.53–4.78 (m, 2H), 4.50 (d, *J* = 15.2 Hz, 1H), 4.20 (d, *J* = 10.6 Hz, 1H), 2.00–2.19 (m, 2H), 1.18–1.27 (m, 2H), 0.59 (t, *J* = 7.4 Hz, 3H); <sup>13</sup>C NMR (100 MHz, CDCl<sub>3</sub>): δ 202.5, 166.9, 136.7, 136.2, 136.0, 129.1, 129.0, 128.7, 128.3, 127.9, 127.6, 126.7, 65.5, 62.6, 50.2, 49.3, 42.8, 16.3, 13.1; HRMS (ESI<sup>+</sup>) exact mass calculated for [M+H]<sup>+</sup> (C<sub>27</sub>H<sub>29</sub>N<sub>4</sub>O<sub>2</sub>) requires *m/z* 441.2291, found *m/z* 441.2295.

**2-(azido(phenyl)methyl)-*N,N*-diethyl-3-oxohexanamide (3ab):**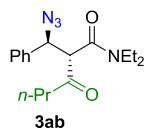

Compound **3ab** was synthesized according to the general procedure using 4.0 equiv PhIO (1.2 mmol, 264.5 mg) as a colorless oil in 55% yield; <sup>1</sup>H NMR (400 MHz, CDCl<sub>3</sub>): δ 7.32–7.40 (m, 5H), 5.42 (d, *J* = 10.6 Hz, 1H), 4.09 (d, *J* = 10.6 Hz, 1H), 3.53–3.57 (m, 2H), 3.31–3.38 (m, 2H), 2.35–2.43 (m, 1H), 2.12–2.20 (m, 1H), 1.26–1.37 (m, 2H), 1.30 (t, *J* = 7.2 Hz, 3H), 1.16 (t, *J* = 7.2 Hz, 3H), 0.66 (t, *J* = 7.4 Hz, 3H); <sup>13</sup>C NMR (100 MHz, CDCl<sub>3</sub>): δ 202.9, 165.3, 136.4, 129.0, 128.9, 127.9, 65.3, 62.8, 42.4, 42.2, 41.2, 16.4, 14.5, 13.1, 12.8; HRMS (ESI<sup>+</sup>) exact mass calculated for [M+H]<sup>+</sup> (C<sub>17</sub>H<sub>25</sub>N<sub>4</sub>O<sub>2</sub>) requires *m/z* 317.1972, found *m/z* 317.1969.

**2-(azido(4-(trifluoromethyl)phenyl)methyl)-*N,N*-diethyl-3-oxohexanamide (3ac):**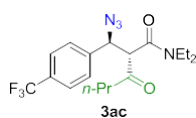

Compound **3ac** was synthesized according to the general procedure using 4.0 equiv PhIO (1.2 mmol, 264.2 mg) as a light yellow solid in 50% yield; <sup>1</sup>H NMR (400 MHz, CDCl<sub>3</sub>): δ 7.64 (d, *J* = 8.2 Hz, 2H), 7.49 (d, *J* = 8.2 Hz, 2H), 5.47 (d, *J* = 10.5 Hz, 1H), 4.5 (d, *J* = 10.5 Hz, 1H), 3.52–3.61 (m, 2H), 3.35–3.47 (m, 2H), 2.31–2.39 (m, 1H), 2.16–2.24 (m, 1H), 1.30–1.41 (m, 2H), 1.32 (t, *J* = 7.2 Hz, 3H), 1.18 (t, *J* = 7.2 Hz, 3H), 0.69 (t, *J* = 7.4 Hz, 3H); <sup>13</sup>C NMR (100 MHz, CDCl<sub>3</sub>): δ 202.3, 165.0, 140.9, 131.1, 128.4, 126.0 (q, *J* = 4.0 Hz), 123.8 (q, *J* = 270.0 Hz), 64.7, 62.6, 42.6, 41.4, 16.5, 14.6, 13.2, 12.8; HRMS (ESI<sup>+</sup>) exact mass calculated for [M+H]<sup>+</sup> (C<sub>18</sub>H<sub>24</sub>F<sub>3</sub>N<sub>4</sub>O<sub>2</sub>) requires *m/z* 385.1846, found *m/z* 385.1843.

**2-(azido(2-bromophenyl)methyl)-*N,N*-diethyl-3-oxohexanamide (3ad):**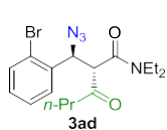

Compound **3ad** was synthesized according to the general procedure using 4.0 equiv PhIO (1.2 mmol, 265.0 mg) as a white solid in 62% yield; <sup>1</sup>H NMR (400 MHz, CDCl<sub>3</sub>): δ 7.61 (d, *J* = 7.9 Hz, 1H), 7.32–7.36 (m, 2H), 7.18–7.22 (m, 1H), 6.01 (d, *J* = 10.1 Hz, 1H), 4.22 (d, *J* = 10.1 Hz, 1H), 3.46–3.58 (m, 2H), 3.26–3.41 (m, 2H), 2.44–2.52 (m, 1H), 2.21–2.29 (m, 1H), 1.29–1.44 (m, 2H), 1.25 (t, *J* = 7.2 Hz, 3H), 1.16 (t, *J* = 7.1 Hz, 3H), 0.67 (t, *J* = 7.4 Hz, 3H); <sup>13</sup>C NMR (100 MHz, CDCl<sub>3</sub>): δ 203.4, 165.1, 135.6, 133.6, 130.4, 129.7, 128.1, 124.2, 63.3, 61.6, 42.3, 41.7, 41.3, 16.4, 14.5, 13.1, 12.8; HRMS (ESI<sup>+</sup>) exact mass calculated for [M+H]<sup>+</sup> (C<sub>17</sub>H<sub>24</sub>BrN<sub>4</sub>O<sub>2</sub>) requires *m/z* 395.1077, found *m/z* 395.1074.

**2-(azido(3-fluorophenyl)methyl)-*N,N*-diethyl-3-oxohexanamide (3ae):**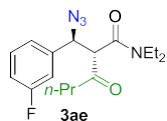

Compound **3ae** was synthesized according to the general procedure using 4.0 equiv PhIO (1.2 mmol, 264.0 mg) as a white solid in 50% yield; <sup>1</sup>H NMR (400 MHz, CDCl<sub>3</sub>): δ 7.33–7.38 (m, 1H), 7.15 (d, *J* = 7.7 Hz, 1H), 7.02–7.08 (m, 2H), 5.41 (d, *J* = 10.6 Hz, 1H), 4.03 (d, *J* = 10.6 Hz, 1H), 3.52–3.61 (m, 2H), 3.33–3.44 (m, 2H), 2.33–2.41 (m, 1H), 2.16–2.24 (m, 1H), 1.26–1.42 (m, 2H), 1.30 (t, *J* = 7.2 Hz, 3H), 1.17 (t, *J* = 7.1 Hz, 3H), 0.69 (t, *J* = 7.4 Hz, 3H); <sup>13</sup>C NMR (100 MHz,



CDCl<sub>3</sub>):  $\delta$  202.5, 165.0, 162.9 (d,  $J$  = 246.0 Hz), 139.1 (d,  $J$  = 6.0 Hz), 130.5 (d,  $J$  = 9.0 Hz), 123.7 (d,  $J$  = 3.0 Hz), 116.1 (d,  $J$  = 20.0 Hz), 114.8 (d,  $J$  = 22 Hz), 64.7, 62.6, 42.5, 41.2, 16.4, 14.5, 13.2, 12.8; HRMS (ESI<sup>+</sup>) exact mass calculated for [M+H]<sup>+</sup> (C<sub>17</sub>H<sub>24</sub>FN<sub>4</sub>O<sub>2</sub>) requires  $m/z$  335.1878, found  $m/z$  335.1882.

**2-(azido(4-fluorophenyl)methyl)-*N,N*-diethyl-3-oxohexanamide (3af):**

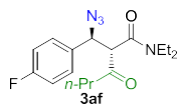

Compound **3af** was synthesized according to the general procedure using 4.0 equiv PhIO (1.2 mmol, 264.0 mg) as a white solid in 59% yield; <sup>1</sup>H NMR (400 MHz, CDCl<sub>3</sub>):  $\delta$  7.34–7.37 (m, 2H), 7.05–7.09 (t,  $J$  = 8.3 Hz, 2H), 5.42 (d,  $J$  = 10.6 Hz, 1H), 4.04 (d,  $J$  = 10.6 Hz, 1H), 3.53–3.62 (m, 2H), 3.32–3.44 (m, 2H), 2.34–2.42 (m, 1H), 2.13–2.21 (m, 1H), 1.28–1.40 (m, 2H), 1.30 (t,  $J$  = 7.0 Hz, 3H), 1.17 (t,  $J$  = 6.9 Hz, 3H), 0.68 (t,  $J$  = 7.3 Hz, 3H); <sup>13</sup>C NMR (100 MHz, CDCl<sub>3</sub>):  $\delta$  202.7, 165.2, 162.8 (d,  $J$  = 247.0 Hz), 132.4 (d,  $J$  = 3.0 Hz), 129.7 (d,  $J$  = 9.0 Hz), 116.0 (d,  $J$  = 22.0 Hz), 64.5, 62.9, 42.4, 42.3, 41.2, 16.4, 14.5, 13.1, 12.7; HRMS (ESI<sup>+</sup>) exact mass calculated for [M+H]<sup>+</sup> (C<sub>17</sub>H<sub>24</sub>FN<sub>4</sub>O<sub>2</sub>) requires  $m/z$  335.1878, found  $m/z$  335.1883.

**2-(azido(4-chlorophenyl)methyl)-*N,N*-diethyl-3-oxohexanamide (3ag):**

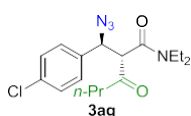

Compound **3ag** was synthesized according to the general procedure using 4.0 equiv PhIO (1.2 mmol, 264.2 mg) as a white solid in 53% yield; <sup>1</sup>H NMR (400 MHz, CDCl<sub>3</sub>):  $\delta$  7.36 (d,  $J$  = 8.5 Hz, 2H), 7.30 (d,  $J$  = 8.5 Hz, 2H), 5.40 (d,  $J$  = 10.6 Hz, 1H), 4.02 (d,  $J$  = 10.6 Hz, 1H), 3.52–3.58 (m, 2H), 3.32–3.44 (m, 2H), 2.34–2.41 (m, 1H), 2.13–2.21 (m, 1H), 1.26–1.41 (m, 2H), 1.30 (t,  $J$  = 7.2 Hz, 3H), 1.17 (t,  $J$  = 7.1 Hz, 3H), 0.69 (t,  $J$  = 7.4 Hz, 3H); <sup>13</sup>C NMR (100 MHz, CDCl<sub>3</sub>):  $\delta$  202.6, 165.1, 135.1, 134.8, 129.2, 129.1, 64.5, 62.7, 42.4, 42.3, 41.2, 16.4, 14.5, 13.2, 12.8; HRMS (ESI<sup>+</sup>) exact mass calculated for [M+H]<sup>+</sup> (C<sub>17</sub>H<sub>24</sub>ClN<sub>4</sub>O<sub>2</sub>) requires  $m/z$  351.1582, found  $m/z$  351.1577.

**2-(azido(3,4-difluorophenyl)methyl)-*N,N*-diethyl-3-oxohexanamide (3ah):**

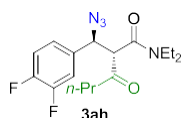

Compound **3ah** was synthesized according to the general procedure using 4.0 equiv PhIO (1.2 mmol, 264.9 mg) as a white solid in 67% yield; <sup>1</sup>H NMR (400 MHz, CDCl<sub>3</sub>):  $\delta$  7.10–7.22 (m, 3H), 5.39 (d,  $J$  = 10.5 Hz, 1H), 3.97 (d,  $J$  = 10.5 Hz, 1H), 3.51–3.61 (m, 2H), 3.34–3.45 (m, 2H), 2.32–2.40 (m, 1H), 2.17–2.25 (m, 1H), 1.35–1.43 (m, 2H), 1.31 (t,  $J$  = 7.2 Hz, 3H), 1.17 (t,  $J$  = 7.1 Hz, 3H), 0.71 (t,  $J$  = 7.4 Hz, 3H); <sup>13</sup>C NMR (100 MHz, CDCl<sub>3</sub>):  $\delta$  202.3, 164.9, 150.5 (dd,  $J$  = 5.0, 254.0 Hz), 150.4 (dd,  $J$  = 5.0, 240.0 Hz), 134.0 (t,  $J$  = 5.0 Hz), 124.2 (dd,  $J$  = 3.0, 6.0 Hz), 117.8 (d,  $J$  = 17.0 Hz), 116.9 (d,  $J$  = 17.0 Hz), 64.3, 62.7, 42.5, 41.3, 16.5, 14.5, 13.2, 12.8; HRMS (ESI<sup>+</sup>) exact mass calculated for [M+H]<sup>+</sup> (C<sub>17</sub>H<sub>23</sub>FN<sub>4</sub>O<sub>2</sub>) requires  $m/z$  353.1784, found  $m/z$  353.1782.

**2-(azido(2-methoxyphenyl)methyl)-*N,N*-diethyl-3-oxohexanamide (3ai):**

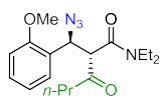

Compound **3ai** was synthesized according to the general procedure using 4.0 equiv PhIO (1.2 mmol, 264.2 mg) as a white solid in 54% yield; <sup>1</sup>H NMR (400 MHz, CDCl<sub>3</sub>):  $\delta$  7.22–7.37 (m, 2H), 6.86–7.01 (m, 2H), 5.82 (d,  $J$  = 10.7 Hz, 1H), 4.33 (d,  $J$  = 10.7 Hz, 1H), 3.88 (s, 3H), 3.49–3.62 (m, 2H), 3.29–3.46 (m, 2H), 2.41–2.52 (m, 1H), 2.17–2.27 (m, 1H), 1.22–1.42 (m, 2H), 1.28 (t,  $J$  = 7.2 Hz, 3H), 1.16 (t,  $J$  = 7.1 Hz, 3H), 0.66 (t,  $J$  = 7.4 Hz, 3H); <sup>13</sup>C NMR (100 MHz, CDCl<sub>3</sub>):  $\delta$  203.7, 165.8, 157.0, 130.2, 129.3, 124.0, 120.9, 111.1, 61.1, 60.0, 55.4, 42.6, 41.5, 41.1, 16.3, 14.4, 13.1, 12.8; HRMS (ESI<sup>+</sup>) exact mass calculated for [M+H]<sup>+</sup> (C<sub>18</sub>H<sub>27</sub>N<sub>4</sub>O<sub>3</sub>) requires  $m/z$  347.2078, found  $m/z$  347.2081.

**2-(azido(o-tolyl)methyl)-*N,N*-diethyl-3-oxohexanamide (3aj):**

Compound **3aj** was synthesized according to the general procedure using 4.0 equiv PhIO (1.2 mmol, 264.4 mg) as

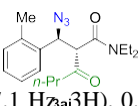
 a colorless oil in 57% yield;  $^1\text{H}$  NMR (400 MHz,  $\text{CDCl}_3$ ):  $\delta$  7.21–7.26 (m, 4H), 5.70 (d,  $J$  = 10.6 Hz, 1H), 4.27 (d,  $J$  = 10.6 Hz, 1H), 3.52–3.67 (m, 2H), 3.33–3.46 (m, 2H), 2.53 (s, 3H), 2.33–2.41 (m, 1H), 2.03–2.11 (m, 1H), 1.25–1.37 (m, 2H), 1.32 (t,  $J$  = 7.2 Hz, 3H), 1.17 (t,  $J$  = 7.1 Hz, 3H), 0.63 (t,  $J$  = 7.4 Hz, 3H);  $^{13}\text{C}$  NMR (100 MHz,  $\text{CDCl}_3$ ):  $\delta$  202.9, 165.4, 136.9, 134.3, 131.3, 128.8, 127.3, 126.5, 61.6, 61.1, 42.4, 42.1, 41.3, 19.7, 16.4, 14.5, 13.1, 12.8; HRMS (ESI+) exact mass calculated for  $[\text{M}+\text{H}]^+$  ( $\text{C}_{18}\text{H}_{27}\text{N}_4\text{O}_2$ ) requires  $m/z$  331.2129, found  $m/z$  331.2124.

#### 2-(azido(m-tolyl)methyl)-N,N-diethyl-3-oxohexanamide (3ak):


 Compound **3ak** was synthesized according to the general procedure using 4.0 equiv PhIO (1.2 mmol, 264.9 mg) as a colorless oil in 67% yield;  $^1\text{H}$  NMR (400 MHz,  $\text{CDCl}_3$ ):  $\delta$  7.20–7.29 (m, 1H), 7.10–7.17 (m, 3H), 5.37 (d,  $J$  = 10.6 Hz, 1H), 4.07 (d,  $J$  = 10.6 Hz, 1H), 3.5–3.64 (m, 2H), 3.29–3.43 (m, 2H), 2.33–2.45 (m, 1H), 2.36 (s, 3H), 2.12–2.22 (m, 1H), 1.26–1.40 (m, 2H), 1.29 (t,  $J$  = 7.2 Hz, 3H), 1.16 (t,  $J$  = 7.1 Hz, 3H), 0.66 (t,  $J$  = 7.4 Hz, 3H);  $^{13}\text{C}$  NMR (100 MHz,  $\text{CDCl}_3$ ):  $\delta$  203.0, 165.3, 138.7, 136.12, 129.8, 128.8, 128.5, 124.9, 65.3, 62.8, 42.3, 42.1, 41.2, 21.3, 16.4, 14.5, 13.1, 12.8; HRMS (ESI+) exact mass calculated for  $[\text{M}+\text{H}]^+$  ( $\text{C}_{18}\text{H}_{27}\text{N}_4\text{O}_2$ ) requires  $m/z$  331.2129, found  $m/z$  331.2134.

#### 2-(azido(naphthalen-2-yl)methyl)-N,N-diethyl-3-oxohexanamide (3al):

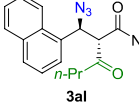
 Compound **3al** was synthesized according to the general procedure using 4.0 equiv PhIO (1.2 mmol, 264.1 mg) as a white solid in 70% yield;  $^1\text{H}$  NMR (400 MHz,  $\text{CDCl}_3$ ):  $\delta$  8.33 (d,  $J$  = 8.5 Hz, 1H), 7.81–7.93 (m, 2H), 7.60–7.66 (m, 1H), 7.42–7.58 (m, 3H), 6.24 (d,  $J$  = 10.3 Hz, 1H), 4.47 (d,  $J$  = 10.4 Hz, 1H), 3.55–3.72 (m, 2H), 3.30–3.46 (m, 2H), 2.29–2.44 (m, 1H), 1.94–2.10 (m, 1H), 1.31 (t,  $J$  = 7.2 Hz, 3H), 1.09–1.24 (m, 2H), 1.17 (t,  $J$  = 7.2 Hz, 3H), 0.48 (t,  $J$  = 7.4 Hz, 3H);  $^{13}\text{C}$  NMR (100 MHz,  $\text{CDCl}_3$ ):  $\delta$  203.3, 165.4, 134.1, 131.7, 131.2, 129.8, 129.1, 127.0, 126.2, 125.1, 122.9, 62.0, 42.4, 41.8, 41.3, 16.3, 14.5, 13.0, 12.9; HRMS (ESI+) exact mass calculated for  $[\text{M}+\text{H}]^+$  ( $\text{C}_{21}\text{H}_{27}\text{N}_4\text{O}_2$ ) requires  $m/z$  367.2129, found  $m/z$  367.2128.

#### 2-(azido(2,3-dimethoxyphenyl)methyl)-N,N-diethyl-3-oxohexanamide (3am):

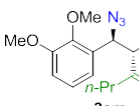
 Compound **3am** was synthesized according to the general procedure using 5.0 equiv PhIO (1.5 mmol, 330.9 mg) as a white solid in 74% yield;  $^1\text{H}$  NMR (400 MHz,  $\text{CDCl}_3$ ):  $\delta$  7.05 (t,  $J$  = 8.0 Hz, 1H), 6.86–6.94 (m, 2H), 5.71 (d,  $J$  = 10.8 Hz, 1H), 4.37 (d,  $J$  = 10.8 Hz, 1H), 3.95 (s, 3H), 3.87 (s, 3H), 3.50–3.64 (m, 2H), 3.32–3.49 (m, 2H), 2.39–2.51 (m, 1H), 2.17–2.28 (m, 1H), 1.26–1.41 (m, 2H), 1.29 (t,  $J$  = 7.2 Hz, 3H), 1.17 (t,  $J$  = 7.1 Hz, 3H), 0.67 (t,  $J$  = 7.4 Hz, 3H);  $^{13}\text{C}$  NMR (100 MHz,  $\text{CDCl}_3$ ):  $\delta$  203.4, 165.8, 152.9, 147.3, 129.7, 124.3, 121.0, 113.0, 61.3, 61.2, 60.8, 55.7, 42.4, 41.8, 41.2, 16.5, 14.5, 13.2, 12.9; HRMS (ESI+) exact mass calculated for  $[\text{M}+\text{H}]^+$  ( $\text{C}_{19}\text{H}_{29}\text{N}_4\text{O}_4$ ) requires  $m/z$  377.2183, found  $m/z$  377.2184.

#### 2-(azido(3,4,5-trimethoxyphenyl)methyl)-N,N-diethyl-3-oxohexanamide (3an):

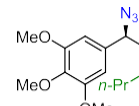
 Compound **3an** was synthesized according to the general procedure using 5.0 equiv PhIO (1.5 mmol, 330.2 mg) as a white solid in 78% yield;  $^1\text{H}$  NMR (400 MHz,  $\text{CDCl}_3$ ):  $\delta$  6.54 (s, 2H), 5.37 (d,  $J$  = 10.4 Hz, 1H), 4.02 (d,  $J$  = 10.4 Hz, 1H), 3.88 (s, 6H), 3.86 (s, 3H), 3.48–3.65 (m, 2H), 3.31–3.46 (m, 2H), 2.31–2.43 (m, 1H), 2.14–2.24 (m, 1H), 1.32–1.43 (m, 2H), 1.29 (t,  $J$  = 7.2 Hz, 3H), 1.16 (t,  $J$  = 7.1 Hz, 3H), 0.69 (t,  $J$  = 7.4 Hz, 3H);  $^{13}\text{C}$  NMR (100 MHz,  $\text{CDCl}_3$ ):  $\delta$  202.9, 165.1, 153.4, 138.3, 131.9, 105.0, 65.4, 62.9, 60.7, 56.2, 42.3, 41.1, 16.4, 14.4, 13.1, 12.7; HRMS (ESI+) exact mass calculated for  $[\text{M}+\text{H}]^+$  ( $\text{C}_{20}\text{H}_{30}\text{N}_4\text{NaO}_5$ ) requires  $m/z$  429.2108, found  $m/z$  429.2105.

**(8R,9S,13S,14S)-3-(1-azido-3-oxo-3-phenylpropyl)-13-methyl-6,7,8,9,11,12,13,14,15,16-decahydro-17H-cyclopenta[a]phenanthren-17-one (4a):**

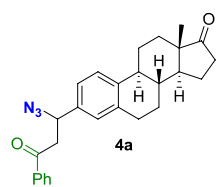

Compound **4a** was synthesized according to the general procedure using 4.0 equiv PhIO (1.2 mmol, 264.4 mg) as a colorless oil in 45% yield; This compound is nearly a 1:1 mixture of diastereomers, which can be separated by HPLC on a chiral stationary phase ((IA column, hexane: *i*-PrOH = 95:5, 0.5 mL/min, peak 1: 57.5 min (47%); Peak 2: 67.5 min (53%)). <sup>1</sup>H NMR (400 MHz, CDCl<sub>3</sub>): δ 7.95 (d, *J* = 7.7 Hz, 2H), 7.58 (t, *J* = 7.3 Hz, 1H), 7.47 (t, *J* = 7.6 Hz, 2H), 7.32 (d, *J* = 8.1 Hz, 1H), 7.18 (d, *J* = 8.1 Hz, 1H), 7.13 (s, 1H), 5.20 (dd, *J* = 4.5, 8.7 Hz, 1H), 3.55 (dd, *J* = 8.8, 17.3 Hz, 1H), 3.25 (dd, *J* = 4.5, 17.3 Hz, 1H), 2.90–3.00 (m, 2H), 2.51 (dd, *J* = 8.9, 19.0 Hz, 1H), 2.38–2.46 (m, 1H), 2.26–2.36 (m, 1H), 2.01–2.21 (m, 3H), 1.97 (d, *J* = 11.5 Hz, 1H), 1.42–1.68 (m, 6H), 0.91 (s, 3H); <sup>13</sup>C NMR (100 MHz, CDCl<sub>3</sub>): δ 220.8, 196.5, 140.0, 137.1, 136.7, 136.5, 133.4, 128.7, 128.1, 127.4, 125.9, 124.1, 61.3, 50.5, 47.9, 45.1, 44.3, 37.9, 35.8, 31.5, 29.4, 26.3, 25.6, 21.5, 13.8; HRMS (ESI<sup>+</sup>) exact mass calculated for [M+H]<sup>+</sup> (C<sub>27</sub>H<sub>29</sub>NaN<sub>3</sub>O<sub>2</sub>) requires *m/z* 450.2157, found *m/z* 450.2156.

**(8R,9S,13S,14S)-13-methyl-17-oxo-7,8,9,11,12,13,14,15,16,17-decahydro-6H-cyclopenta[a]phenanthren-3-yl (2-(azido(phenyl)methyl)-3-oxohexanoyl)-L-prolinate (4b):**

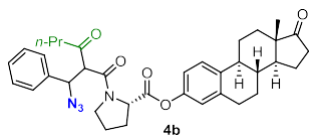

Compound **4b** was synthesized according to the general procedure using 4.0 equiv PhIO (1.2 mmol, 265.7 mg) as a colorless oil in 47% yield; <sup>1</sup>H NMR (400 MHz, CDCl<sub>3</sub>): δ 7.34–7.41 (m, 5H), 7.25–7.29 (m, 1H), 6.81–6.89 (m, 2H), 5.40 (d, *J* = 10.6 Hz, 1H), 4.82 (dd, *J* = 4.5, 8.5 Hz, 1H), 4.04 (d, *J* = 10.6 Hz, 1H), 3.81 (t, *J* = 6.3 Hz, 2H), 2.84–2.95 (m, 2H), 2.50 (dd, *J* = 8.9, 19.0 Hz), 2.36–2.43 (m, 2H), 2.35–2.26 (m, 3H), 2.20–2.11 (m, 3H), 2.07–1.93 (m, 4H), 1.60 (dd, *J* = 7.7, 10.7 Hz, 2H), 1.56–1.45 (m, 4H), 1.30–1.25 (m, 2H), 0.90 (s, 3H), 0.56 (t, *J* = 7.4 Hz, 3H); <sup>13</sup>C NMR (100 MHz, CDCl<sub>3</sub>): δ 220.6, 201.5, 170.5, 165.1, 148.4, 138.0, 137.5, 136.4, 129.0, 128.9, 127.9, 126.3, 121.3, 118.4, 64.7, 64.2, 59.4, 50.4, 47.9, 47.7, 44.1, 42.8, 37.9, 35.8, 31.5, 29.3, 29.2, 26.3, 25.7, 24.9, 21.5, 16.2, 13.8, 13.0; HRMS (ESI<sup>+</sup>) exact mass calculated for [M+H]<sup>+</sup> (C<sub>36</sub>H<sub>43</sub>N<sub>4</sub>O<sub>5</sub>) requires *m/z* 611.3233, found *m/z* 611.3229.

**methyl (2-(azido(phenyl)methyl)-3-oxohexanoyl)-D-prolyl-D-valinate (5a)**

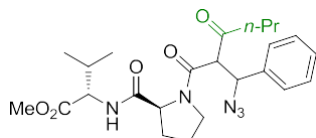

Compound **5a** was synthesized according to the general procedure using 4.0 equiv PhIO (1.2 mmol, 264.5 mg) as a colorless oil in 64% yield; <sup>1</sup>H NMR (400 MHz, CDCl<sub>3</sub>): δ 7.35–7.39 (m, 5H), 7.06 (d, *J* = 8.5 Hz, 1H), 5.40 (d, *J* = 10.6 Hz, 1H), 4.66–4.73 (m, 1H), 4.46 (dd, *J* = 5.0, 8.5 Hz, 1H), 4.07 (d, *J* = 10.6 Hz, 1H), 3.72–3.77 (m, 5H), 2.22–2.29 (m, 2H), 2.10–2.21 (m, 2H), 2.00–2.09 (m, 2H), 1.24–1.37 (m, 2H), 0.91 (d, *J* = 3.3 Hz, 3H), 0.89 (d, *J* = 3.3 Hz, 3H), 0.65 (t, *J* = 7.4 Hz, 3H); <sup>13</sup>C NMR (100 MHz, CDCl<sub>3</sub>): δ 201.4, 172.1, 170.7, 166.1, 136.3, 129.0, 128.9, 127.8, 64.7, 63.7, 60.3, 57.4, 52.0, 48.3, 43.6, 31.0, 27.8, 25.0, 18.9, 17.6, 16.2, 13.1; HRMS (ESI<sup>+</sup>) exact mass calculated for [M+H]<sup>+</sup> (C<sub>24</sub>H<sub>34</sub>N<sub>5</sub>O<sub>5</sub>) requires *m/z* 472.2560, found *m/z* 472.2565.

**methyl (2-(azido(phenyl)methyl)-3-oxohexanoyl)-L-prolyl-D-phenylalaninate (5b):**

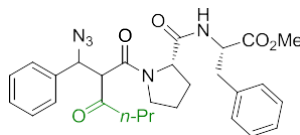

Compound **5b** was synthesized according to the general procedure using 4.0 equiv PhIO (1.2 mmol, 264.0 mg) as a colorless oil in 44% yield; <sup>1</sup>H NMR (400 MHz, CDCl<sub>3</sub>): δ 7.34–7.40 (m, 5H), 7.22–7.29 (m, 3H), 7.12–7.17 (m, 2H), 6.84 (d, *J* = 7.6 Hz, 1H), 5.38 (d, *J* = 10.5 Hz, 1H), 4.74–4.81 (m, 1H), 4.60–4.65 (m, 1H), 4.03 (d, *J* = 10.5 Hz, 1H), 3.64–3.73 (m, 5H), 3.03–3.15 (m, 2H), 2.18–2.28 (m, 3H),

1.96-2.06 (m, 3H), 1.25-1.35 (m, 2H), 0.63 (t,  $J = 7.4$  Hz, 3H);  $^{13}\text{C}$  NMR (100 MHz,  $\text{CDCl}_3$ ):  $\delta$  201.8, 171.6, 170.5, 166.0, 136.3, 135.8, 129.2, 129.0, 128.9, 128.4, 127.8, 126.7, 64.7, 63.9, 60.4, 53.5, 52.2, 48.1, 43.3, 37.9, 28.2, 24.7, 16.3, 13.1; HRMS (ESI+) exact mass calculated for  $[\text{M}+\text{H}]^+$  ( $\text{C}_{28}\text{H}_{34}\text{N}_5\text{O}_5$ ) requires  $m/z$  520.2560, found  $m/z$  520.2557.

## 5. Mechanistic Study

(1) the generation of acyl radical :

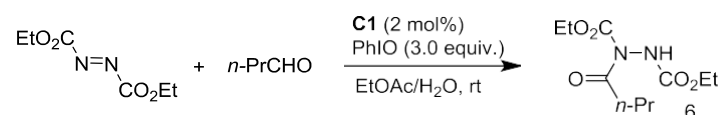

To a reaction mixture of catalyst **C1** (1.2 mg, 0.002 mmol, 2 mol%) and PhIO (66.8mg, 0.3 mmol, 3.0 equiv.) in a 10 mL-Schlenk tube were added 1.0 mL  $\text{H}_2\text{O}$ , *n*-butylaldehyde (44.0  $\mu\text{L}$ , 0.5 mmol, 5.0 equiv.), and diethyl (E)-diazene-1,2-dicarboxylate (16.0  $\mu\text{L}$ , 0.1 mmol, 1.0 equiv.) under a nitrogen atmosphere. Then 1.0 mL EtOAc was added to the above reaction mixture and the reaction was stirred at room temperature. After the completion of the reaction as judged by TLC analysis, the reaction mixture was extracted with EA (10.0 mL $\times$ 1) and  $\text{CH}_2\text{Cl}_2$  (8.0 mL $\times$ 2). The combined organic layer was dried over anhydrous sodium sulfate and evaporated under reduced pressure to afford the crude product, which was purified by flash chromatography on silica gel to give the desired products **6** (23.5 mg, 0.095mmol, 95%). Its spectral data obtained were identical with those reported in literature.<sup>11</sup>

(2) Radical clock experiment :

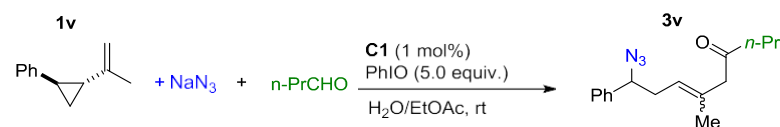

To a reaction mixture of catalyst **C1** (1.7 mg, 0.003 mmol, 1 mol%) and PhIO (339.9 mg, 1.5 mmol, 5.0 equiv.) were added a aqueous solution of  $\text{NaN}_3$  (4.0 mL, 0.3 M, 1.2 mmol, 4.0 equiv.), *n*-butylaldehyde (132.0  $\mu\text{L}$ , 1.5 mmol, 5.0 equiv.), and olefin **1u** (47.5mg, 0.3 mmol, 1.0 equiv.) under a nitrogen atmosphere. Then 2.4 mL EtOAc was added to the above reaction mixture and the reaction was stirred at room temperature. After the completion of the reaction as judged by TLC analysis, the reaction mixture was extracted with EA (20.0 mL $\times$ 1) and  $\text{CH}_2\text{Cl}_2$  (15.0 mL $\times$ 2). The combined organic layer was dried over anhydrous sodium sulfate and evaporated under reduced pressure to afford the crude product, which was purified by flash chromatography on silica gel to obtain a colourless oil **3v** (8.8 mg, 0.03 mmol, 11%).  $^1\text{H}$  NMR (400 MHz,  $\text{CDCl}_3$ ):  $\delta$  7.28-7.40 (m, 5H), 5.23 (t,  $J = 6.3$  Hz, 1H), 4.48 (t,  $J = 7.2$  Hz, 1H), 3.03 (s, 2H), 2.45-2.63 (m, 2H), 2.32 (t,  $J = 7.4$  Hz, 2H), 1.50-1.63 (m, 2H), 1.58 (s, 3H), 0.88 (t,  $J = 7.4$  Hz);  $^{13}\text{C}$  NMR (100 MHz,  $\text{CDCl}_3$ ):  $\delta$  209.2, 139.3, 132.6, 128.7, 128.2, 126.8, 124.2, 66.0, 53.8, 43.6, 35.0, 17.1, 16.6, 13.6; HRMS (ESI+) exact mass calculated for  $[\text{M}+\text{Na}]^+$  ( $\text{C}_{16}\text{H}_{21}\text{N}_3\text{NaO}$ ) requires  $m/z$  294.1582, found  $m/z$  294.1581.

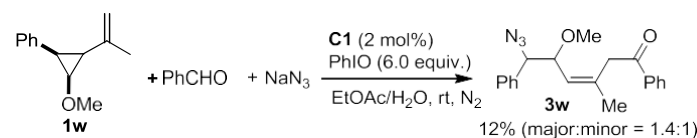

To a reaction mixture of catalyst **C1** (3.4 mg, 0.006 mmol, 2 mol%) and PhIO (399.7 mg, 1.8 mmol, 6.0 equiv.) were added a aqueous solution of NaN<sub>3</sub> (4.0 mL, 0.3 M, 1.2 mmol, 4.0 equiv.), benzaldehyde (150.0 uL, 1.5 mmol, 5.0 equiv.), and olefin **1w** (56.4mg, 0.3 mmol, 1.0 equiv.) under a nitrogen atmosphere. Then 2.4 mL EtOAc was added to the above reaction mixture and the reaction was stirred at room temperature. After the completion of the reaction as judged by TLC analysis, the reaction mixture was extracted with EA (20.0 mL×1) and CH<sub>2</sub>Cl<sub>2</sub> (15.0 mL×2). The combined organic layer was dried over anhydrous sodium sulfate and evaporated under reduced pressure to afford the crude product, which was purified by flash chromatography on silica gel to obtain a light yellow oil **3w** (12.2 mg, 0.03 mmol, 12%). Major isomer: <sup>1</sup>H NMR (400 MHz, CDCl<sub>3</sub>): δ 7.83-7.90 (m, 2H), 7.53-7.59 (m, 1H), 7.40-7.50 (m, 2H), 7.21-7.29 (m, 3H), 7.15-7.20 (m, 2H), 5.11 (dq, *J* = 1.2, 9.3 Hz, 1H), 4.40 (d, *J* = 7.9 Hz, 1H), 4.12 (dd, 1H, *J* = 8.1, 9.3 Hz), 3.57 (d, *J* = 15.2 Hz, 1H), 3.51 (d, *J* = 15.2 Hz, 1H), 3.32 (s, 3H), 1.41 (d, *J* = 1.2 Hz, 3H); <sup>13</sup>C NMR (100 MHz, CDCl<sub>3</sub>): δ 197.3, 136.7, 136.4, 136.3, 133.1, 128.5, 128.4, 128.3, 128.2, 127.8, 126.1, 80.2, 69.1 56.3, 49.1, 17.1; HRMS (ESI+) exact mass calculated for [M+Na]<sup>+</sup> (C<sub>20</sub>H<sub>21</sub>N<sub>3</sub>NaO<sub>2</sub>) requires *m/z* 358.1531, found *m/z* 358.1528.

Minor: <sup>1</sup>H NMR (400 MHz, CDCl<sub>3</sub>): δ 7.94-7.99 (m, 2H), 7.53-7.59 (m, 1H), 7.41-7.49 (m, 2H), 7.21-7.29 (m, 5H), 5.29 (dq, *J* = 1.2, 9.1 Hz, 1H), 4.67 (d, *J* = 4.4 Hz, 1H), 4.13 (dd, 1H, 1H, *J* = 4.3, 9.2 Hz), 3.73 (d, *J* = 15.2 Hz, 1H), 3.65 (d, *J* = 15.2 Hz, 1H), 3.26 (s, 3H), 1.42 (d, 3H, *J* = 1.3 Hz); <sup>13</sup>C NMR (100 MHz, CDCl<sub>3</sub>): δ 197.5, 137.0, 136.5, 136.2, 133.2, 128.6, 128.4, 128.3, 128.1, 127.7, 125.5, 80.2, 68.8, 56.3, 49.5, 17.0. HRMS (ESI+) exact mass calculated for [M+Na]<sup>+</sup> (C<sub>20</sub>H<sub>21</sub>N<sub>3</sub>NaO<sub>2</sub>) requires *m/z* 358.1531, found *m/z* 358.1528.

(3) competitive experiment:

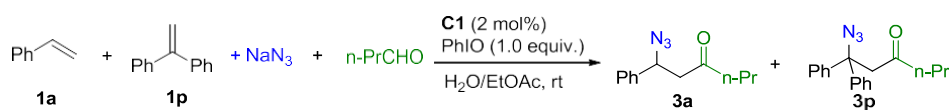

To a reaction mixture of catalyst **C1** (3.5 mg, 0.006 mmol, 2 mol%) and PhIO (137.2 mg, 0.6 mmol, 2.0 equiv.) were added a aqueous solution of NaN<sub>3</sub> (2.0 mL, 0.3 M, 0.6 mmol, 2.0 equiv.), *n*-butylaldehyde (53.0 uL, 0.6 mmol, 2.0 equiv.), olefin **1a** (35.0 uL, 0.3 mmol) and **1p** (53.0 uL, 0.3 mmol) under a nitrogen atmosphere. Then 2.4 mL EtOAc was added to the above reaction mixture and the reaction was stirred at room temperature. When the solid PhIO disappeared, the reaction mixture was extracted with EA (20.0 mL×1) and CH<sub>2</sub>Cl<sub>2</sub> (15.0 mL×2). The combined organic layer was dried over anhydrous sodium sulfate and evaporated under reduced pressure to afford the crude product, which was purified by flash chromatography on silica gel to obtain **3a** (5.5 mg, 8%), **3p** (38.5 mg, 46%). <sup>1</sup>H NMR ratio of crude mixture for **3p:3a** is 10.0:1 (20 min); 4.3:1 (1 h); 3.7:1 (2 h, full consumption of PhIO).

(4) in absence of NaN<sub>3</sub>:

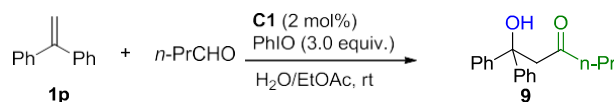

To a reaction mixture of catalyst **C1** (2.6 mg, 0.004 mmol, 2 mol%) and PhIO (136.0 mg, 0.6 mmol, 3.0 equiv.) in a 10 mL-Schlenk tube were added H<sub>2</sub>O (2.6 mL), *n*-butylaldehyde (88 uL, 1.0 mmol, 5.0 equiv.), and olefin **1p** (35 uL, 0.2 mmol, 1.0 equiv) under a nitrogen atmosphere. Then 1.6 mL EtOAc was added to the above reaction mixture and the reaction was stirred for about 48 h at room temperature. After the completion of the reaction as judged by TLC analysis (the reaction generally completed when the solid PhIO disappeared), the reaction mixture

was extracted with EA (20.0 mL×1) and CH<sub>2</sub>Cl<sub>2</sub> (15.0 mL×2). The combined organic layer was dried over anhydrous sodium sulfate and evaporated under reduced pressure to afford the crude product, which was purified by flash chromatography on silica gel to give the desired product **9** (22.8 mg, 41%). <sup>1</sup>H NMR (400 MHz, CDCl<sub>3</sub>): δ 7.35-7.40 (m, 4H), 7.26-7.32 (m, 4H), 7.17-7.23 (m, 2H), 3.38 (s, 2H), 2.39 (t, *J* = 7.2 Hz, 2H), 1.47–1.58 (m, 2H), 0.83 (t, *J* = 7.4 Hz, 3H); <sup>13</sup>C NMR (100 MHz, CDCl<sub>3</sub>): δ 212.7, 146.2, 128.2, 126.9, 125.6, 77.04, 52.1, 46.5, 16.7, 13.5; HRMS (ESI+) exact mass calculated for [M+Na]<sup>+</sup> (C<sub>18</sub>H<sub>20</sub>NaO<sub>2</sub>) requires *m/z* 291.1361, found *m/z* 291.1357.

(5) in the presence of a large excess of competitive nucleophiles:

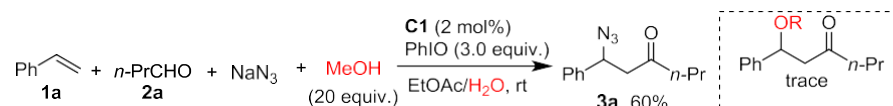

To a reaction mixture of catalyst **C1** (3.5 mg, 0.006 mmol, 2 mol%) and PhIO (198.0 mg, 0.9 mmol, 3.0 equiv.) in a 25 mL-Schlenk tube were added a aqueous solution of NaN<sub>3</sub> (4.0 mL, 0.3 M, 1.2 mmol, 4.0 equiv.), *n*-butylaldehyde (132 uL, 1.5 mmol, 5.0 equiv.), methanol (240.0 uL, 6.0 mmol, 20.0 equiv.) and olefin **1a** (35.0 uL, 0.3 mmol, 1.0 equiv.) under a nitrogen atmosphere. Then 2.4 mL EtOAc was added to the above reaction mixture and the reaction was stirred at room temperature. After the completion of the reaction as judged by TLC analysis, the reaction mixture was extracted with EA (20.0 mL×1) and CH<sub>2</sub>Cl<sub>2</sub> (15.0 mL×2). The combined organic layer was dried over anhydrous sodium sulfate and evaporated under reduced pressure to afford the crude product, which was purified by flash chromatography on silica gel to give the desired products **3a** (39.1 mg, 0.18 mmol, 60%).

(6) the observation of the competition between two radical rebound approaches:

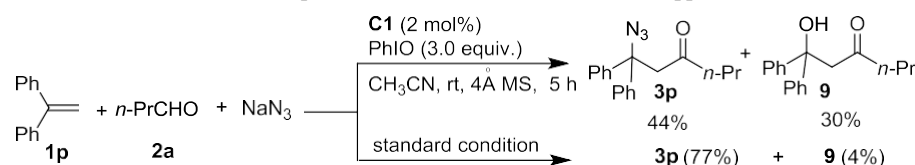

To a reaction mixture of catalyst **C1** (3.5 mg, 0.006 mmol, 2 mol%), NaN<sub>3</sub> (78.1 mg, 1.2 mmol, 4.0 equiv.), 4 Å MS (61.1 mg) and PhIO (198.0 mg, 0.9 mmol, 3.0 equiv.) in a 25 mL-Schlenk tube were added 4.0 mL CH<sub>3</sub>CN under a nitrogen atmosphere. Then *n*-butylaldehyde (132.0 uL, 1.5 mmol, 5.0 equiv.) and olefin **1p** (53.0 uL, 0.3 mmol, 1.0 equiv.) was added to the above reaction mixture and the reaction was stirred at room temperature. After the completion of the reaction as judged by TLC analysis, the reaction mixture was evaporated under reduced pressure to afford the crude product, which was purified by flash chromatography on silica gel to give the desired products **3p** (39.5 mg, 0.13 mmol, 44%) and **9** (24.2 mg, 0.09 mmol, 30%).

(7) Evaluation of factors affecting diastereoselectivity:

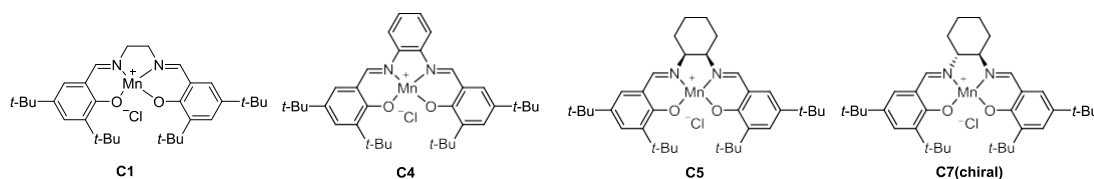

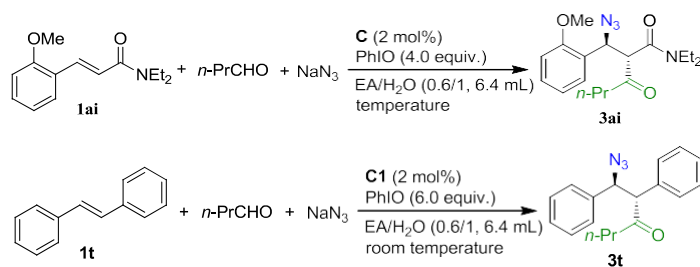

General experimental procedure:

To a reaction mixture of catalyst **C** (2 mol%) and a fine powder PhIO in a 25 mL-Schlenk tube were added a aqueous solution of NaN<sub>3</sub> (4.0 mL, 0.3 M, 1.2 mmol, 4.0 equiv.), freshly distilled aldehyde (1.5 mmol, 5.0 equiv.), and olefin (0.3 mmol) under a nitrogen atmosphere. Then 2.4 mL EtOAc was added to the above reaction mixture and the reaction was stirred at room temperature. After the completion of the reaction as judged by TLC analysis (the reaction generally completed when the solid PhIO disappeared), the reaction mixture was extracted with EA (20.0 mL×1) and CH<sub>2</sub>Cl<sub>2</sub> (15.0 mL×2). The combined organic layer was dried over anhydrous sodium sulfate and evaporated under reduced pressure to afford the mixture for <sup>1</sup>HNMR analysis to determine diastereoselectivity.

**Standard reaction condition:** catalyst **C1**, room temperature, product **3ai**, dr 5:1.

**Experiment 1:** catalyst **C1**, heating at 60 °C: product **3ai**, dr 3:1.

**Experiment 2:** After standard reaction was complete, the reaction mixture was extracted with EA (20.0 mL×1) and CH<sub>2</sub>Cl<sub>2</sub> (15.0 mL×2). The combined organic layer was dried over anhydrous sodium sulfate and evaporated under reduced pressure to afford the mixture, which was filtrated through a short silica gel column to give the crude products. Then the crude products were dissolved in EA/H<sub>2</sub>O (0.6/1, 6.4 mL) and 20 mol% DIPEA (diisopropyl ethyl amine) was added to this mixture. The reaction was stirred at room temperature for 12 h, product **3ai**, dr 4:1.

**Experiment 3:** After standard reaction was complete, the reaction mixture was extracted with EA (20.0 mL×1) and CH<sub>2</sub>Cl<sub>2</sub> (15.0 mL×2). The combined organic layer was dried over anhydrous sodium sulfate and evaporated under reduced pressure to afford the crude products. The crude products were dissolved in EA/H<sub>2</sub>O (0.6/1, 6.4 mL) and 20 mol% K<sub>2</sub>CO<sub>3</sub> was added to this mixture. The reaction was stirred at room temperature for 12 h, product **3ai**, dr 3:1.

**Experiment 4:** using 2 mol% **C4** instead of **C1**: product **3ai**, dr 2.5:1.

**Experiment 5:** using 2 mol% **C5** instead of **C1**: product **3ai**, dr 4:1.

**Experiment 6:** using 2 mol% **C7** (epimer of **C5**, **chiral**) instead of **C1**: product **3ai**, dr 3:1.

**Experiment 7:** using 2 mol% **C1**, room temperature, product **3t**, dr 5:1

**Experiment 8:** using 2 mol% **C4** instead of **C1**, room temperature, product **3t**, dr 3:1

## X-ray crystallographic data

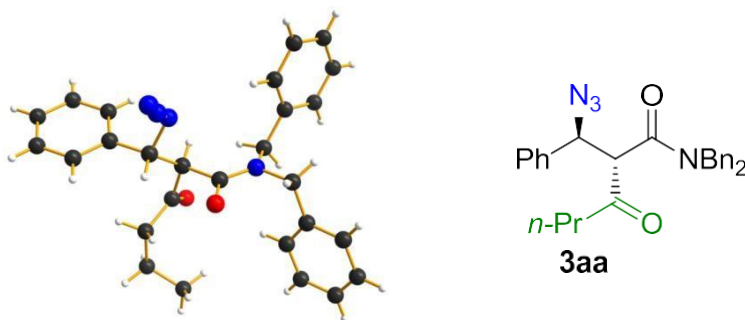

**Table 1: Crystal data and structure refinement for 3aa**

|                                             |                                                                |
|---------------------------------------------|----------------------------------------------------------------|
| Empirical formula                           | C <sub>27</sub> H <sub>28</sub> N <sub>4</sub> O <sub>2</sub>  |
| Formula weight                              | 440.53                                                         |
| Temperature/K                               | 298 (2)                                                        |
| Crystal system                              | monoclinic                                                     |
| Space group                                 | C2/c                                                           |
| a/Å                                         | 22.679 (7)                                                     |
| b/Å                                         | 10.176 (3)                                                     |
| c/Å                                         | 21.562 (6)                                                     |
| $\alpha$ /°                                 | 90                                                             |
| $\beta$ /°                                  | 94.879 (4)                                                     |
| $\gamma$ /°                                 | 90                                                             |
| Volume/Å <sup>3</sup>                       | 4958 (2)                                                       |
| Z                                           | 8                                                              |
| $\rho_{\text{calc}}/\text{cm}^{-3}$         | 1.180                                                          |
| $\mu/\text{mm}^{-1}$                        | 0.076                                                          |
| F(000)                                      | 1872.0                                                         |
| Crystal size/mm <sup>3</sup>                | 0.100 × 0.040 × 0.020                                          |
| Radiation                                   | MoK $\alpha$ ( $\lambda$ = 0.71073)                            |
| 2 $\theta$ range for data collection/°      | 3.604 to 49.99                                                 |
| Index ranges                                | -15 ≤ h ≤ 26, -12 ≤ k ≤ 12, -25 ≤ l ≤ 25                       |
| Reflections collected                       | 14327                                                          |
| Independent reflections                     | 4364 [ $R_{\text{int}}$ = 0.0386, $R_{\text{sigma}}$ = 0.0419] |
| Data/restraints/parameters                  | 4364/48/300                                                    |
| Goodness-of-fit on F <sup>2</sup>           | 1.009                                                          |
| Final R indexes [ $I \geq 2\sigma(I)$ ]     | $R_1$ = 0.0444, $wR_2$ = 0.0939                                |
| Final R indexes [all data]                  | $R_1$ = 0.0967, $wR_2$ = 0.1222                                |
| Largest diff. peak/hole / e Å <sup>-3</sup> | 0.14/-0.15                                                     |



## Copies of NMR spectra

$^1\text{H}$  NMR spectrum of compound **4b'** ( $\text{CDCl}_3$ , 400MHz)

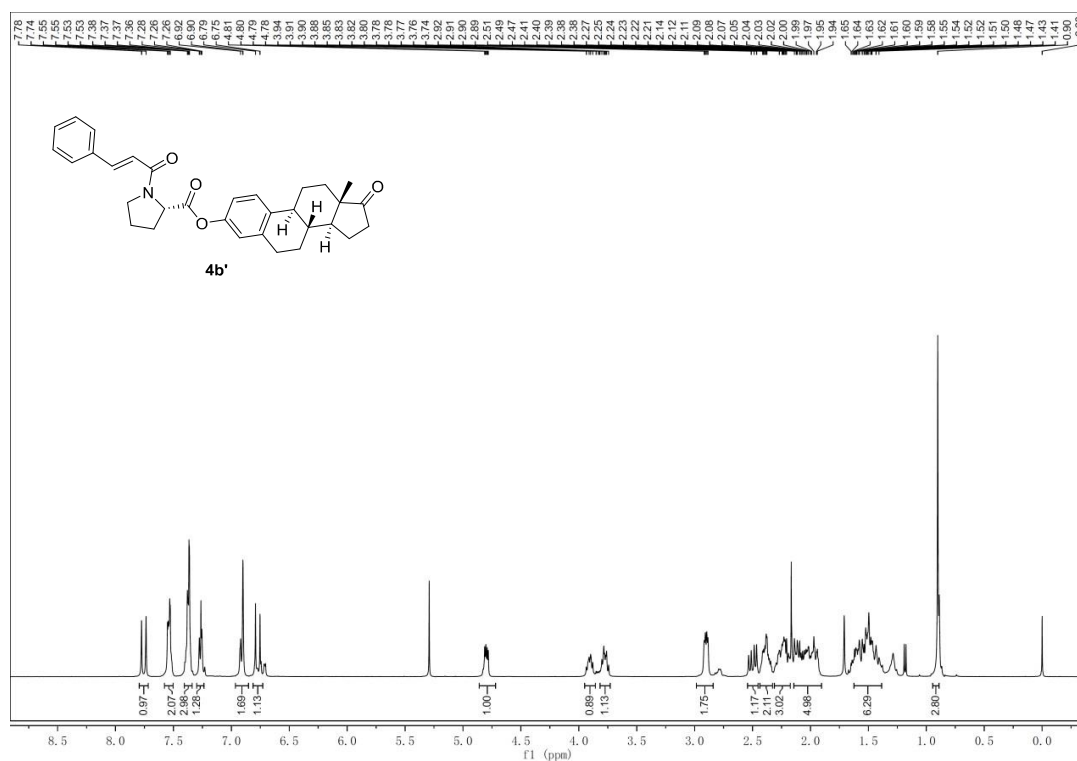

$^{13}\text{C}$  NMR spectrum of compound **4b'** ( $\text{CDCl}_3$ , 100MHz)

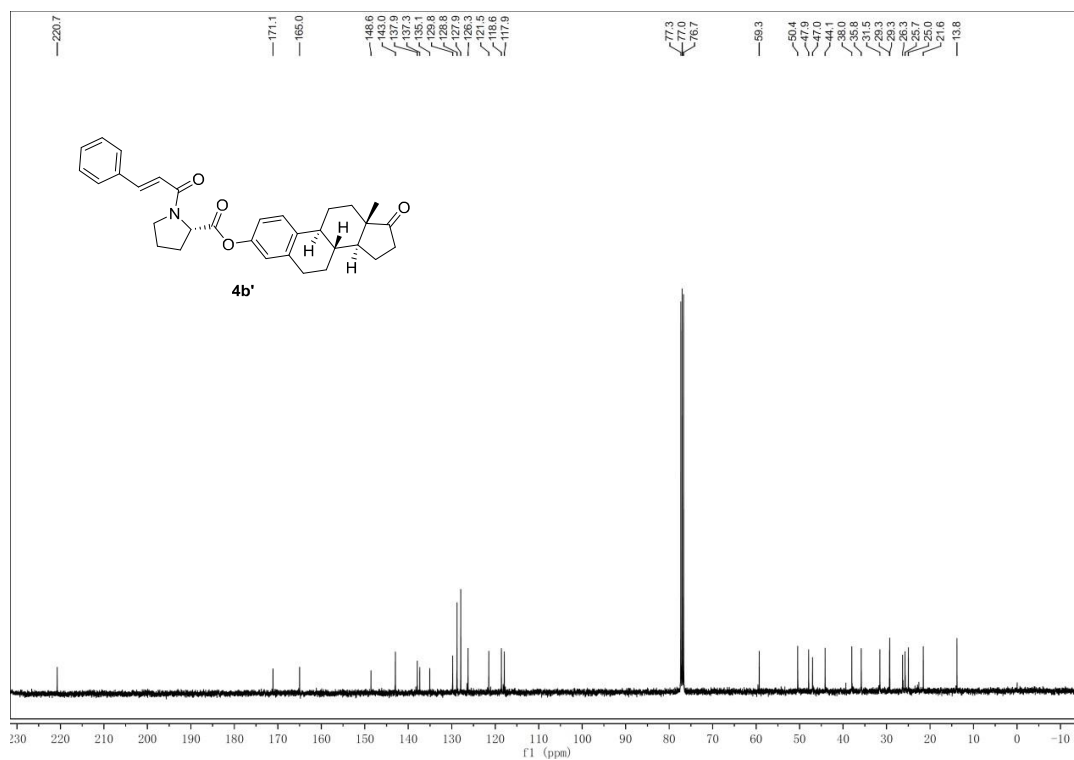

$^1\text{H}$  NMR spectrum of compound **5a'** ( $\text{CDCl}_3$ , 400MHz)

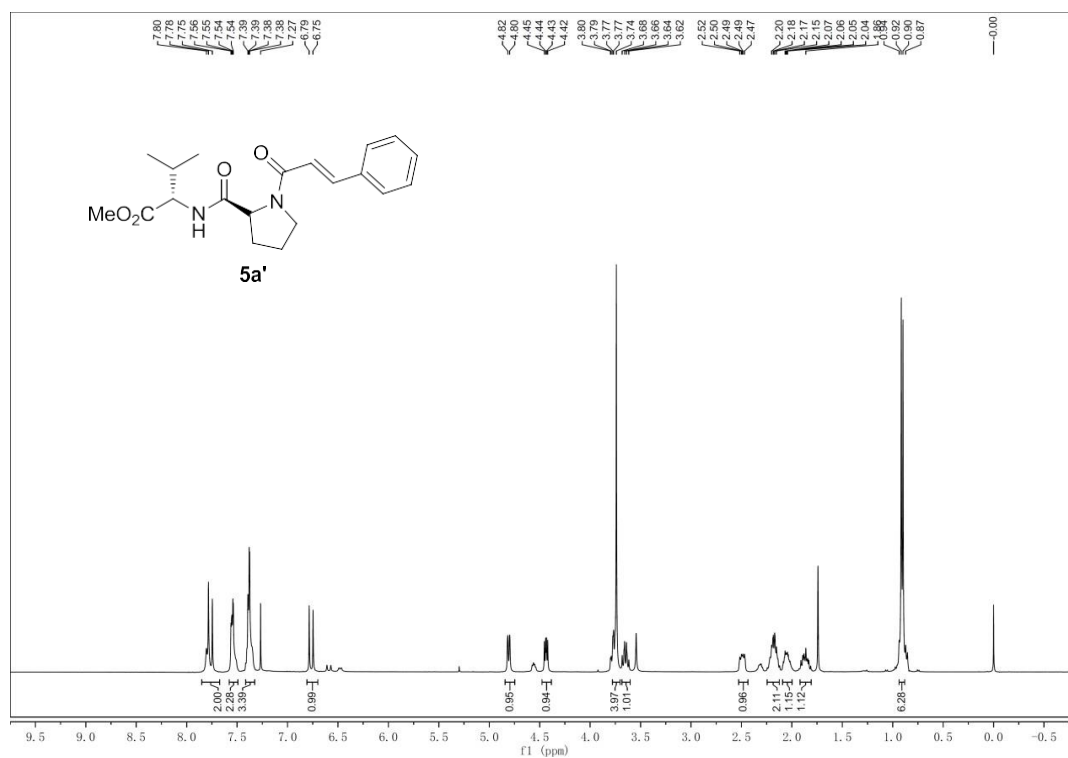

$^{13}\text{C}$  NMR spectrum of compound **5a'** ( $\text{CDCl}_3$ , 100MHz)

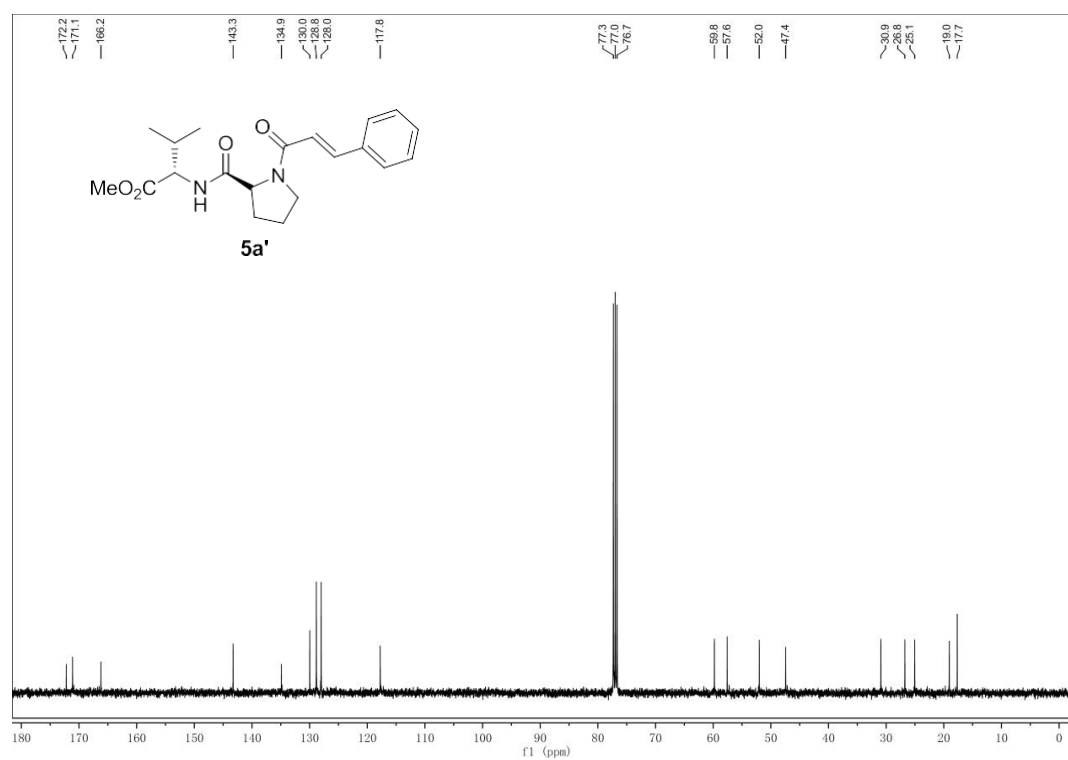

$^1\text{H}$  NMR spectrum of compound **5b'** ( $\text{CDCl}_3$ , 400MHz)

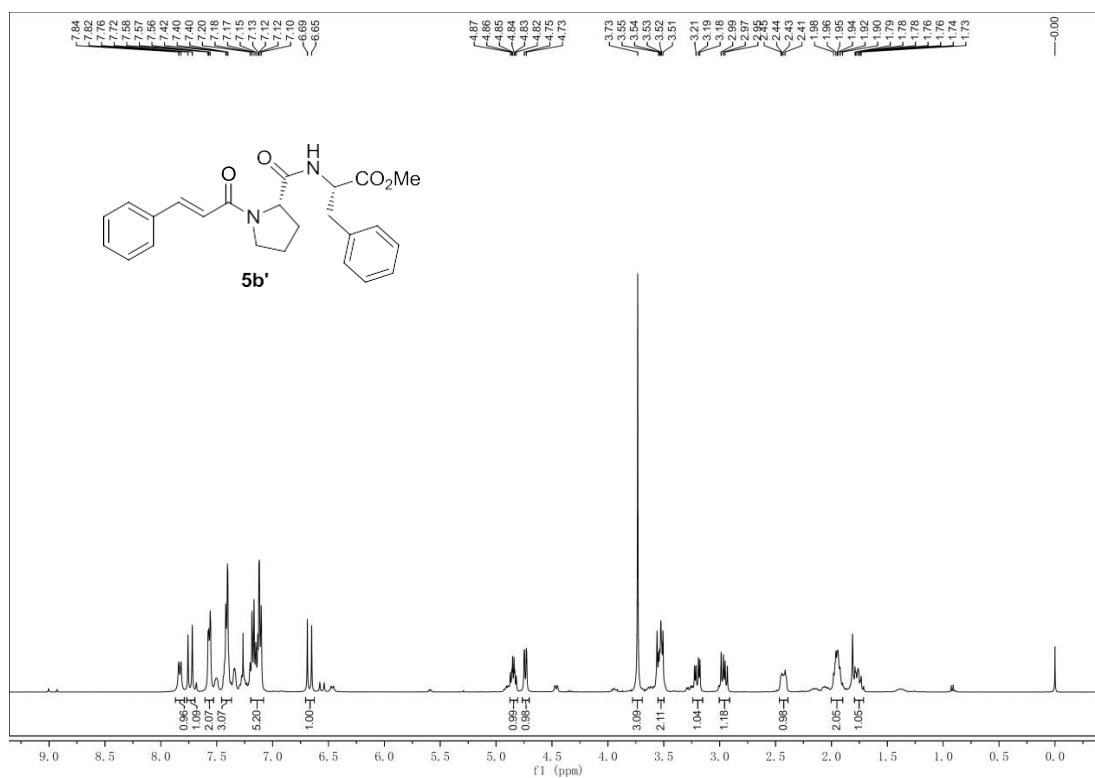

$^{13}\text{C}$  NMR spectrum of compound **5b'** ( $\text{CDCl}_3$ , 100MHz)

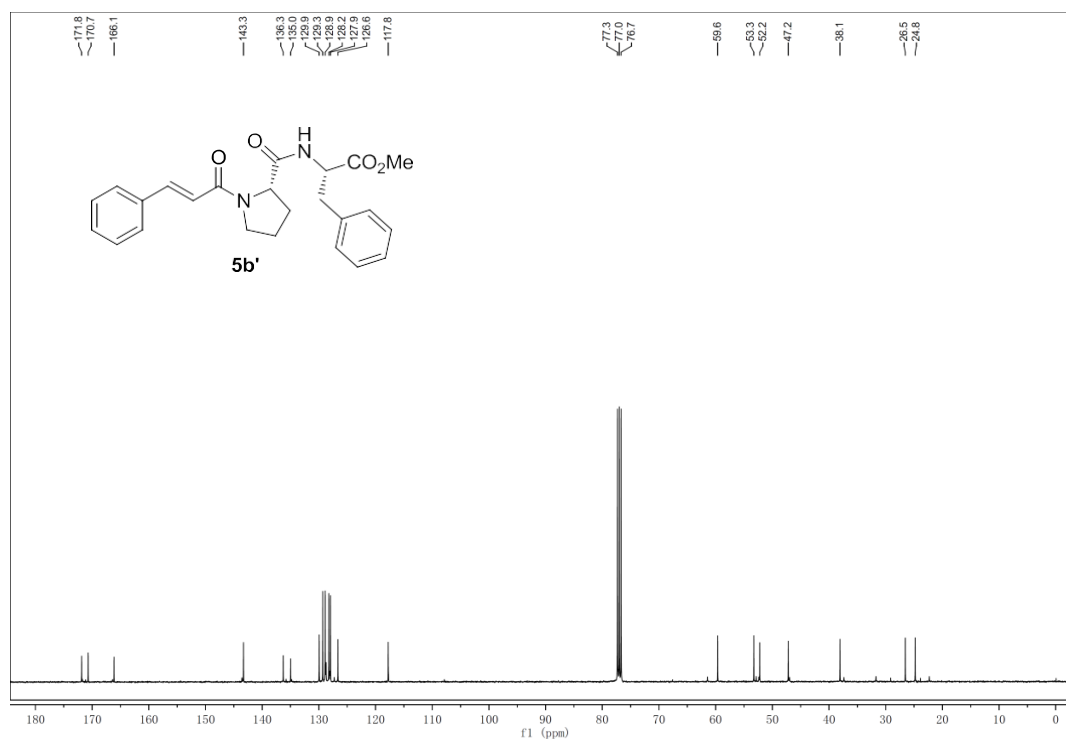

$^1\text{H}$  NMR spectrum of compound **3a** ( $\text{CDCl}_3$ , 400MHz)

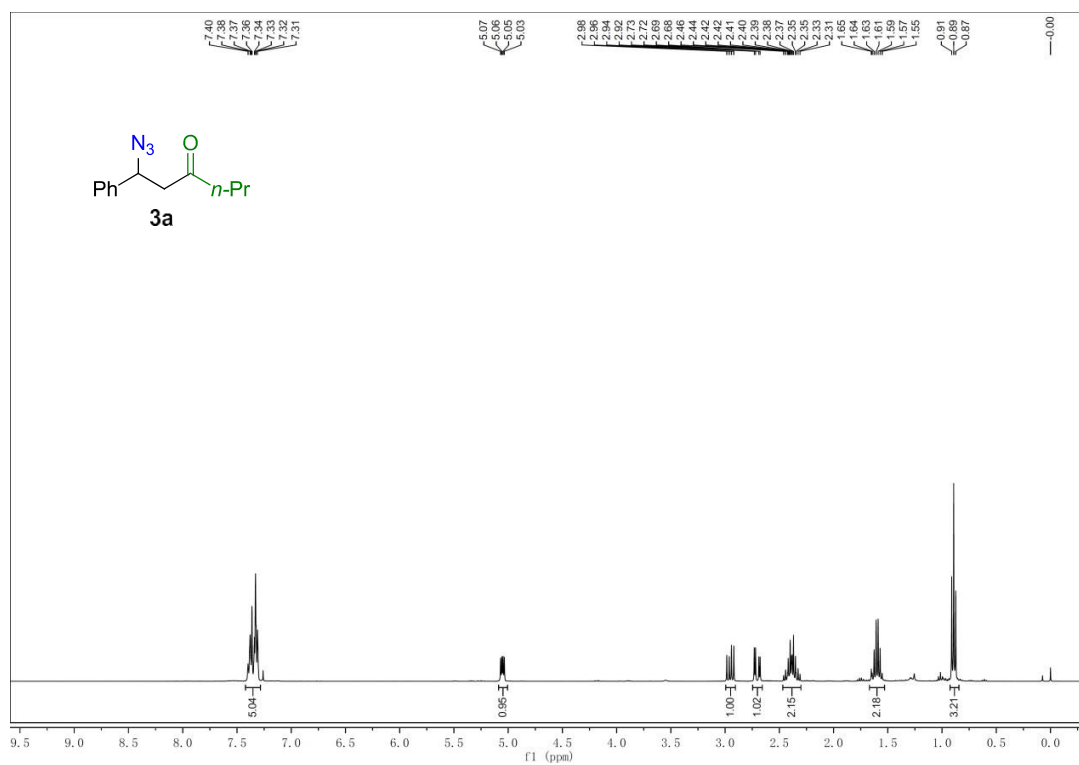

$^{13}\text{C}$  NMR spectrum of compound **3a** ( $\text{CDCl}_3$ , 100MHz)

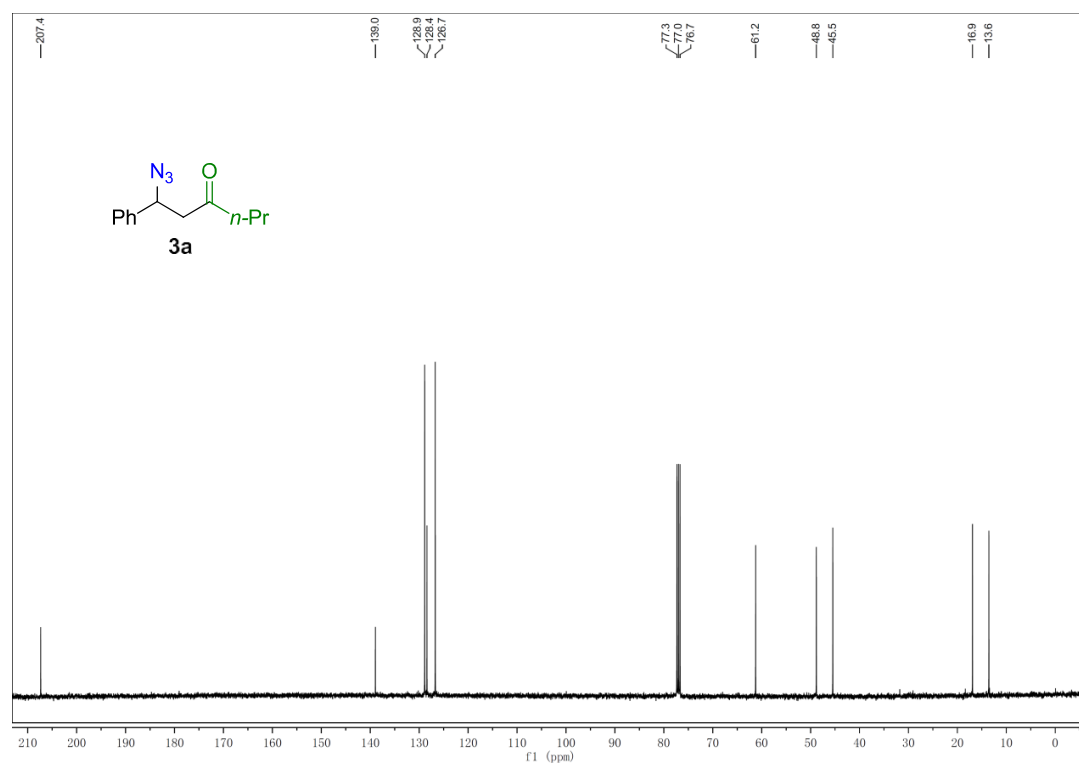

$^1\text{H}$  NMR spectrum of compound **3b** ( $\text{CDCl}_3$ , 400MHz)

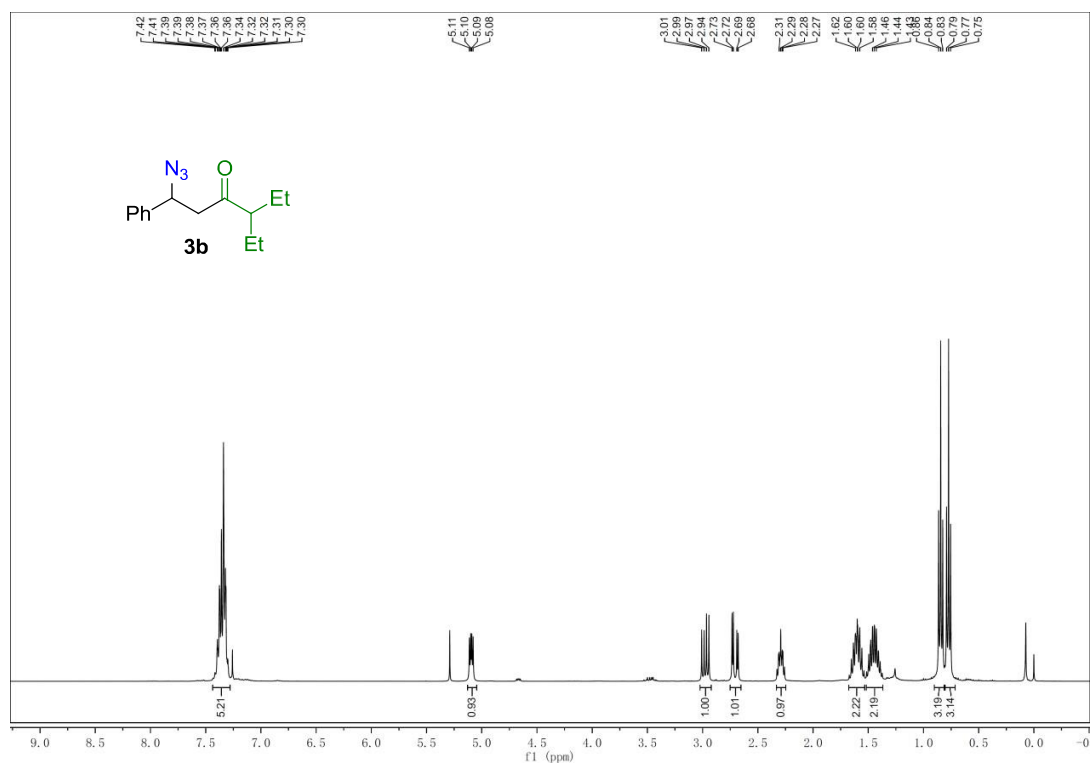

$^{13}\text{C}$  NMR spectrum of compound **3b** ( $\text{CDCl}_3$ , 100MHz)

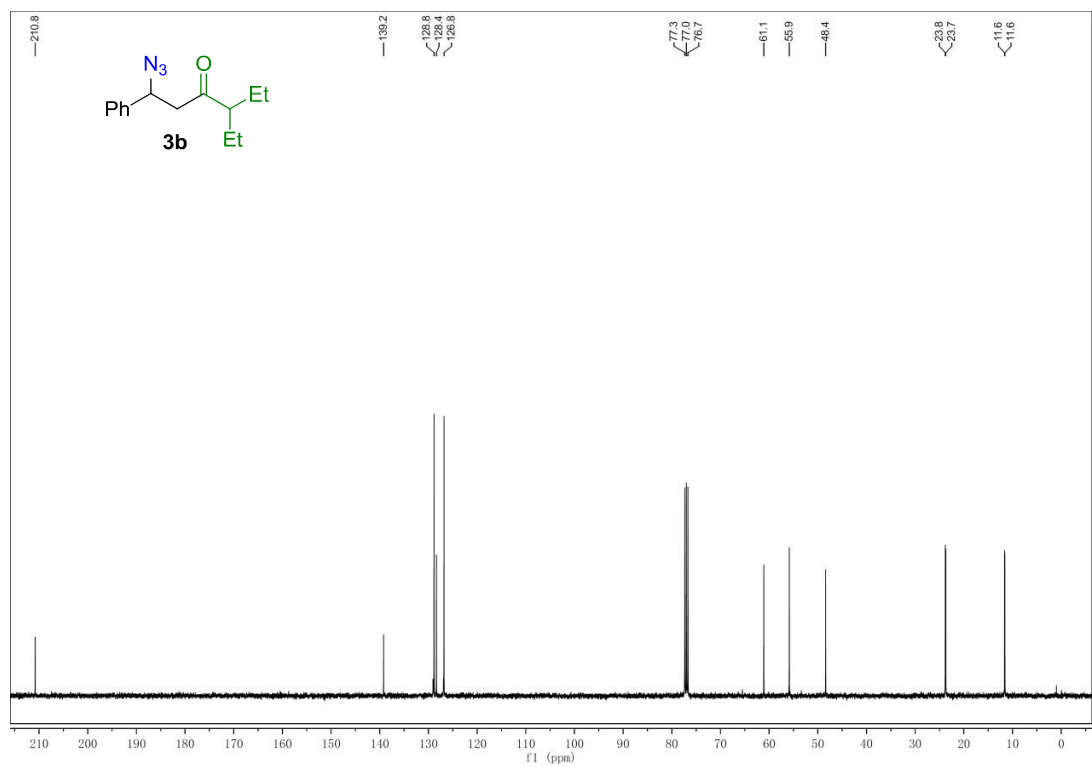

$^1\text{H}$  NMR spectrum of compound **3c** ( $\text{CDCl}_3$ , 400MHz)

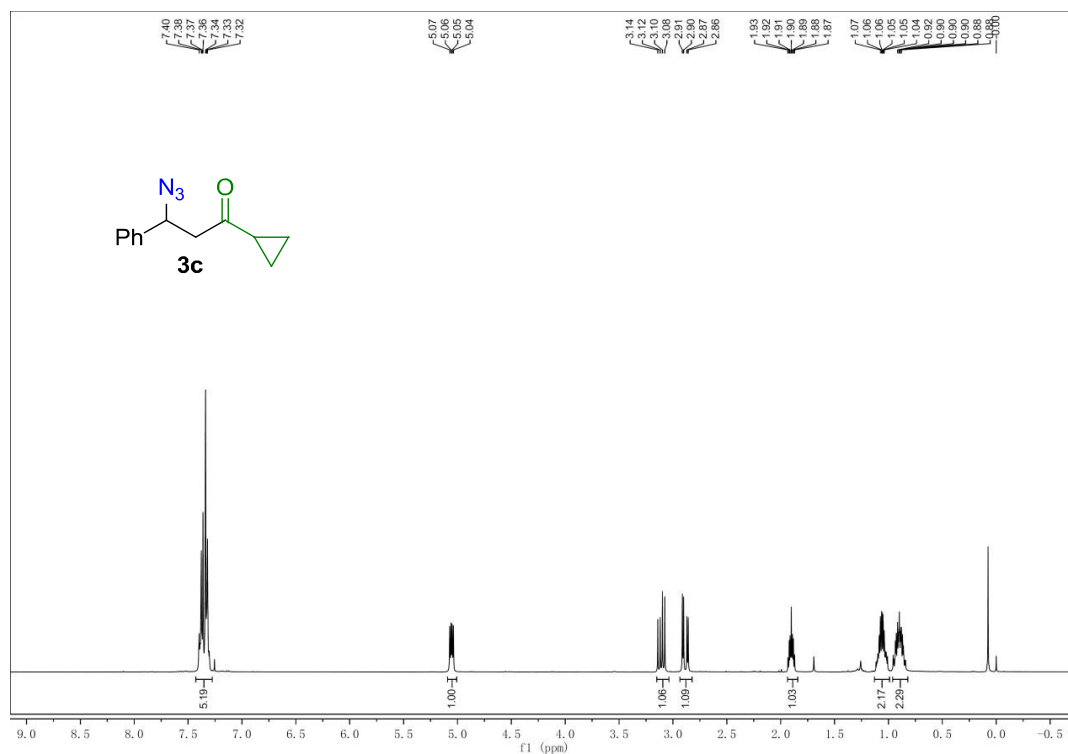

$^{13}\text{C}$  NMR spectrum of compound **3c** ( $\text{CDCl}_3$ , 100MHz)

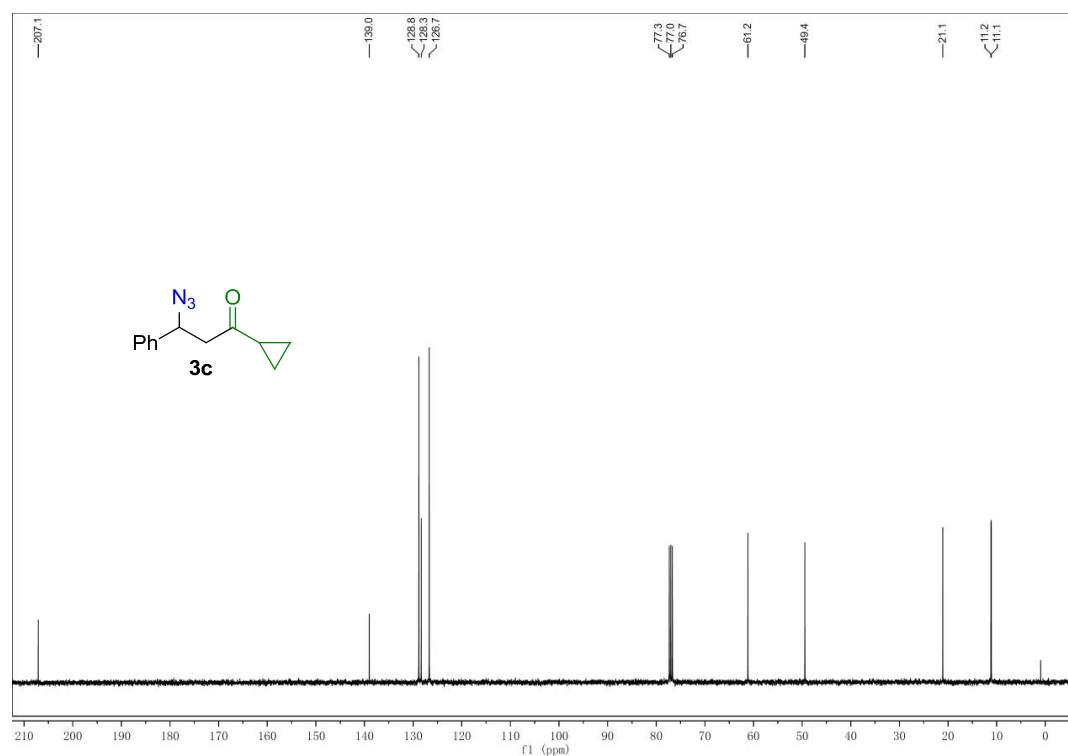

$^1\text{H}$  NMR spectrum of compound **3d** ( $\text{CDCl}_3$ , 400MHz)

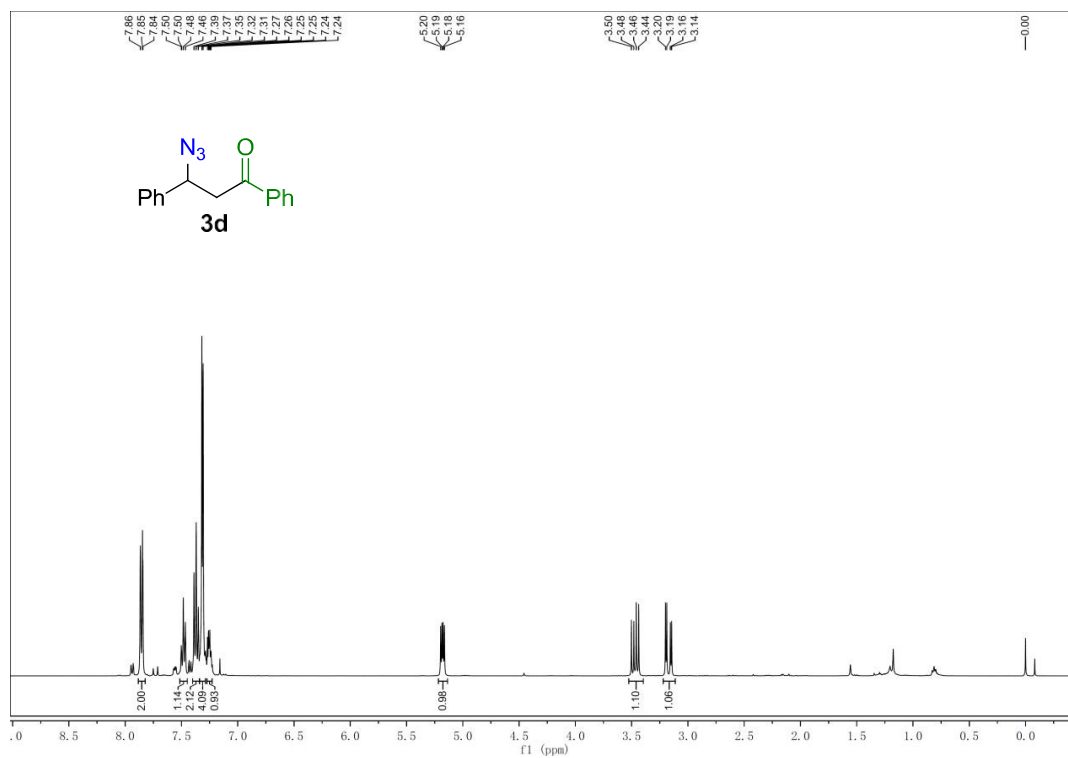

$^{13}\text{C}$  NMR spectrum of compound **3d** ( $\text{CDCl}_3$ , 100MHz)

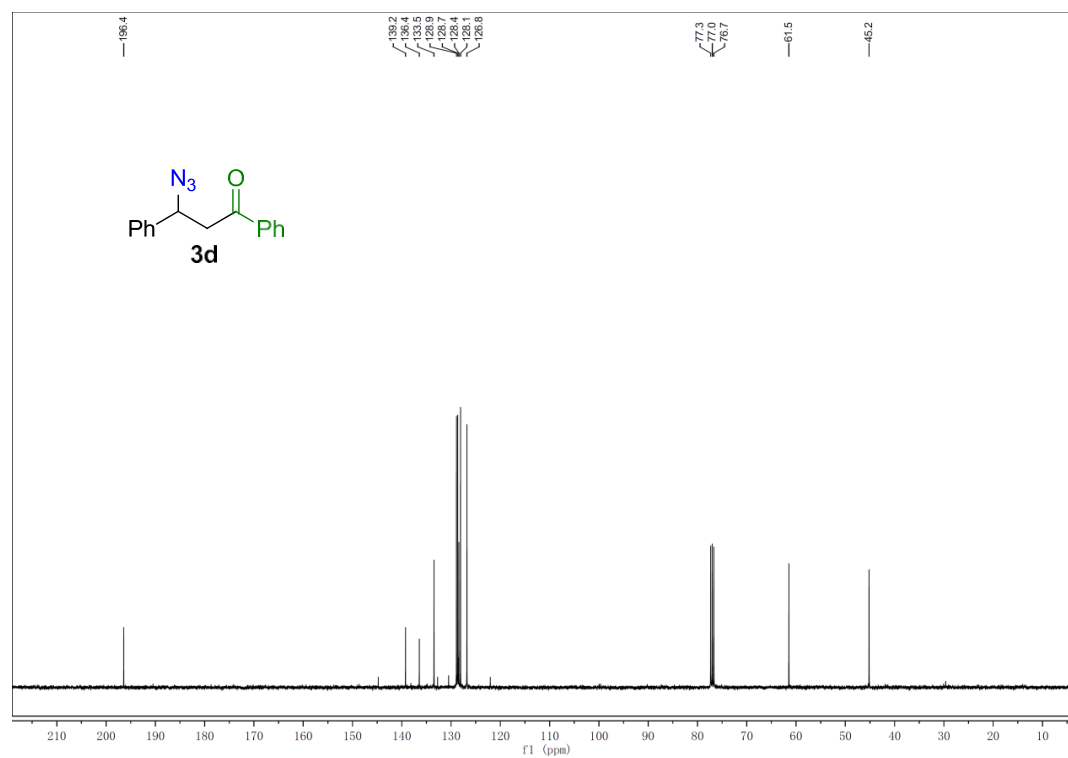

<sup>1</sup>H NMR spectrum of compound **3e** (CDCl<sub>3</sub>, 400MHz)

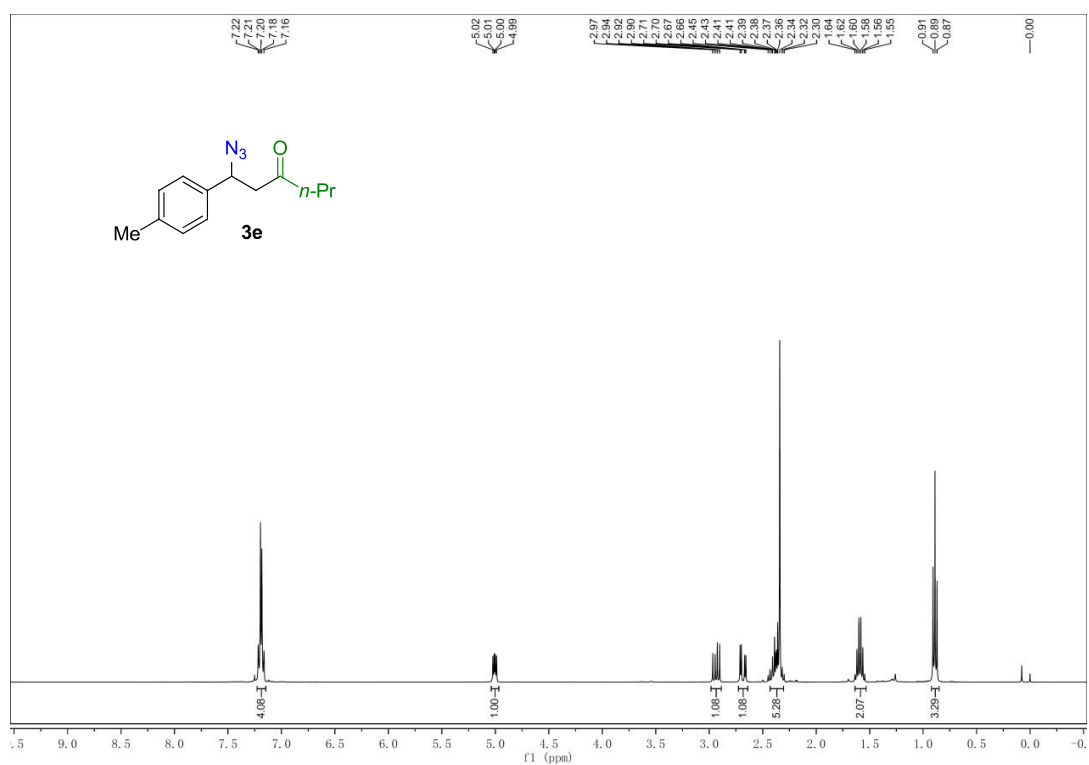

<sup>13</sup>C NMR spectrum of compound **3e** (CDCl<sub>3</sub>, 100MHz)

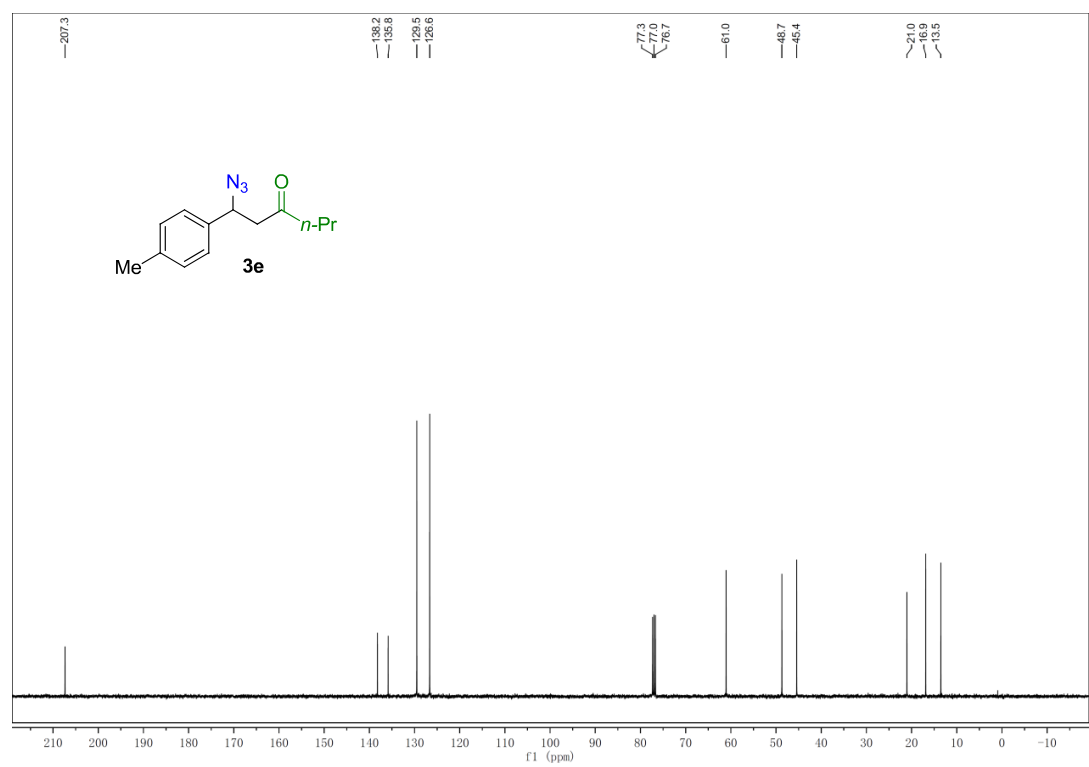



$^1\text{H}$  NMR spectrum of compound **3f** ( $\text{CDCl}_3$ , 400MHz)

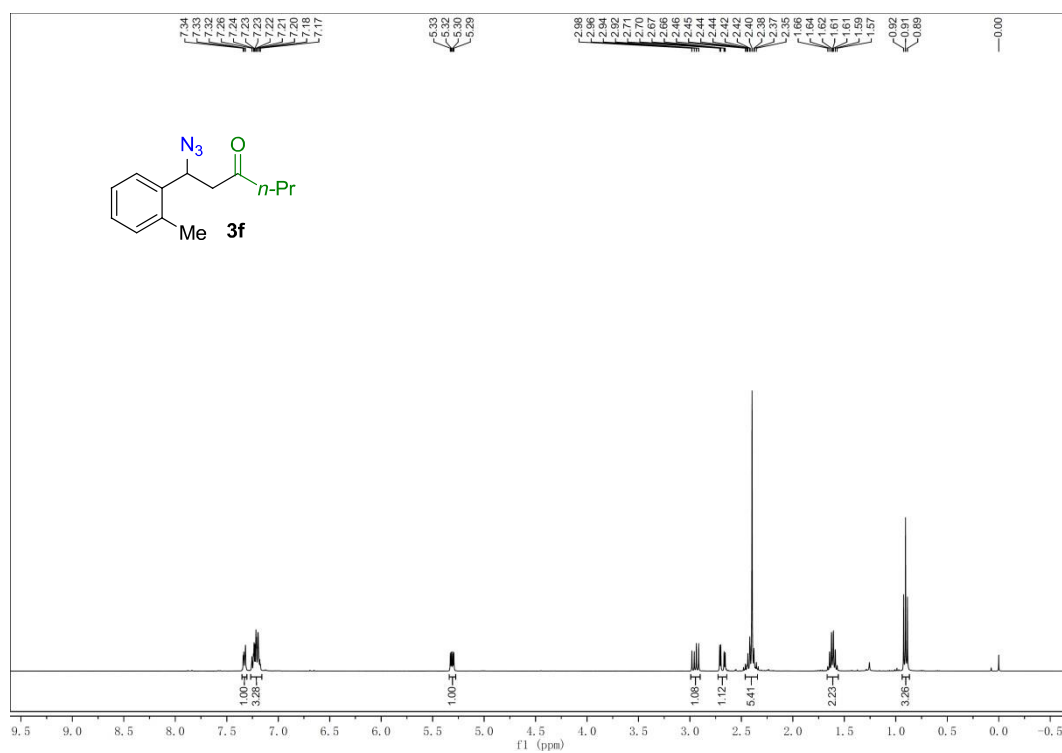

$^{13}\text{C}$  NMR spectrum of compound **3f** ( $\text{CDCl}_3$ , 100MHz)

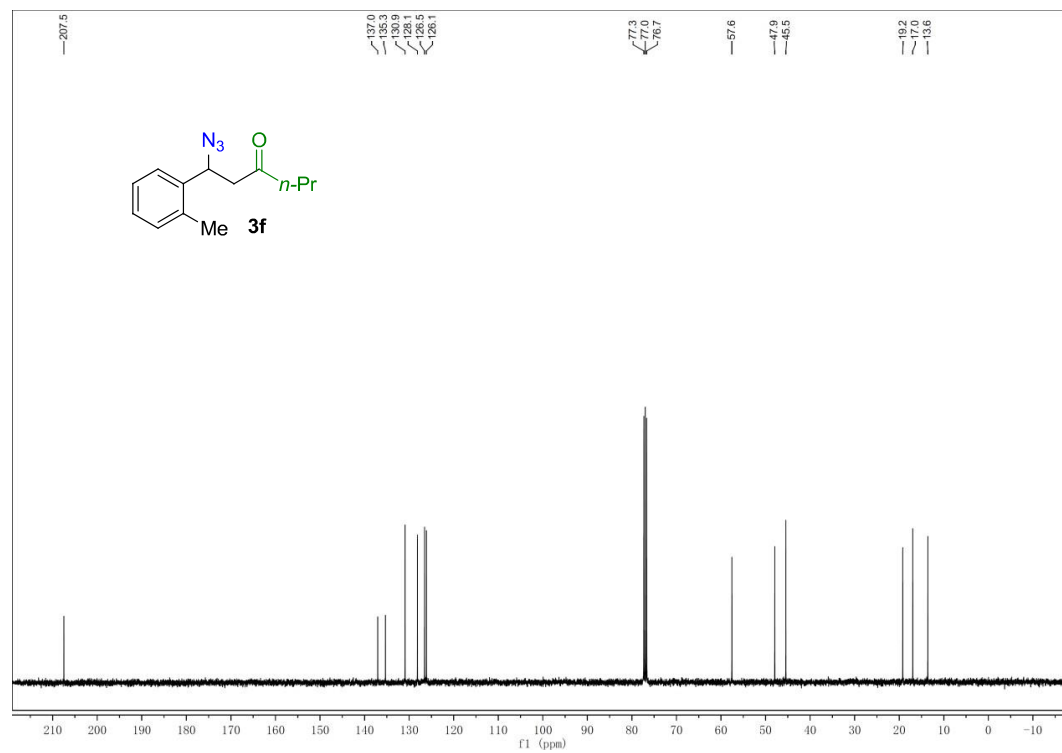

$^1\text{H}$  NMR spectrum of compound **3g** ( $\text{CDCl}_3$ , 400MHz)

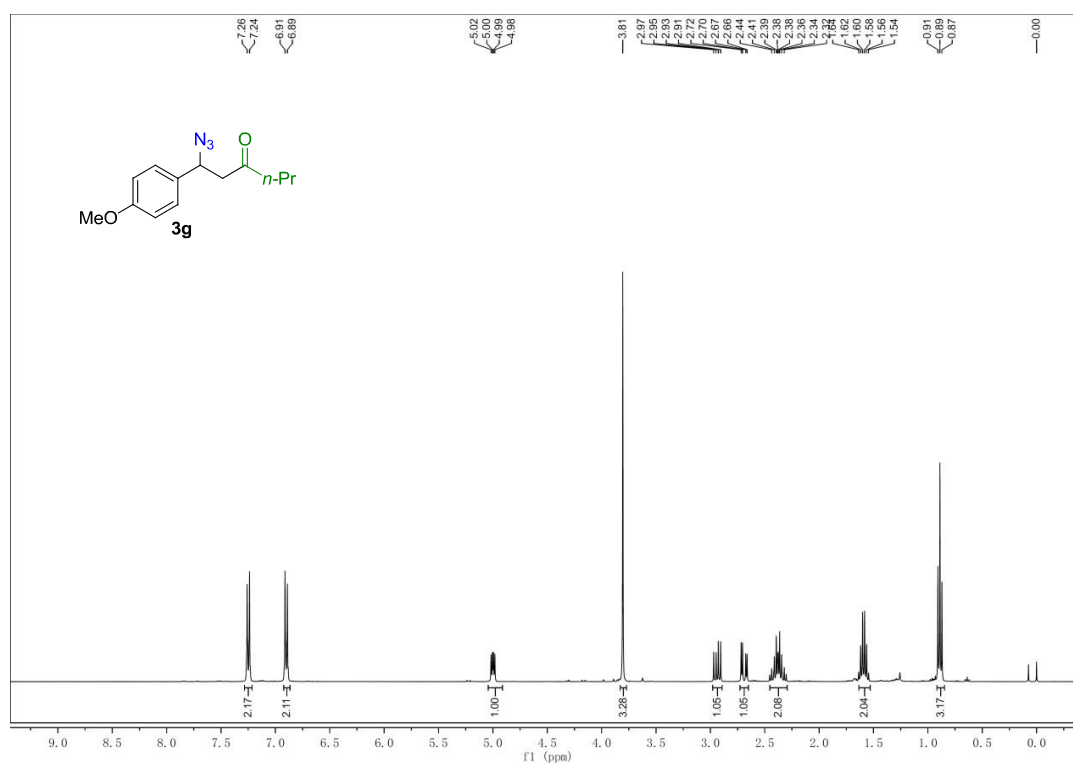

$^{13}\text{C}$  NMR spectrum of compound **3g** ( $\text{CDCl}_3$ , 100MHz)

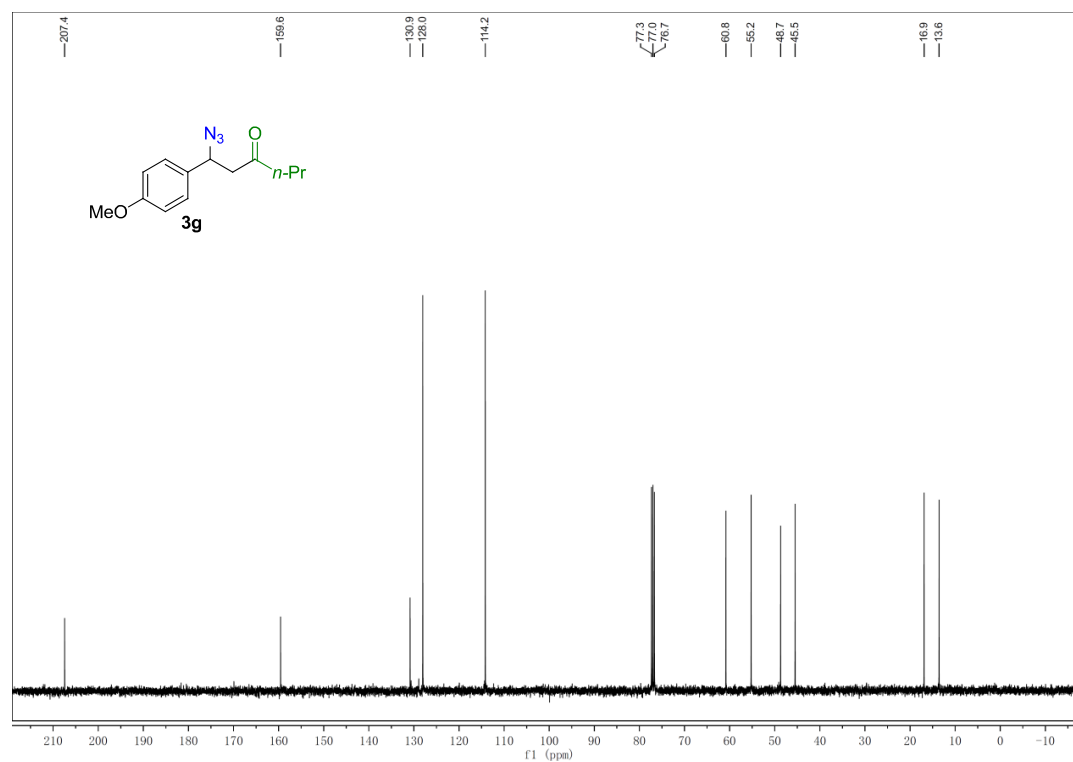

$^1\text{H}$  NMR spectrum of compound **3h** ( $\text{CDCl}_3$ , 400MHz)

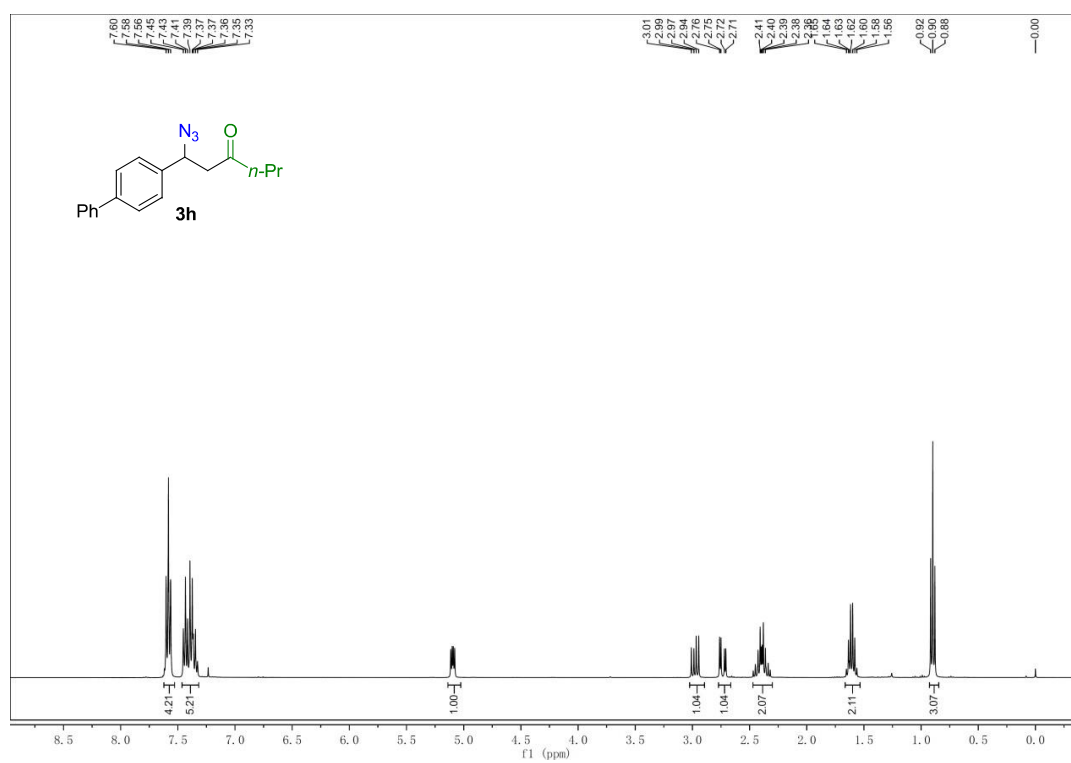

$^{13}\text{C}$  NMR spectrum of compound **3h** ( $\text{CDCl}_3$ , 100MHz)

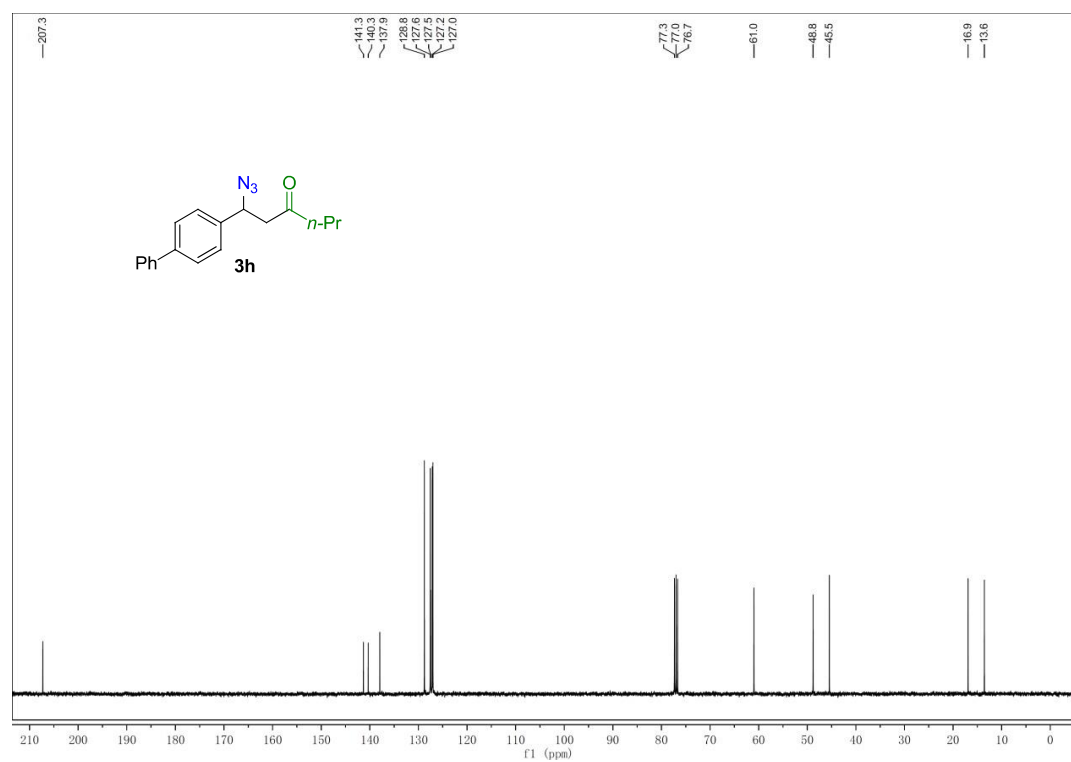

$^1\text{H}$  NMR spectrum of compound **3i** ( $\text{CDCl}_3$ , 400MHz)

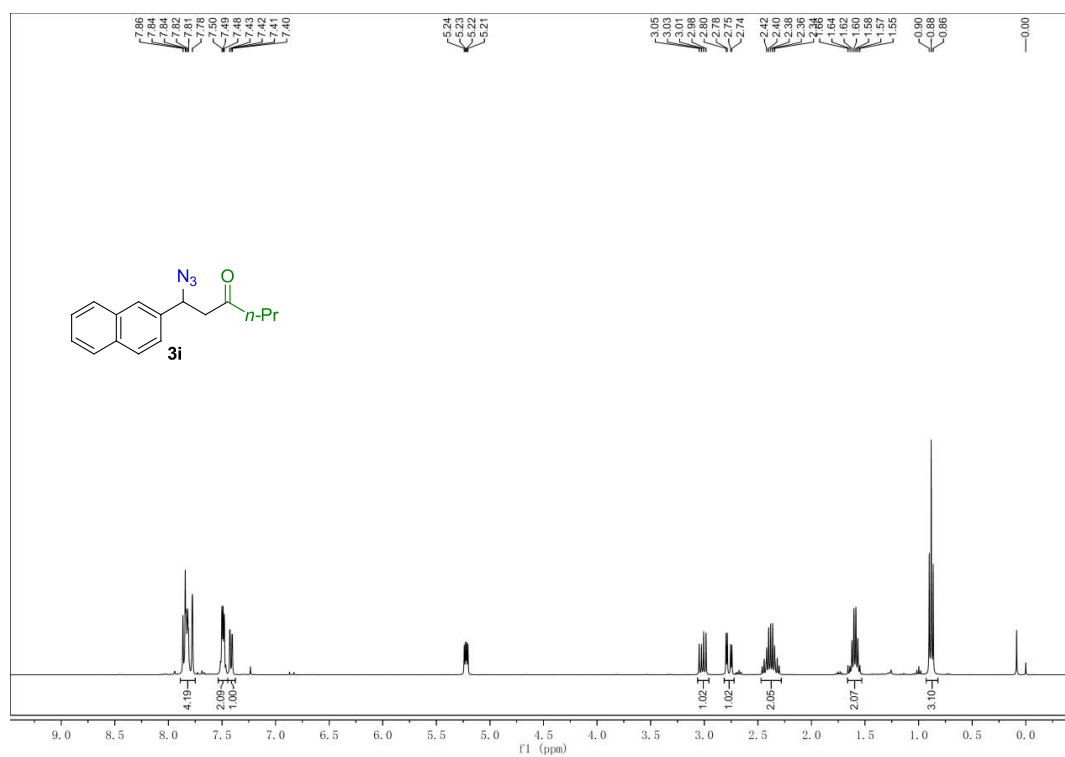

$^{13}\text{C}$  NMR spectrum of compound **3i** ( $\text{CDCl}_3$ , 100MHz)

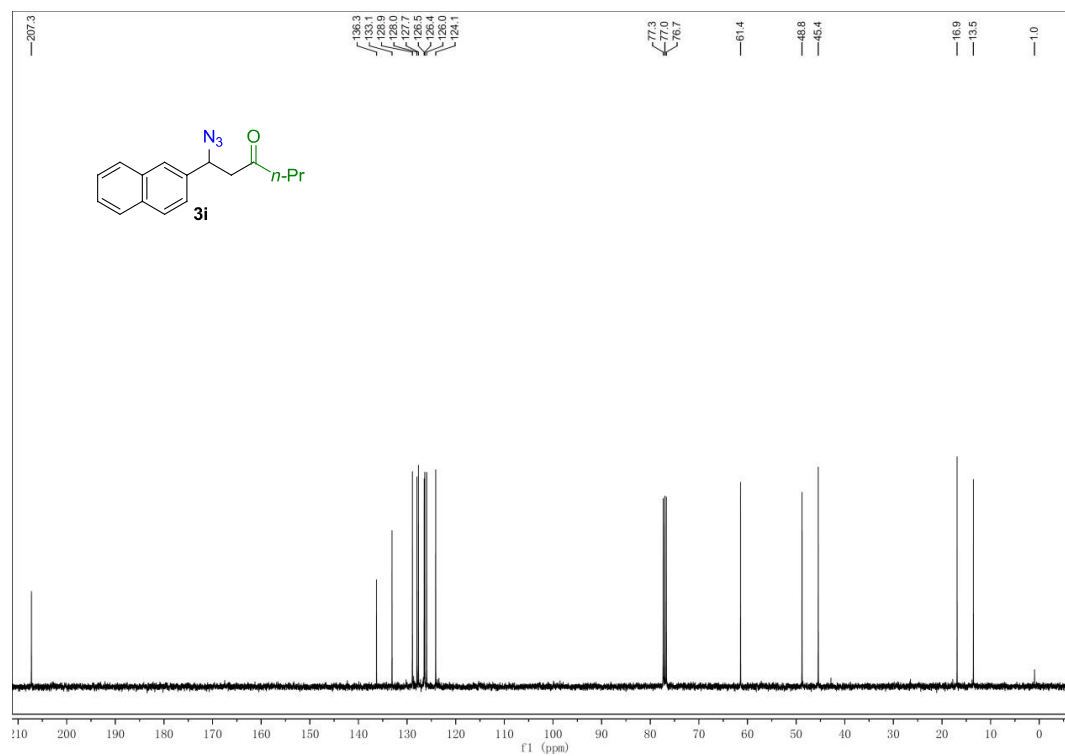

$^1\text{H}$  NMR spectrum of compound **3j** ( $\text{CDCl}_3$ , 400MHz)

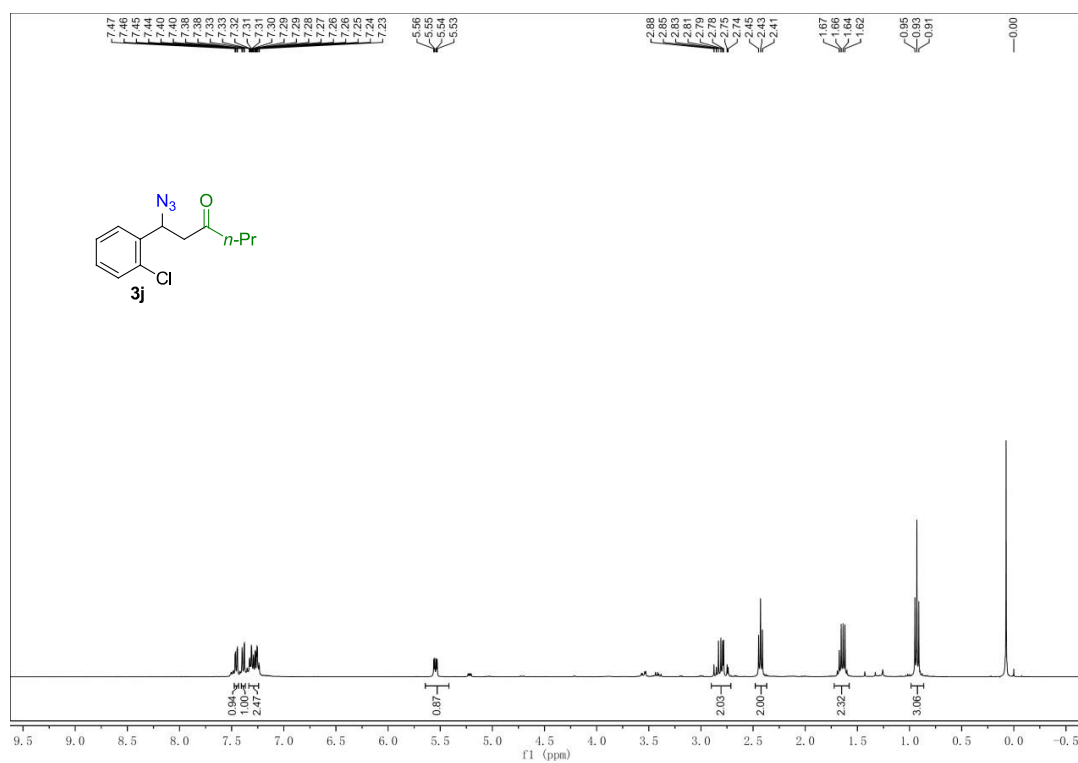

$^{13}\text{C}$  NMR spectrum of compound **3j** ( $\text{CDCl}_3$ , 100MHz)

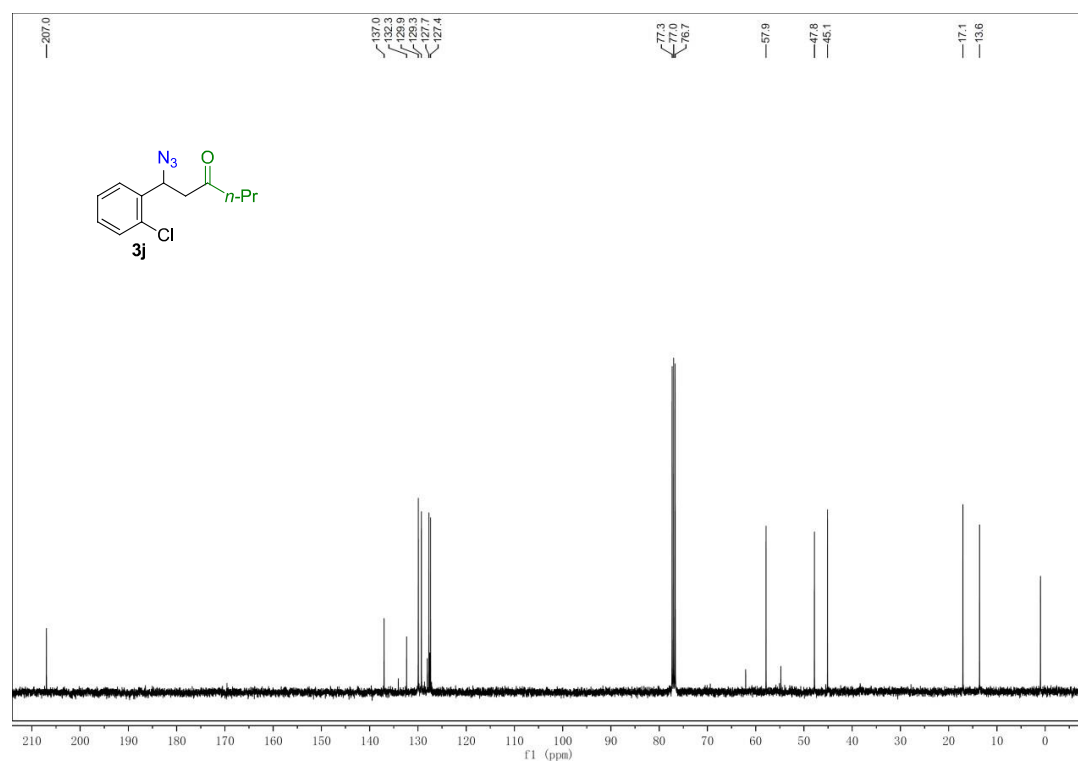

$^1\text{H}$  NMR spectrum of compound **3k** ( $\text{CDCl}_3$ , 400MHz)

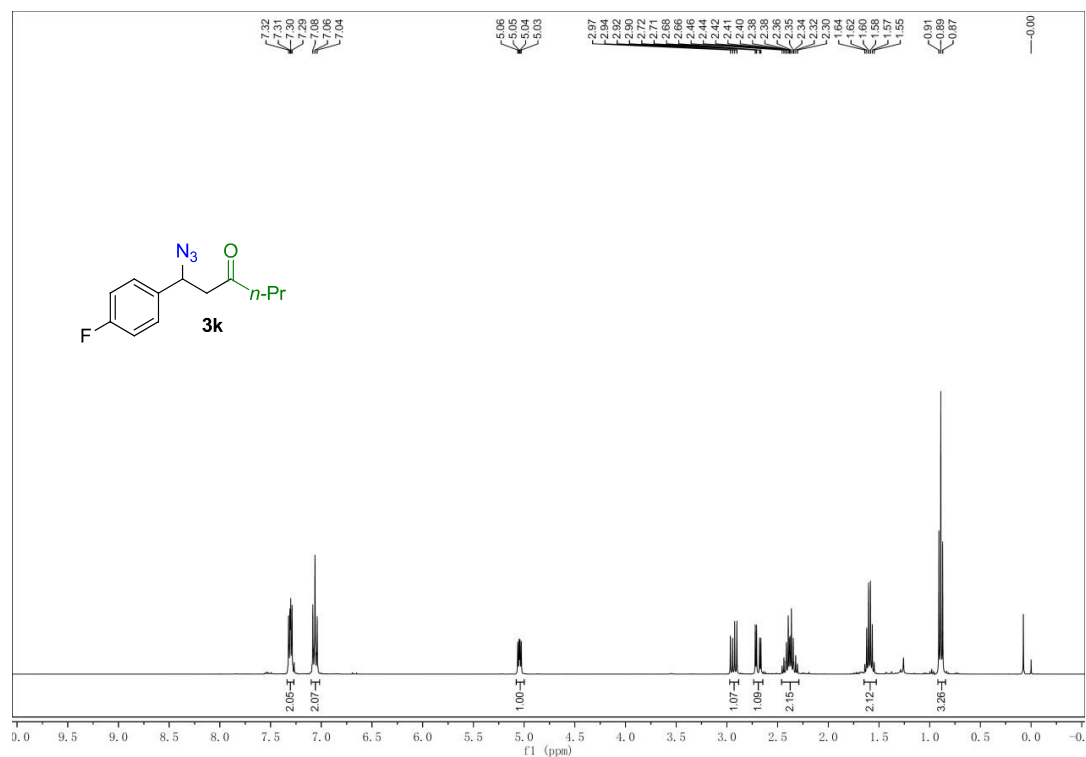

$^{13}\text{C}$  NMR spectrum of compound **3k** ( $\text{CDCl}_3$ , 100MHz)

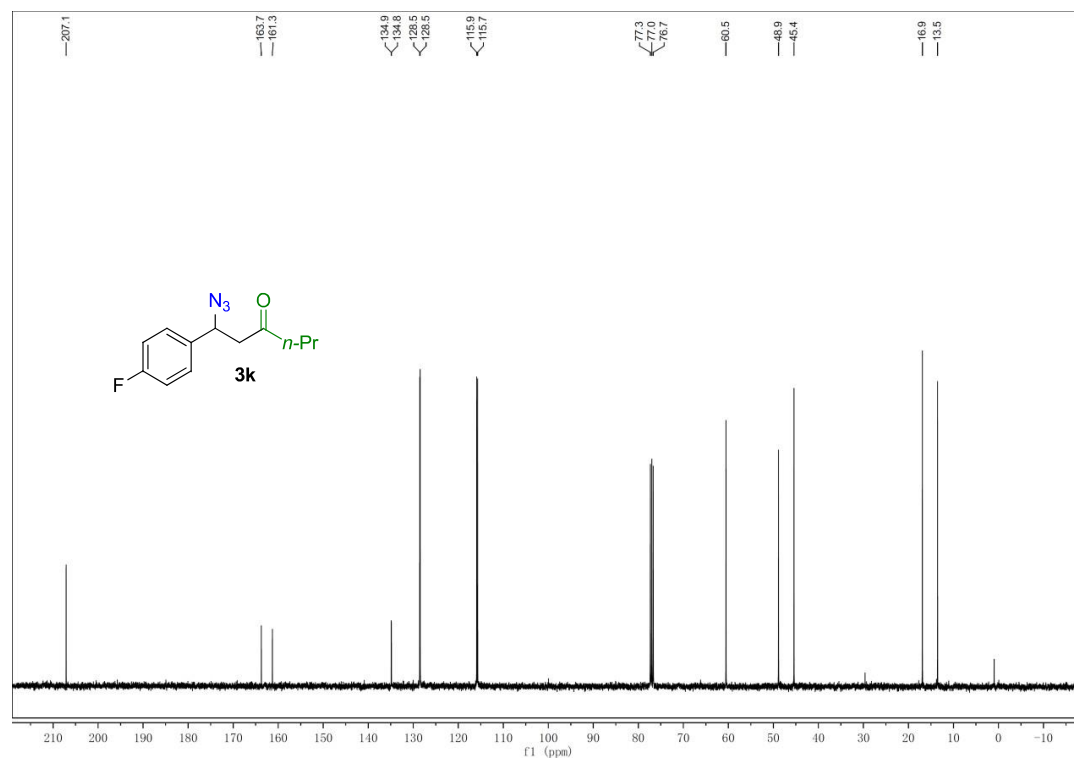

$^1\text{H}$  NMR spectrum of compound **3I** ( $\text{CDCl}_3$ , 400MHz)

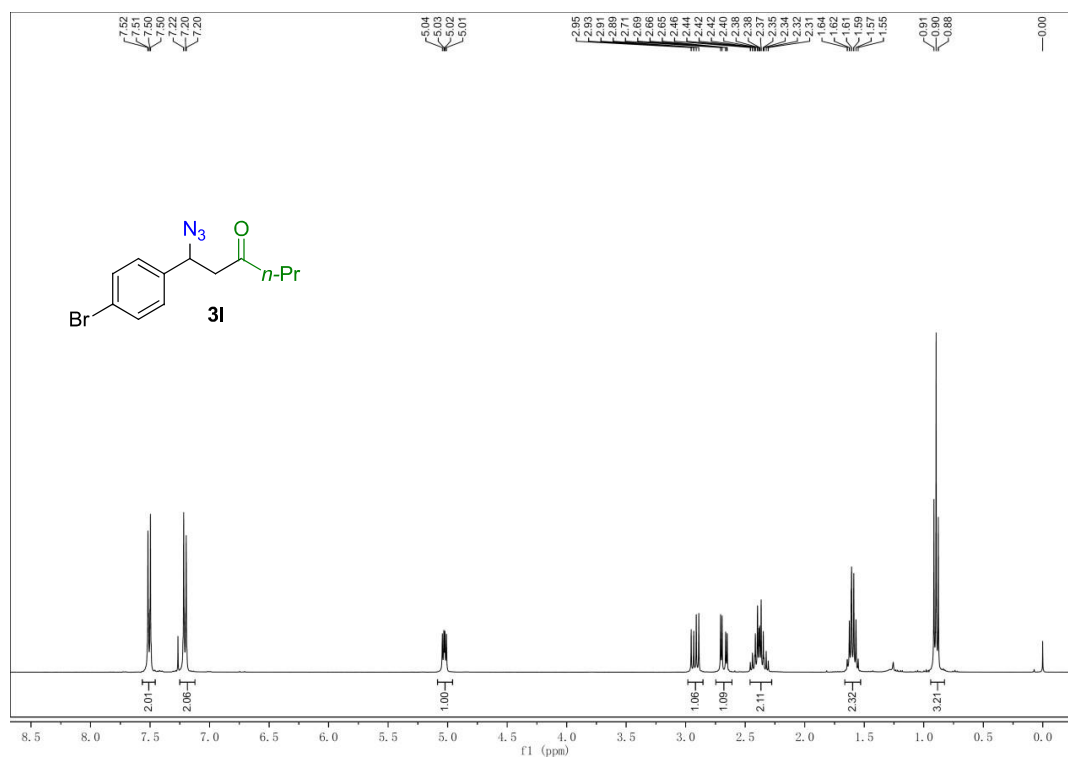

$^{13}\text{C}$  NMR spectrum of compound **3I** ( $\text{CDCl}_3$ , 100MHz)

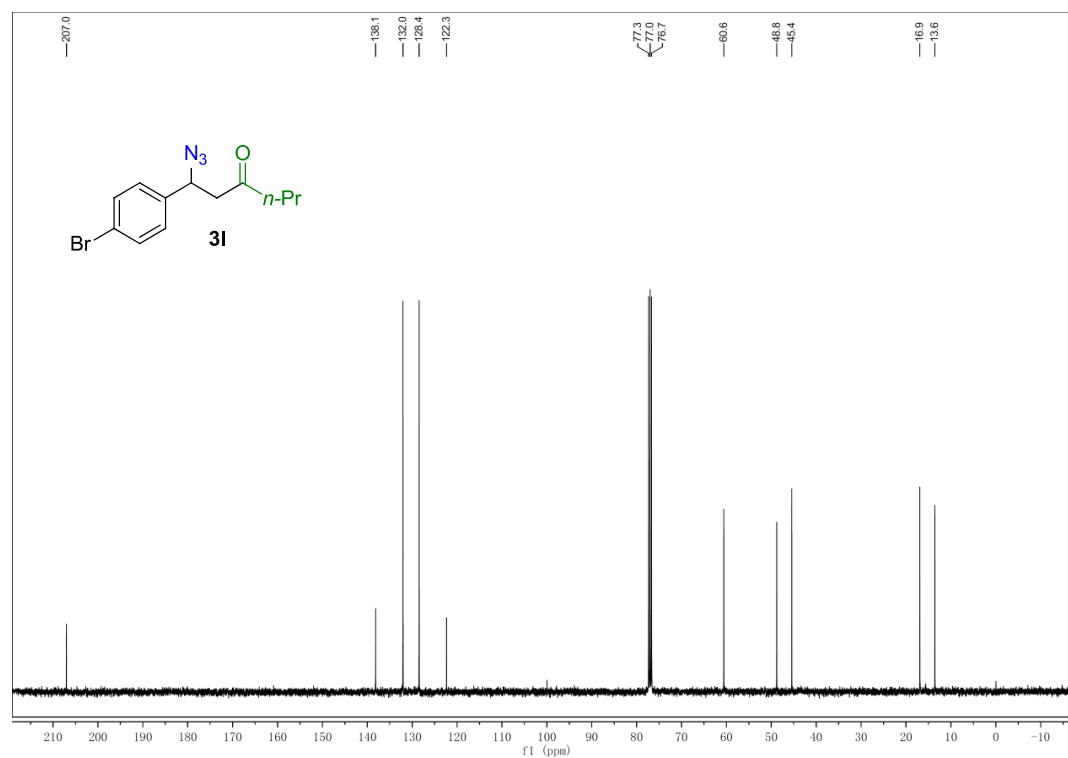

$^1\text{H}$  NMR spectrum of compound **3m** ( $\text{CDCl}_3$ , 400MHz)

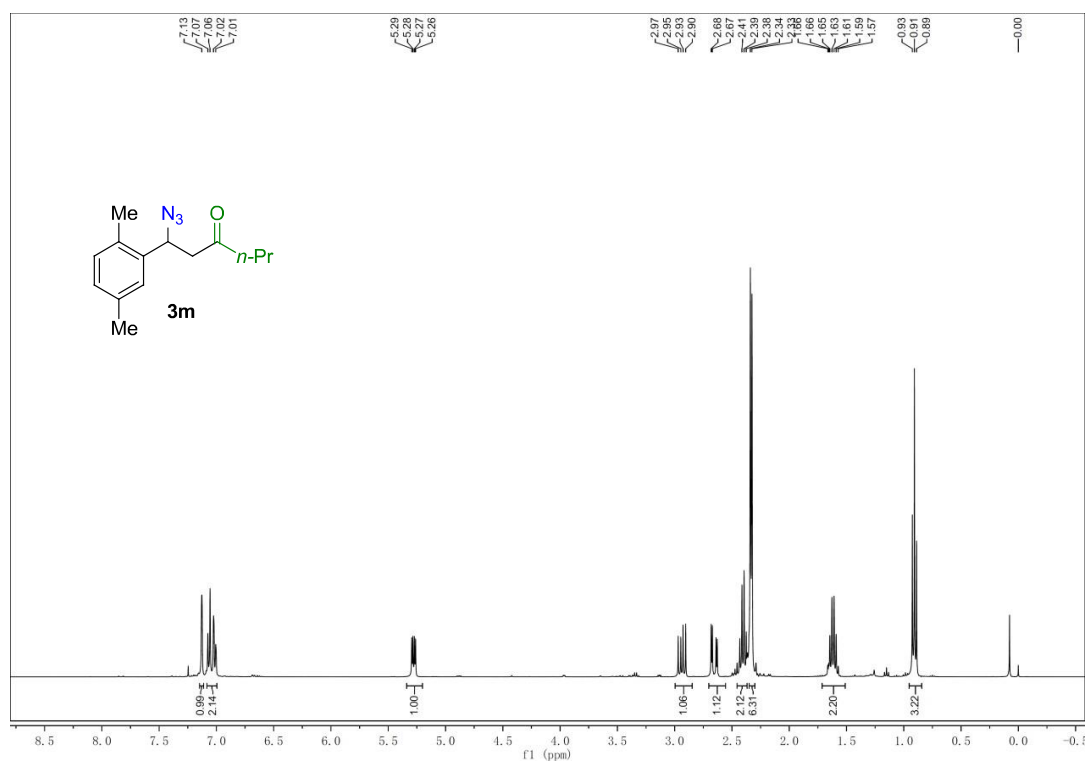

$^{13}\text{C}$  NMR spectrum of compound **3m** ( $\text{CDCl}_3$ , 100MHz)

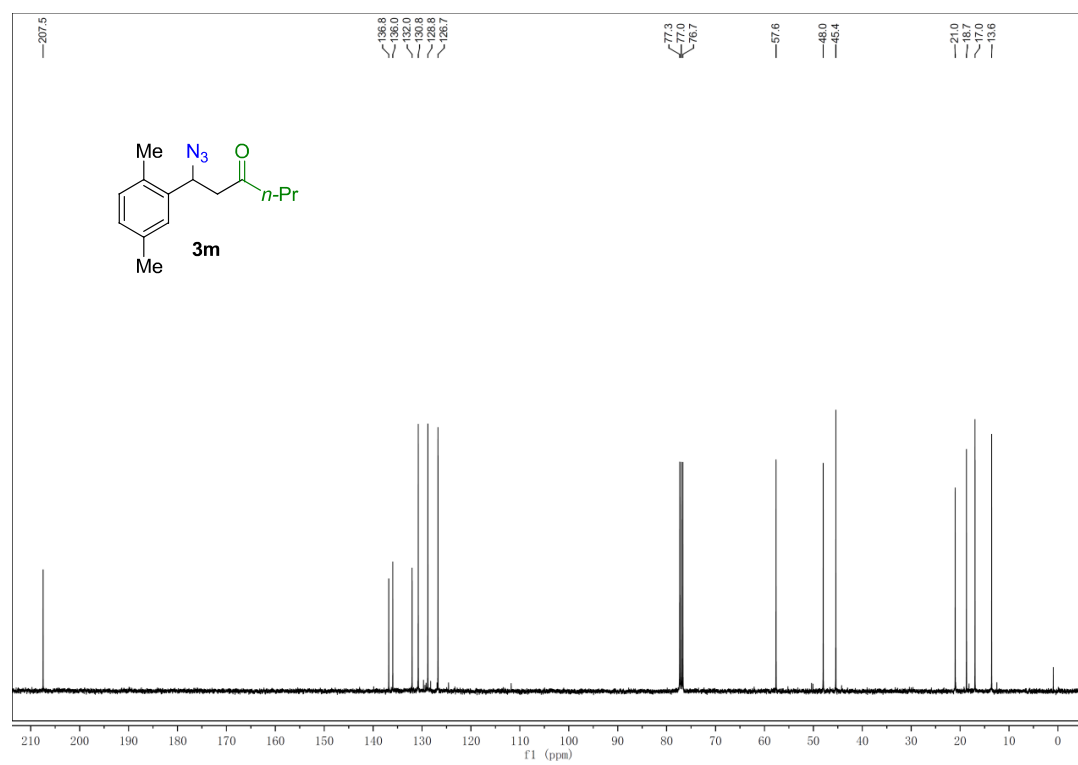



$^1\text{H}$  NMR spectrum of compound **3n** ( $\text{CDCl}_3$ , 400MHz)

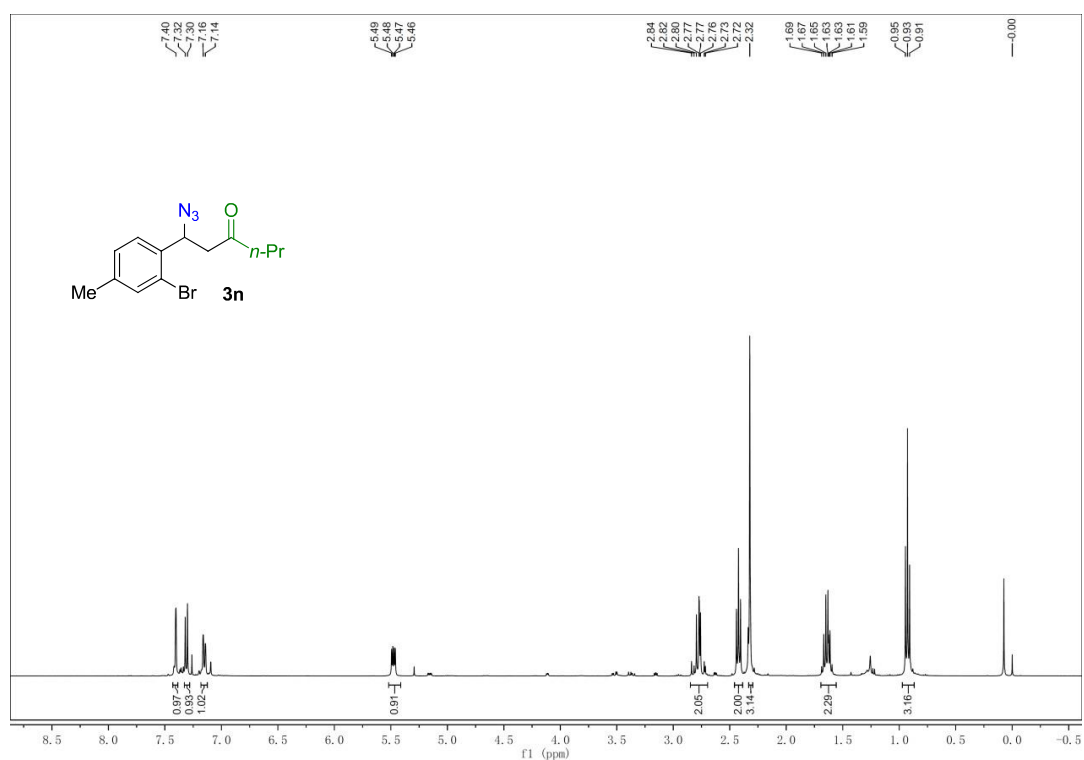

$^{13}\text{C}$  NMR spectrum of compound **3n** ( $\text{CDCl}_3$ , 100MHz)

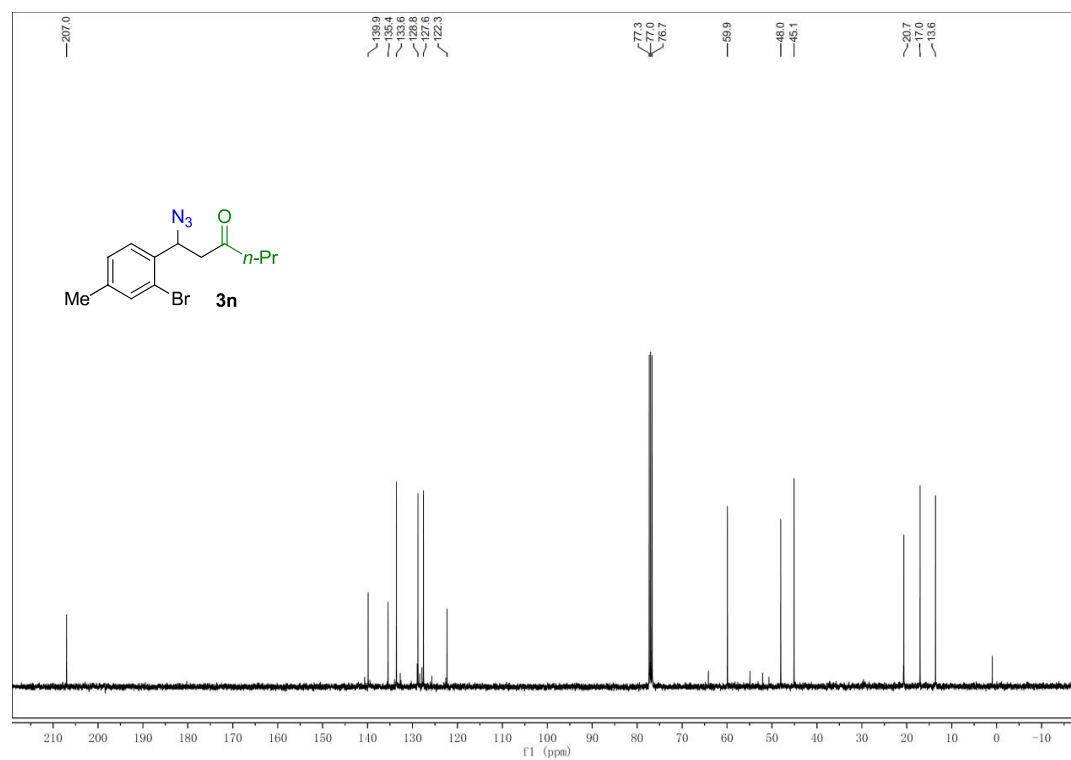

$^1\text{H}$  NMR spectrum of compound **3o** ( $\text{CDCl}_3$ , 400MHz)

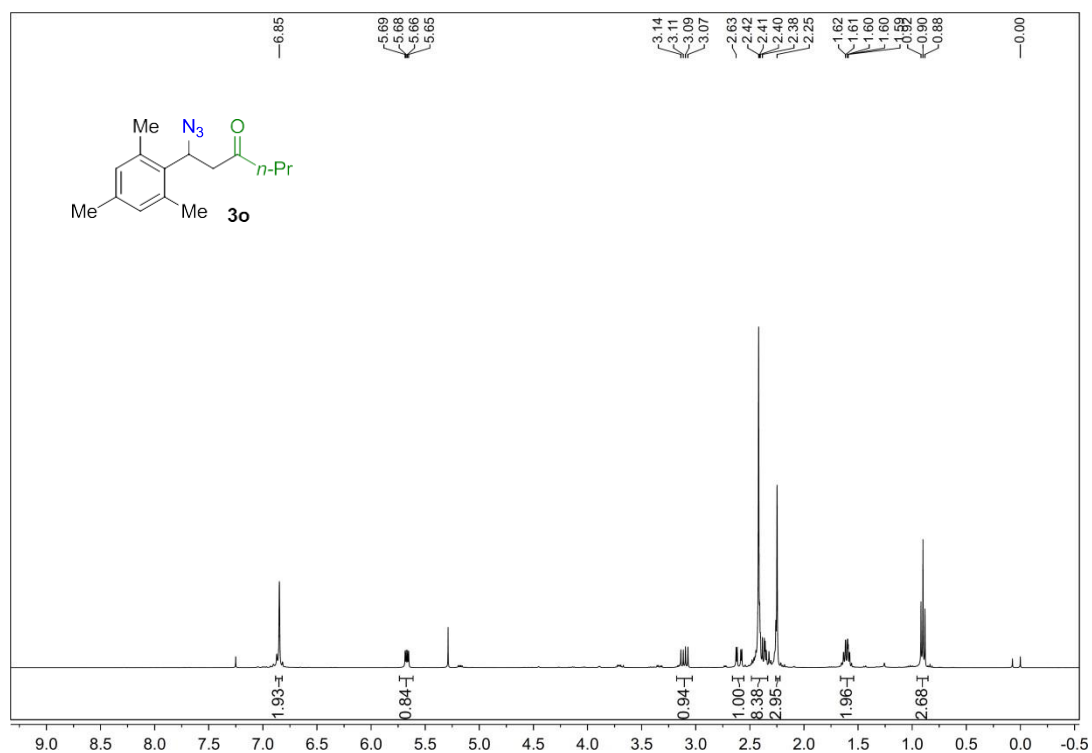

$^{13}\text{C}$  NMR spectrum of compound **3o** ( $\text{CDCl}_3$ , 100MHz)

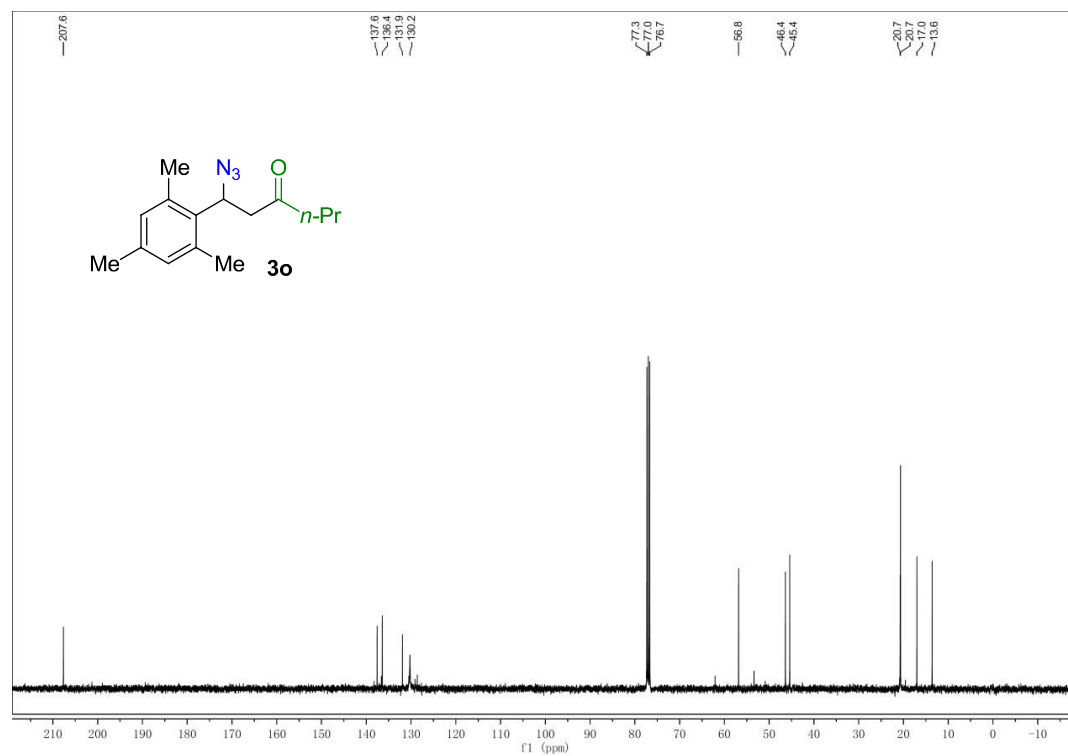

$^1\text{H}$  NMR spectrum of compound **3p** ( $\text{CDCl}_3$ , 400MHz)

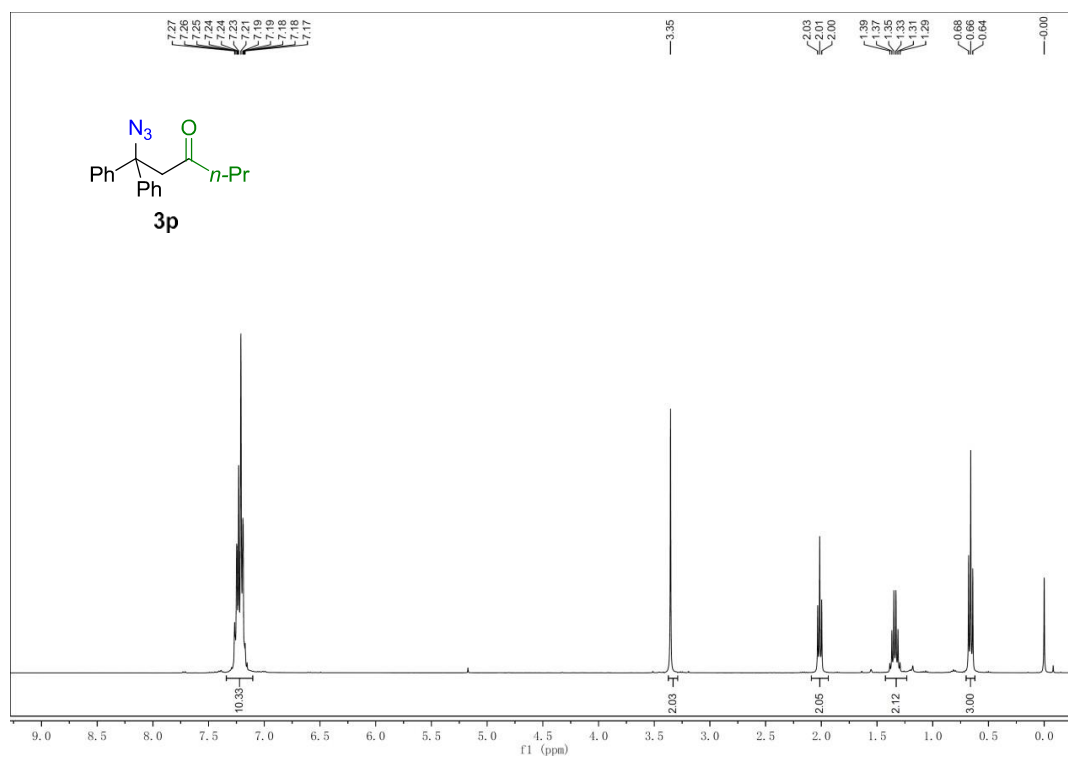

$^{13}\text{C}$  NMR spectrum of compound **3p** ( $\text{CDCl}_3$ , 100MHz)

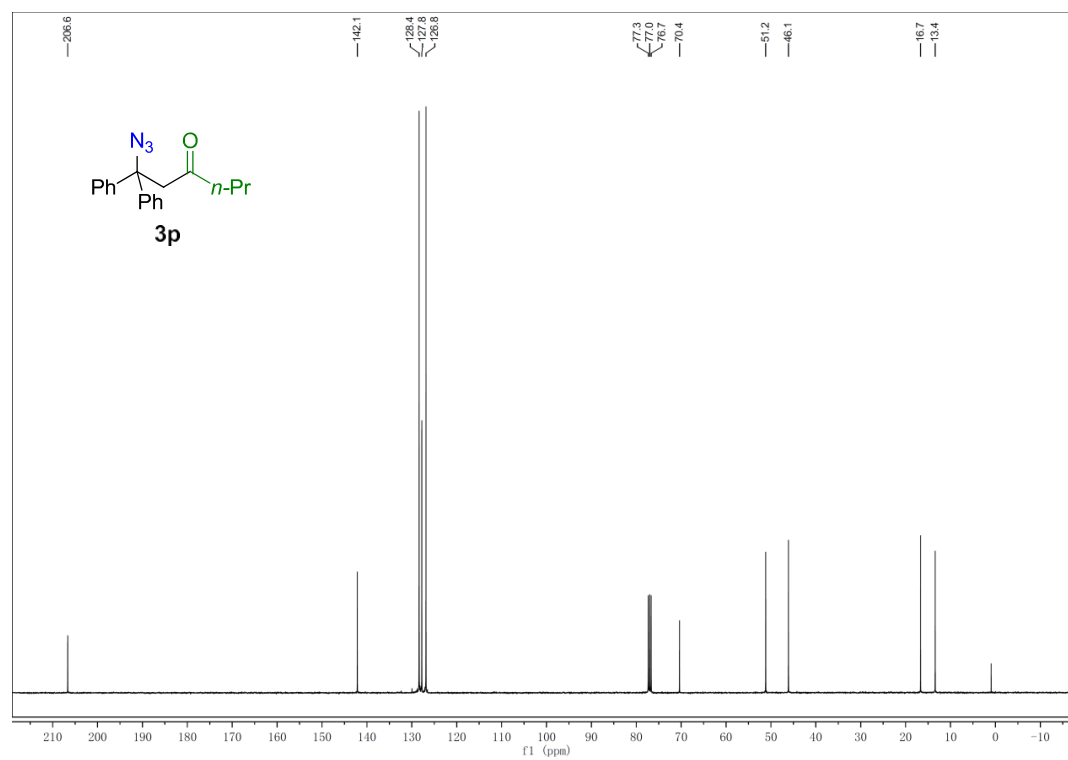

$^1\text{H}$  NMR spectrum of compound **3q** ( $\text{CDCl}_3$ , 400MHz)

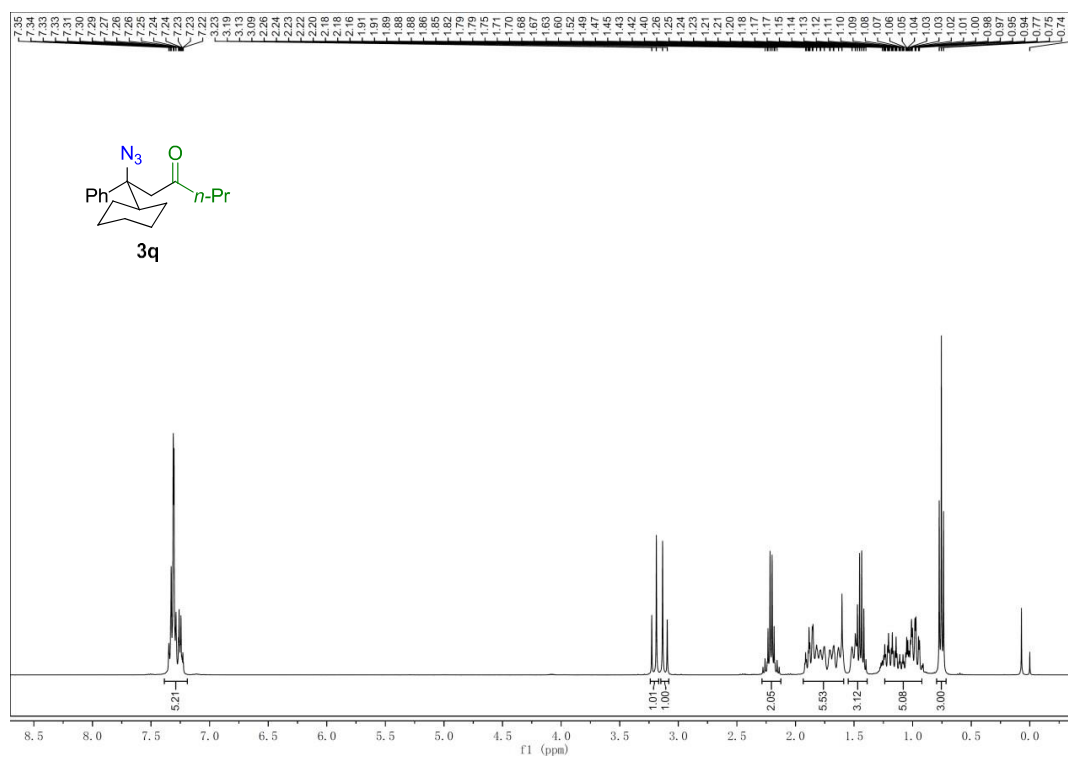

$^{13}\text{C}$  NMR spectrum of compound **3q** ( $\text{CDCl}_3$ , 100MHz)

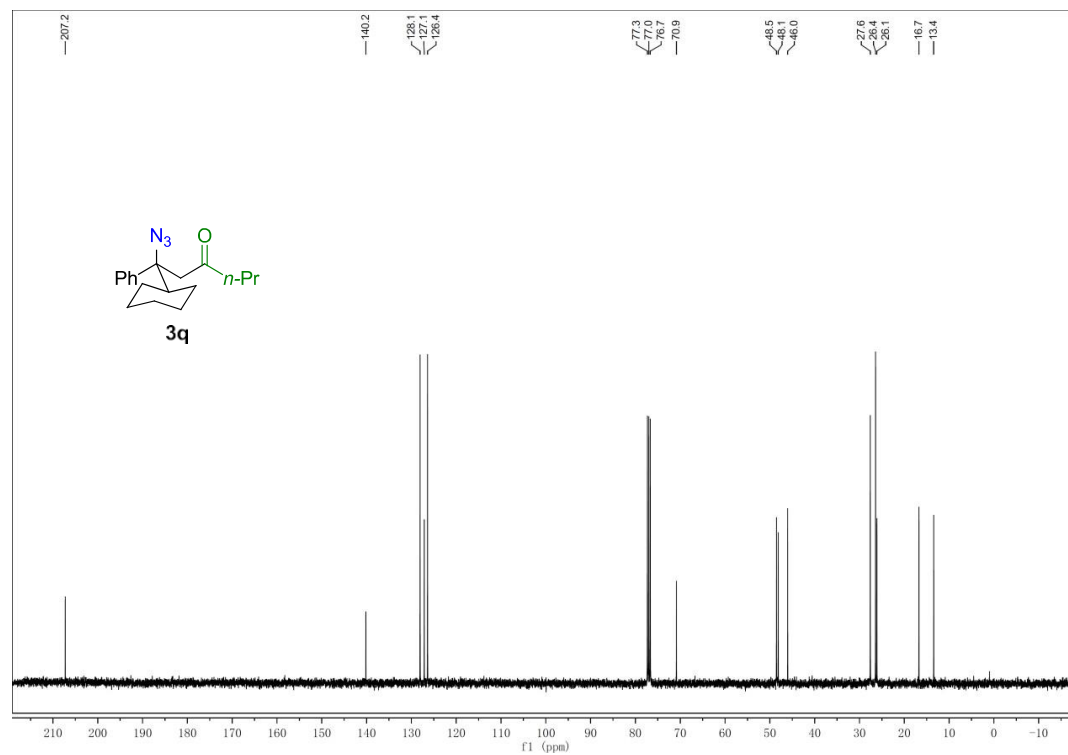

$^1\text{H}$  NMR spectrum of compound **3r** ( $\text{CDCl}_3$ , 400MHz)

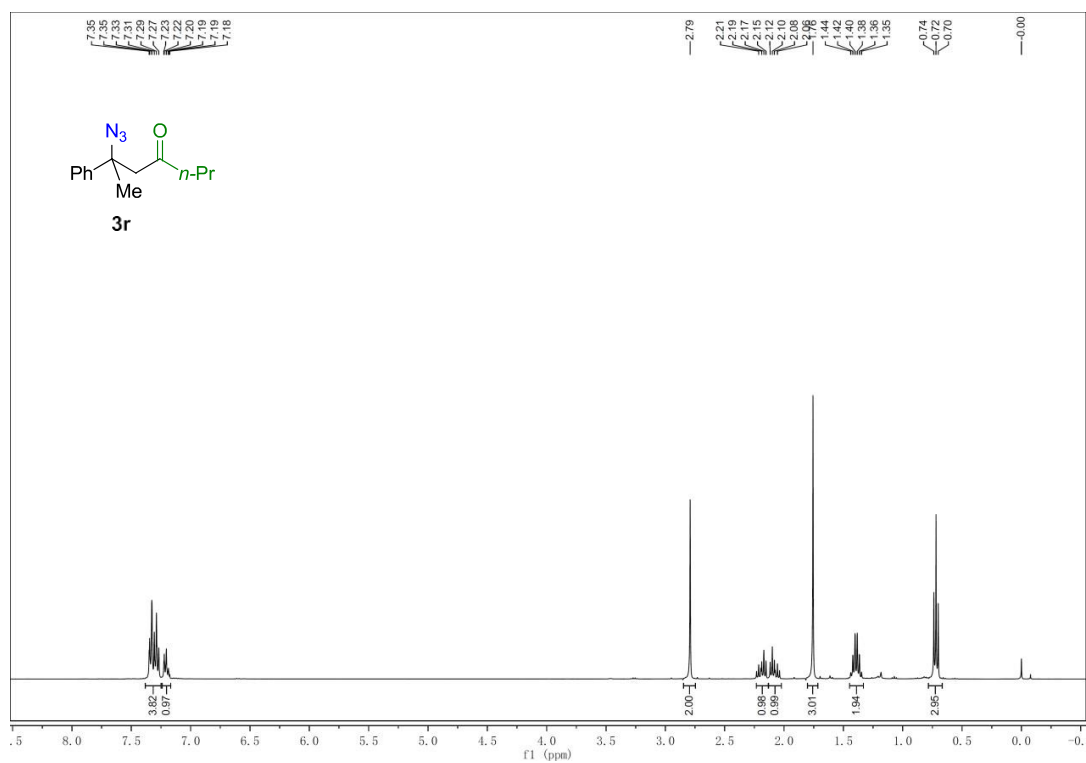

$^{13}\text{C}$  NMR spectrum of compound **3r** ( $\text{CDCl}_3$ , 100MHz)

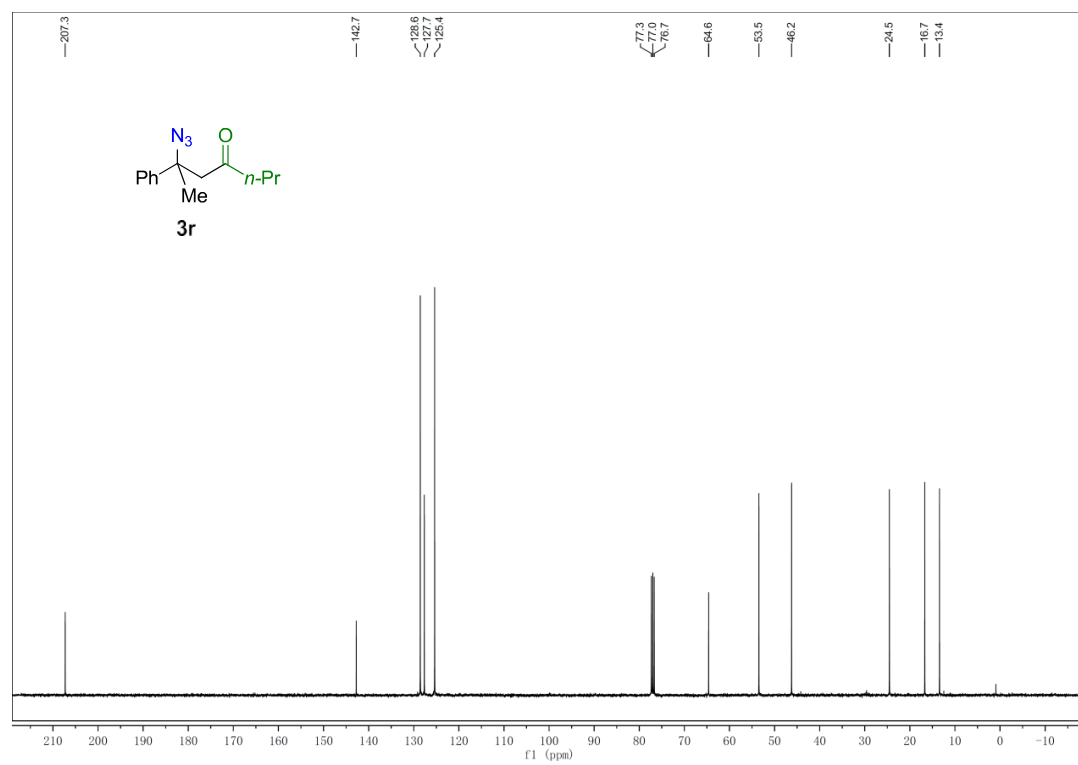

$^1\text{H}$  NMR spectrum of compound **3s** ( $\text{CDCl}_3$ , 400MHz)

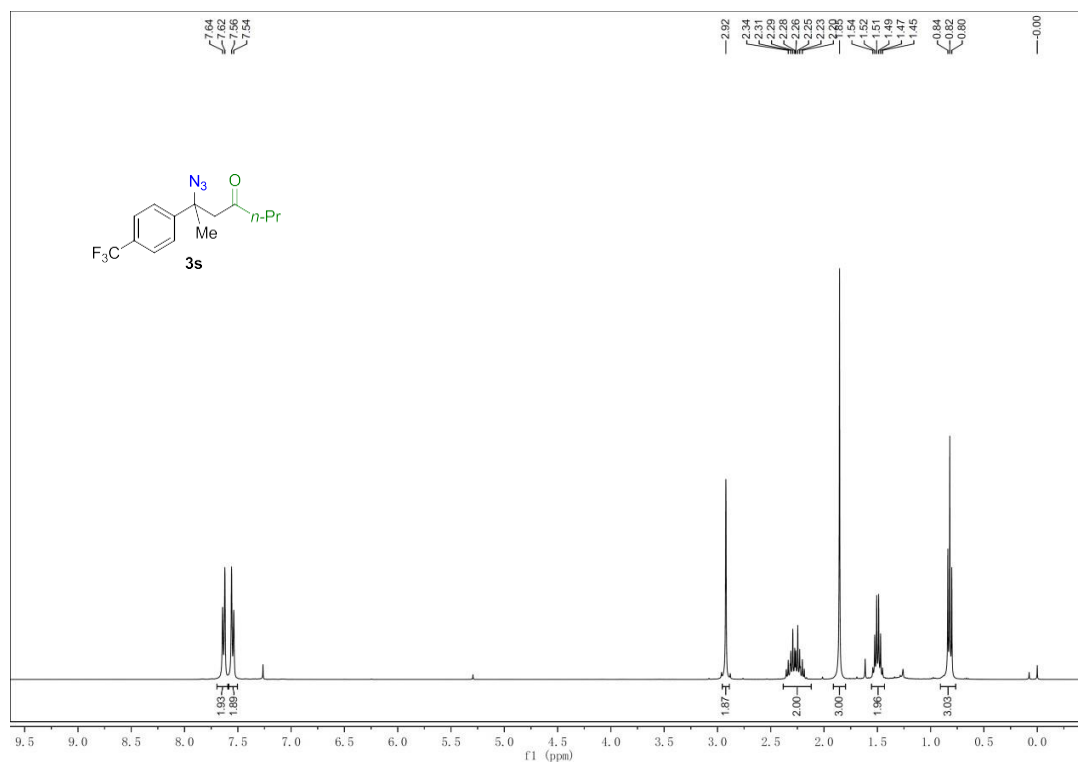

$^{13}\text{C}$  NMR spectrum of compound **3s** ( $\text{CDCl}_3$ , 100MHz)

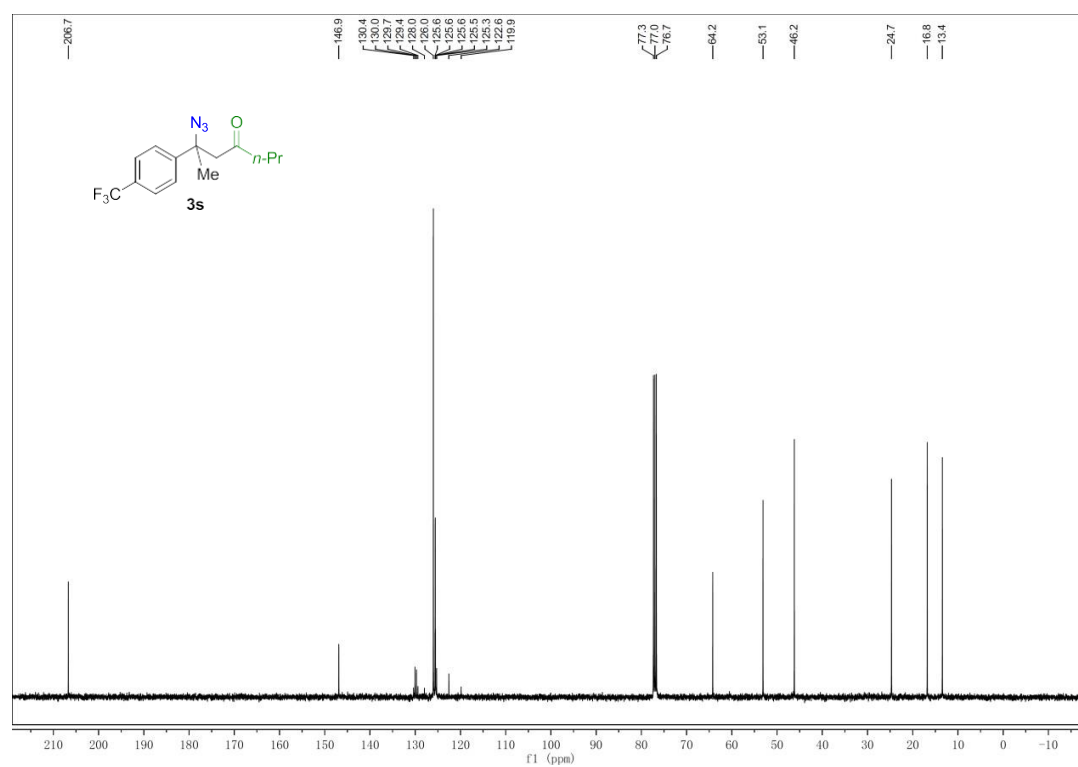

<sup>1</sup>H NMR spectrum of compound **3t** (CDCl<sub>3</sub>, 400MHz)

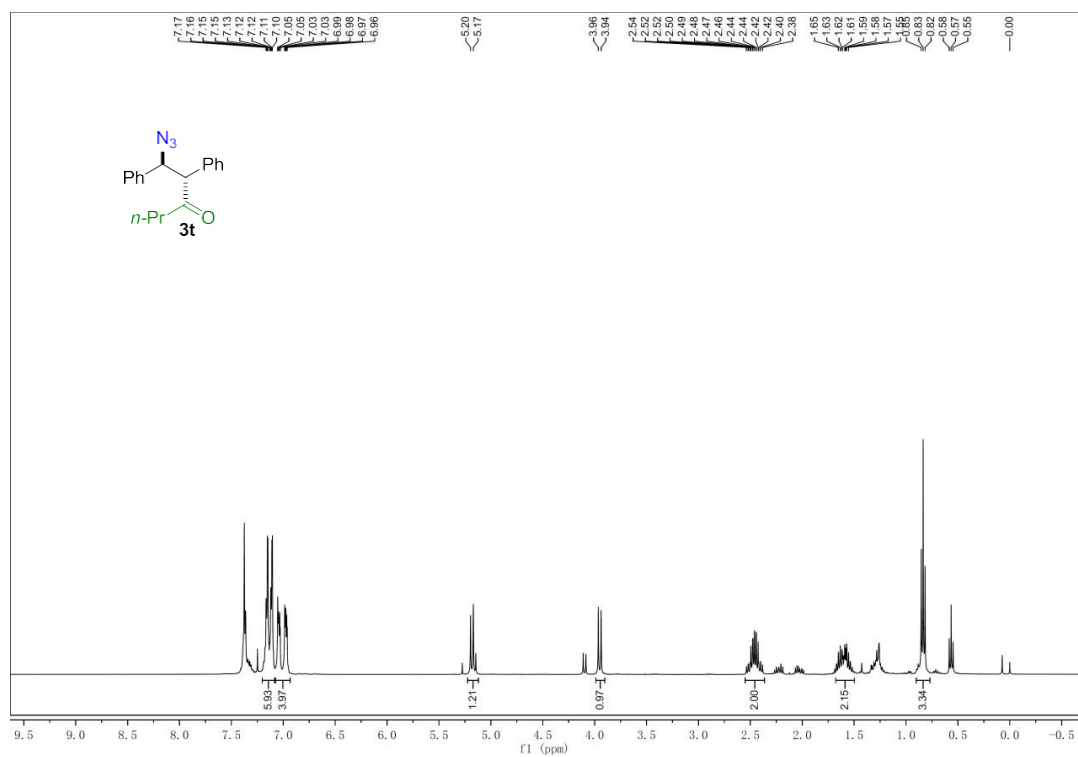

<sup>13</sup>C NMR spectrum of compound **3t** (CDCl<sub>3</sub>, 100MHz)

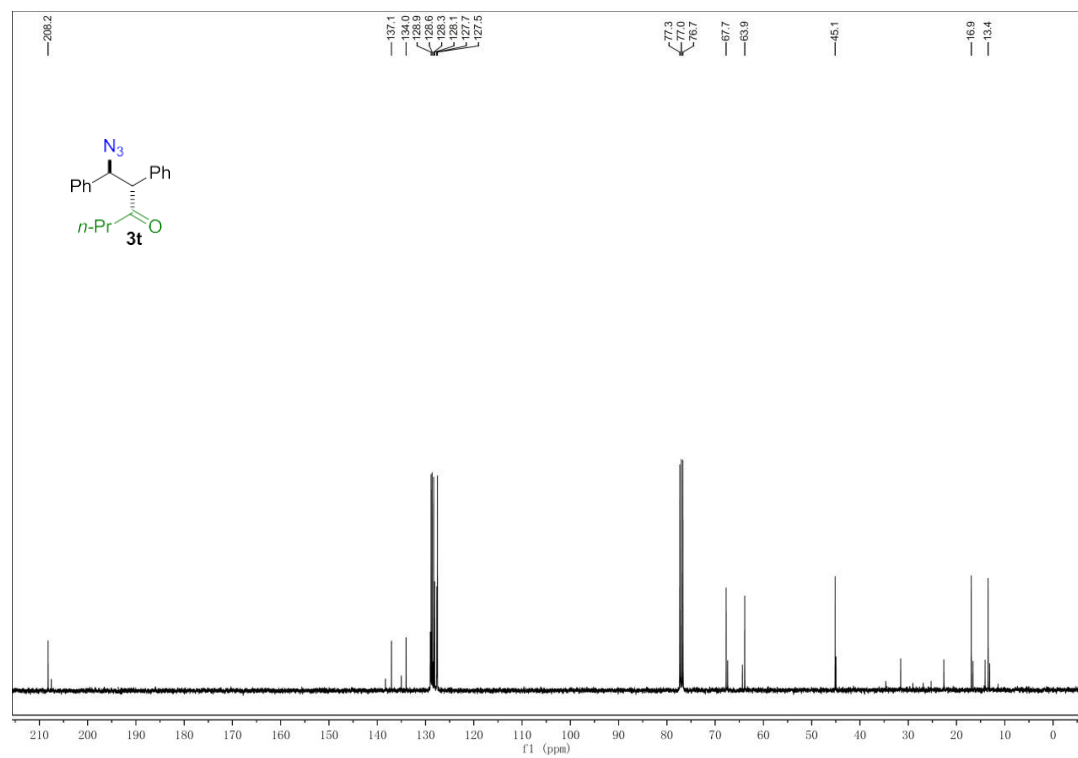

<sup>1</sup>H NMR spectrum of compound **3u** (CDCl<sub>3</sub>, 400MHz)

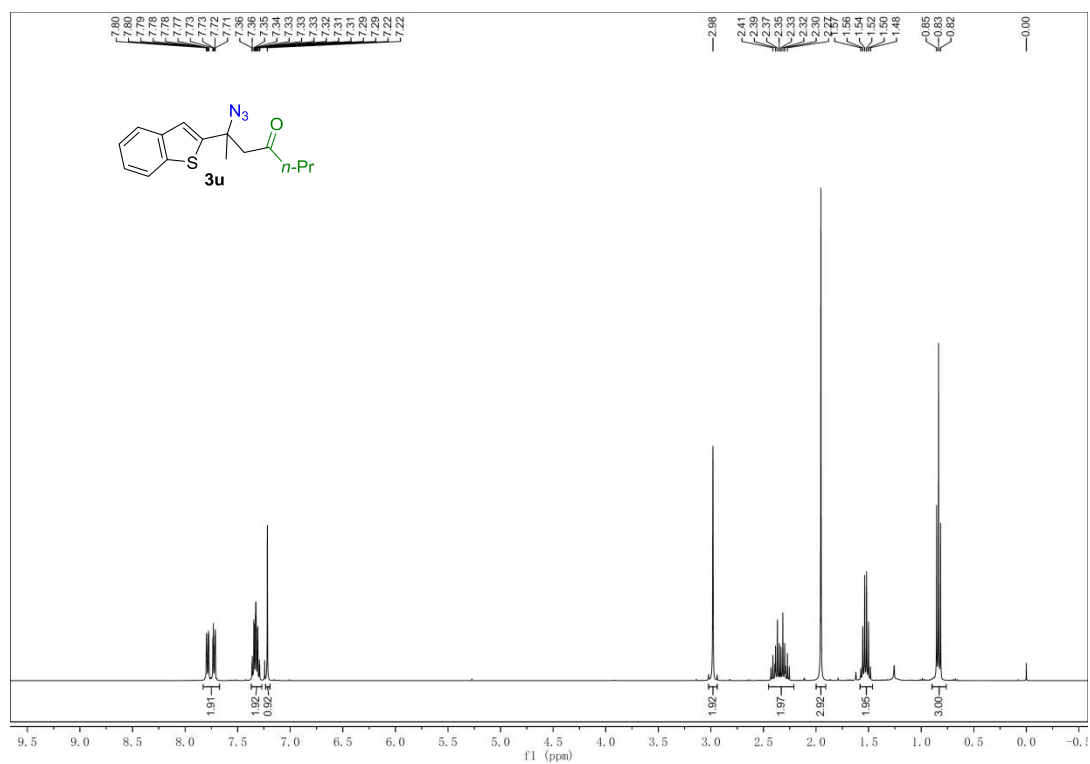

<sup>13</sup>C NMR spectrum of compound **3u**(CDCl<sub>3</sub>, 100MHz)

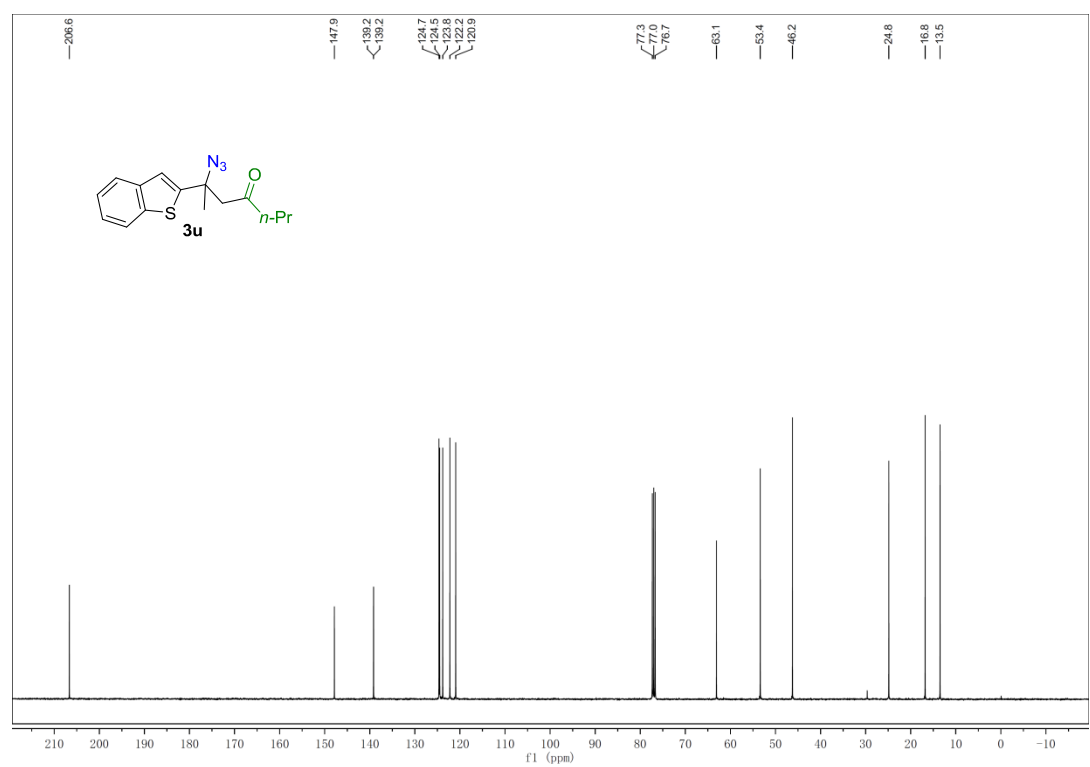



$^1\text{H}$  NMR spectrum of compound **3v** ( $\text{CDCl}_3$ , 400MHz)

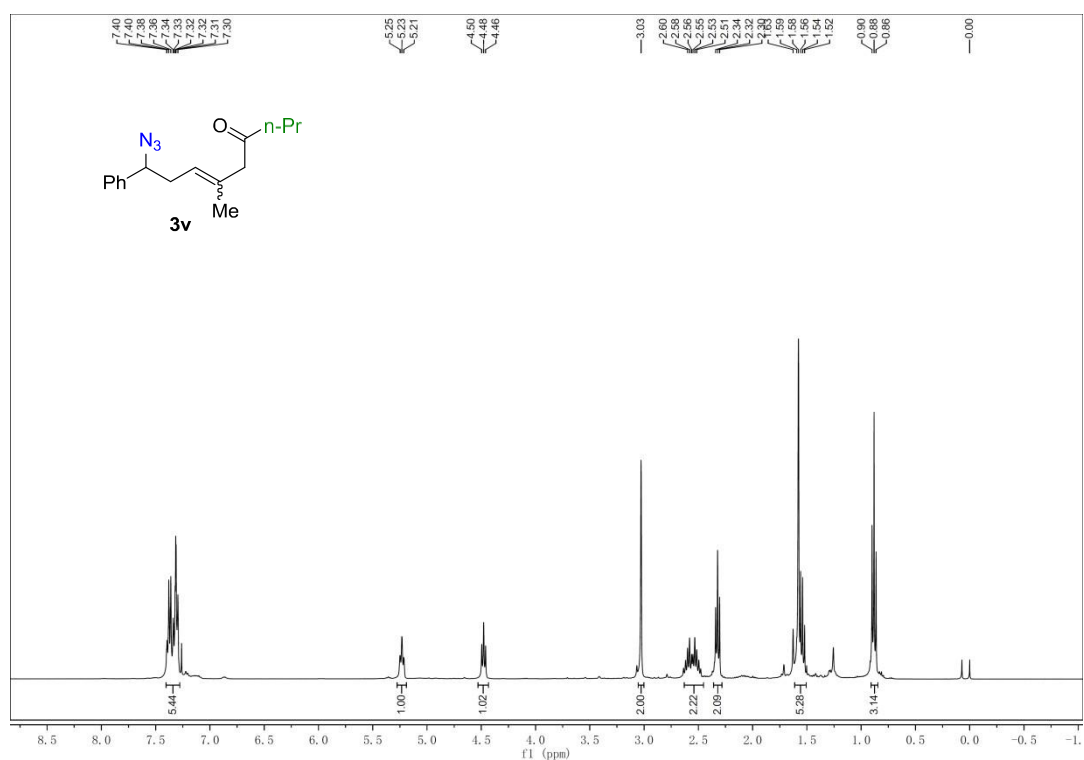

$^{13}\text{C}$  NMR spectrum of compound **3v** ( $\text{CDCl}_3$ , 100MHz)

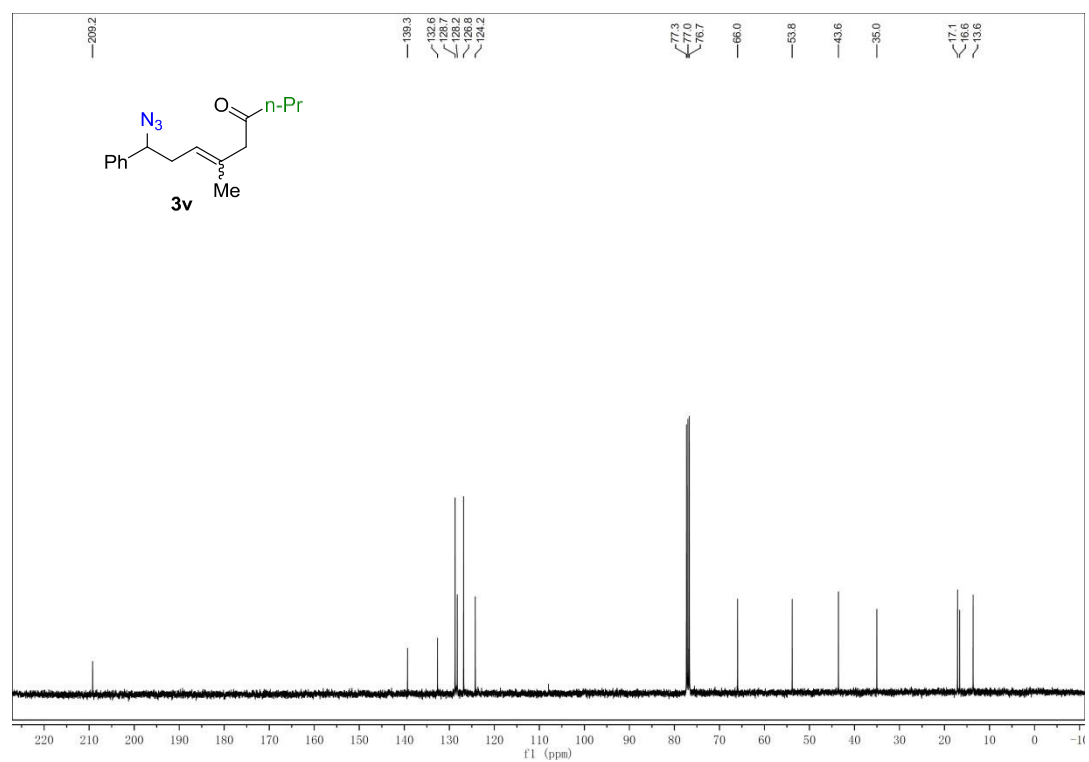

$^1\text{H}$  NMR spectrum of compound **3w** ( $\text{CDCl}_3$ , 400MHz)

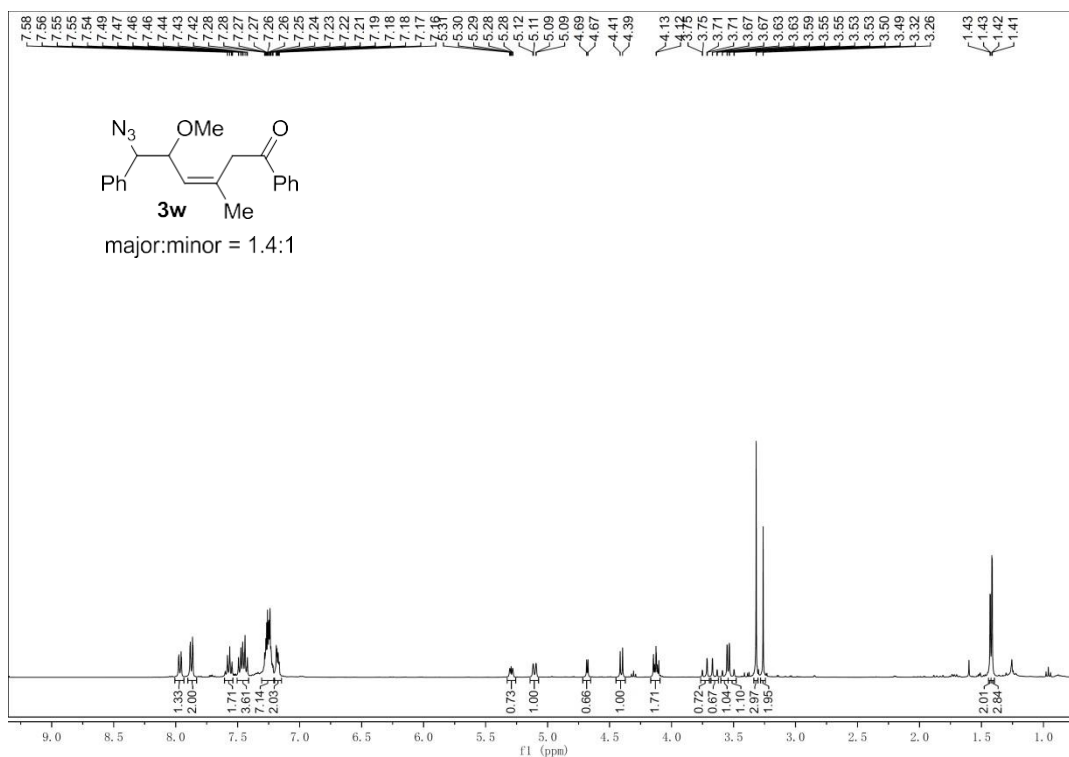

$^{13}\text{C}$  NMR spectrum of compound **3w** ( $\text{CDCl}_3$ , 100MHz)

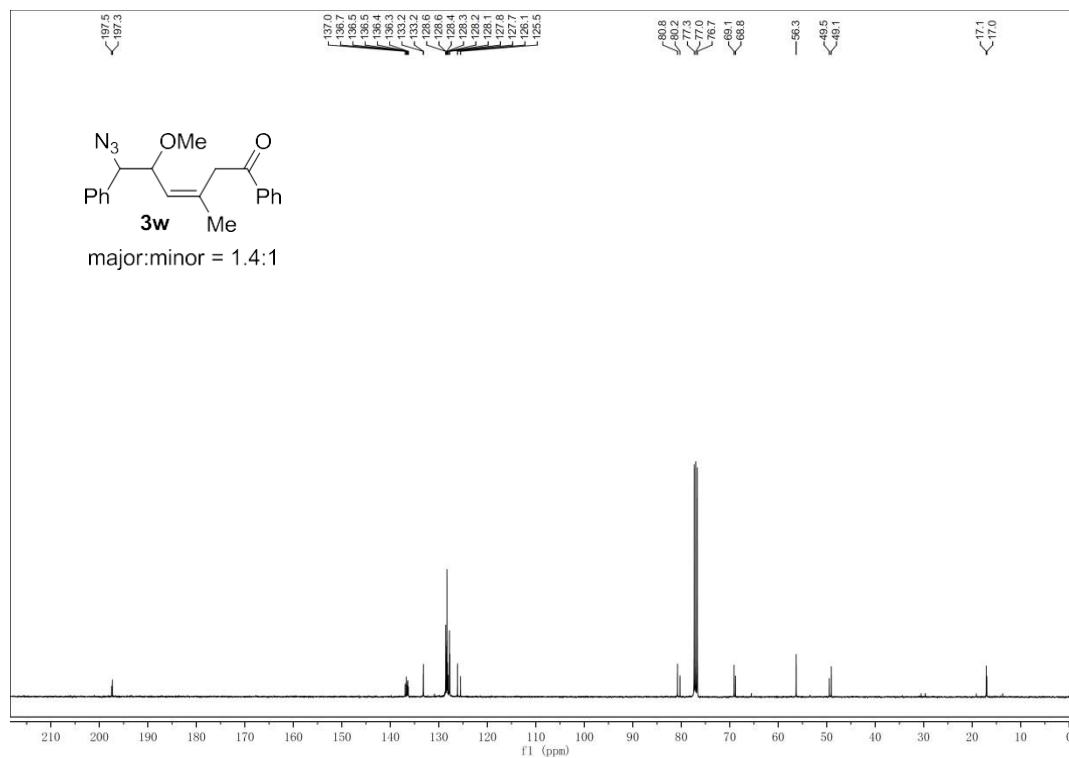

HMBC spectrum of compound **3w**

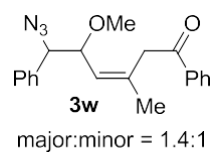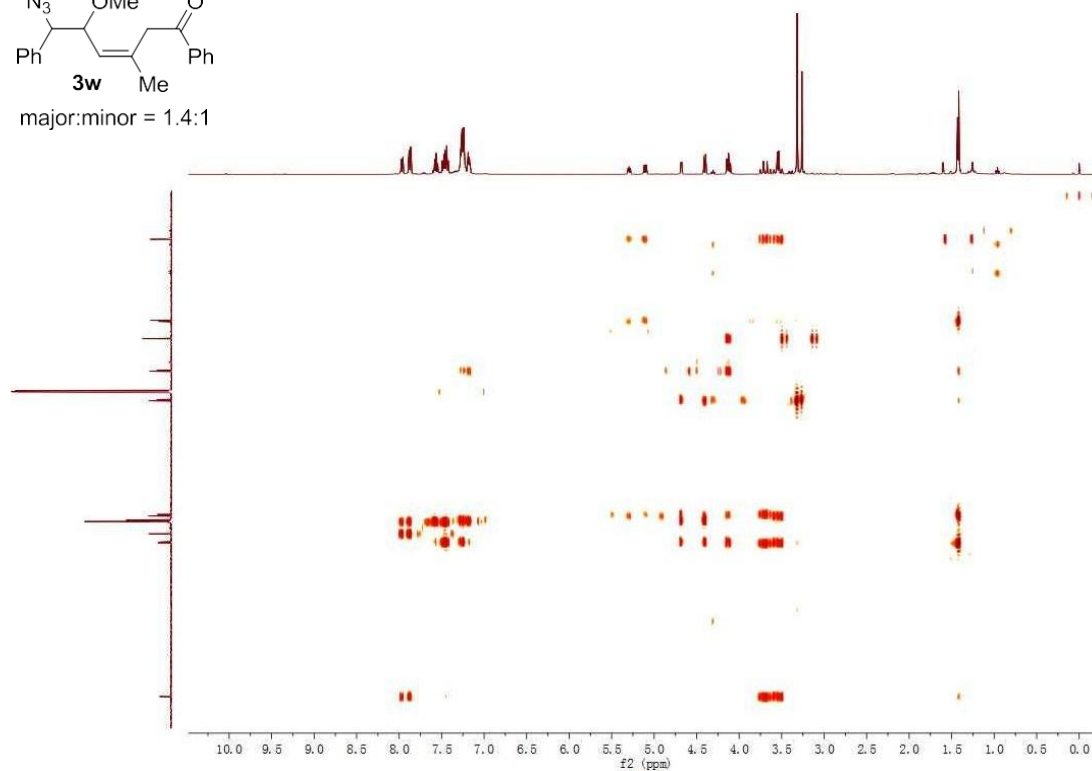

HMQC spectrum of compound **3w**

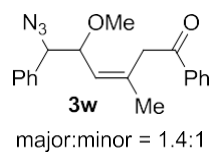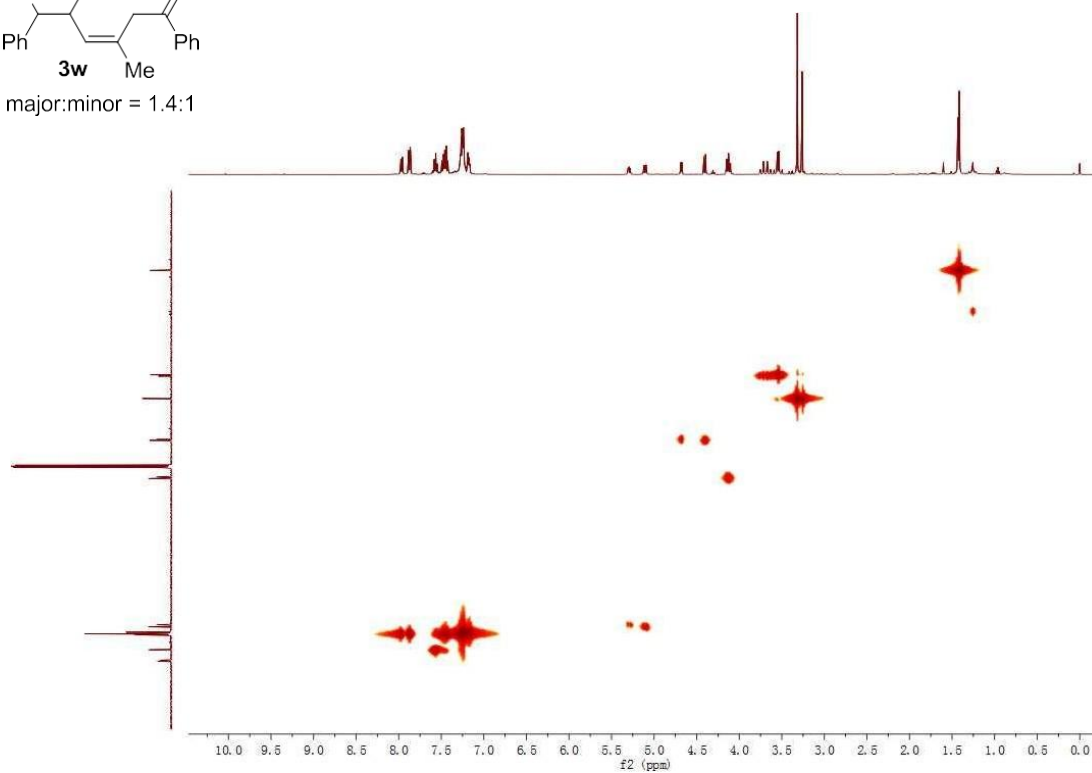

$^1\text{H}$  NMR spectrum of compound **3aa** ( $\text{CDCl}_3$ , 400MHz)

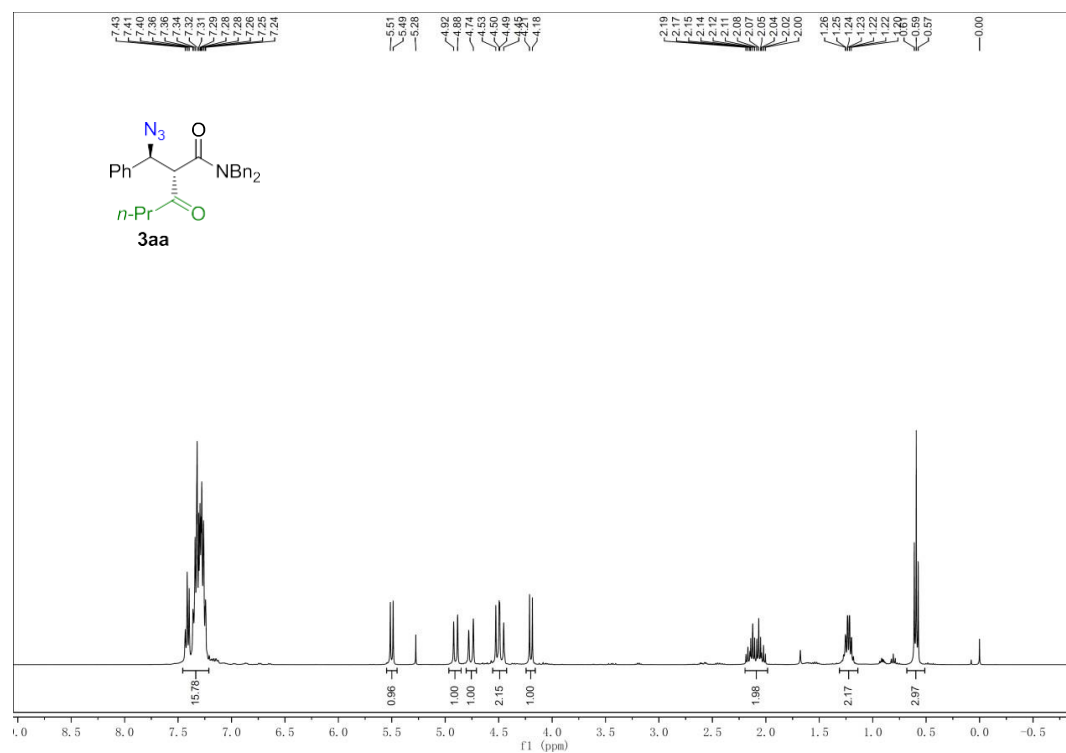

$^{13}\text{C}$  NMR spectrum of compound **3aa** ( $\text{CDCl}_3$ , 100MHz)

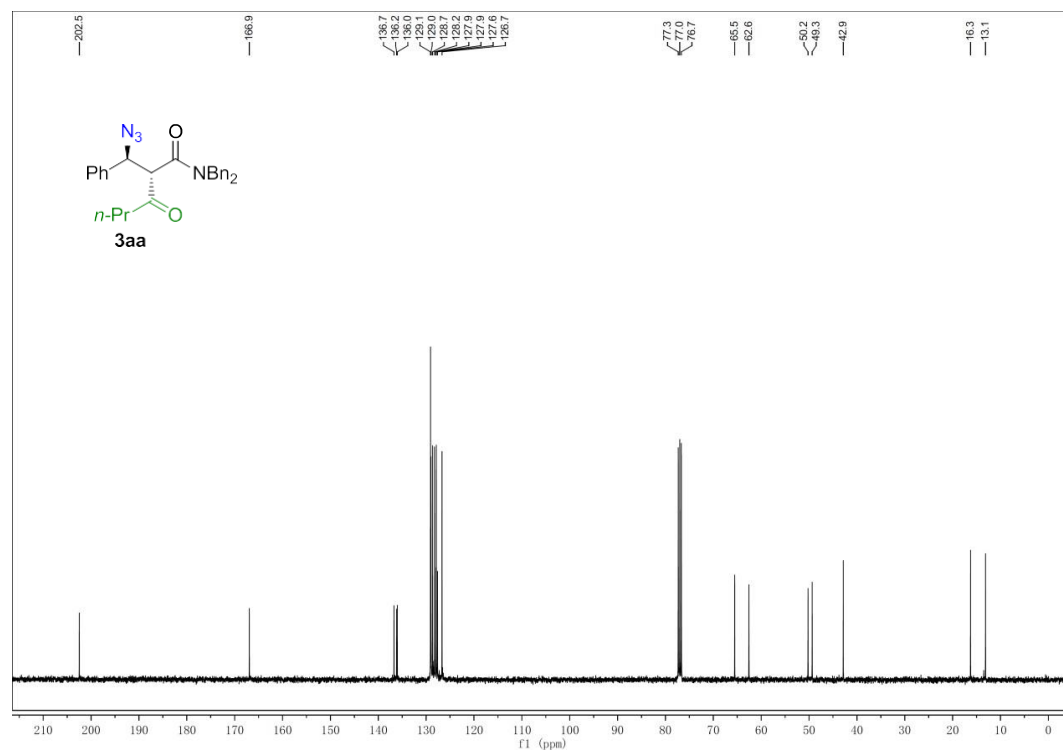

$^1\text{H}$  NMR spectrum of compound **3ab** ( $\text{CDCl}_3$ , 400MHz)

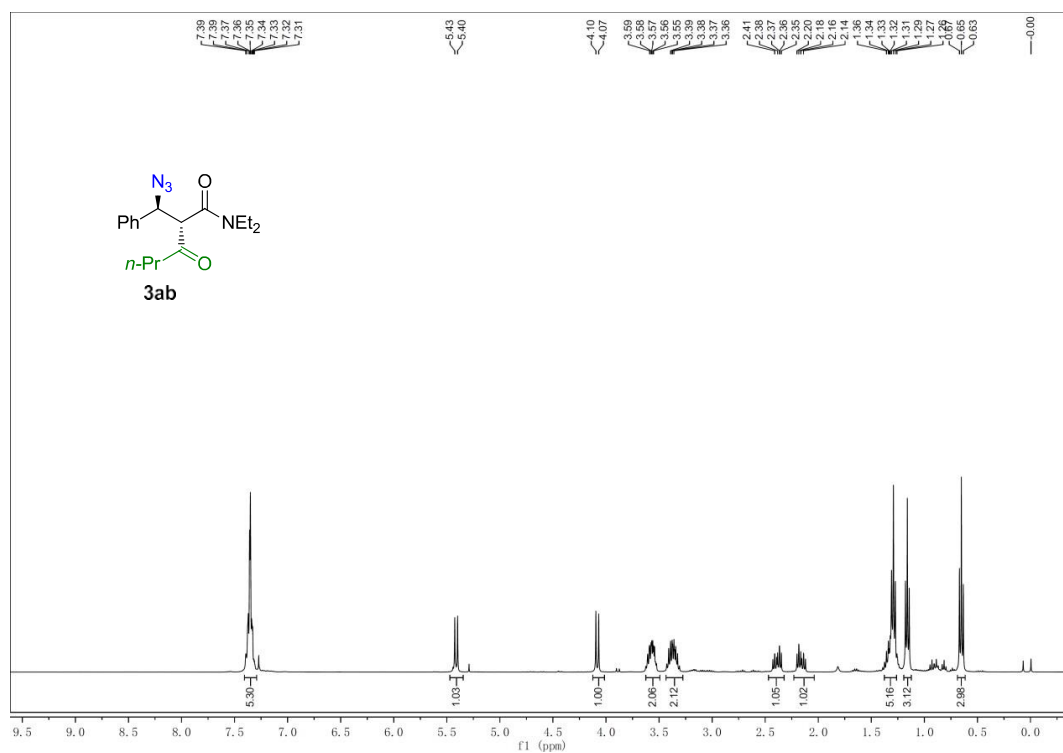

$^{13}\text{C}$  NMR spectrum of compound **3ab** ( $\text{CDCl}_3$ , 100MHz)

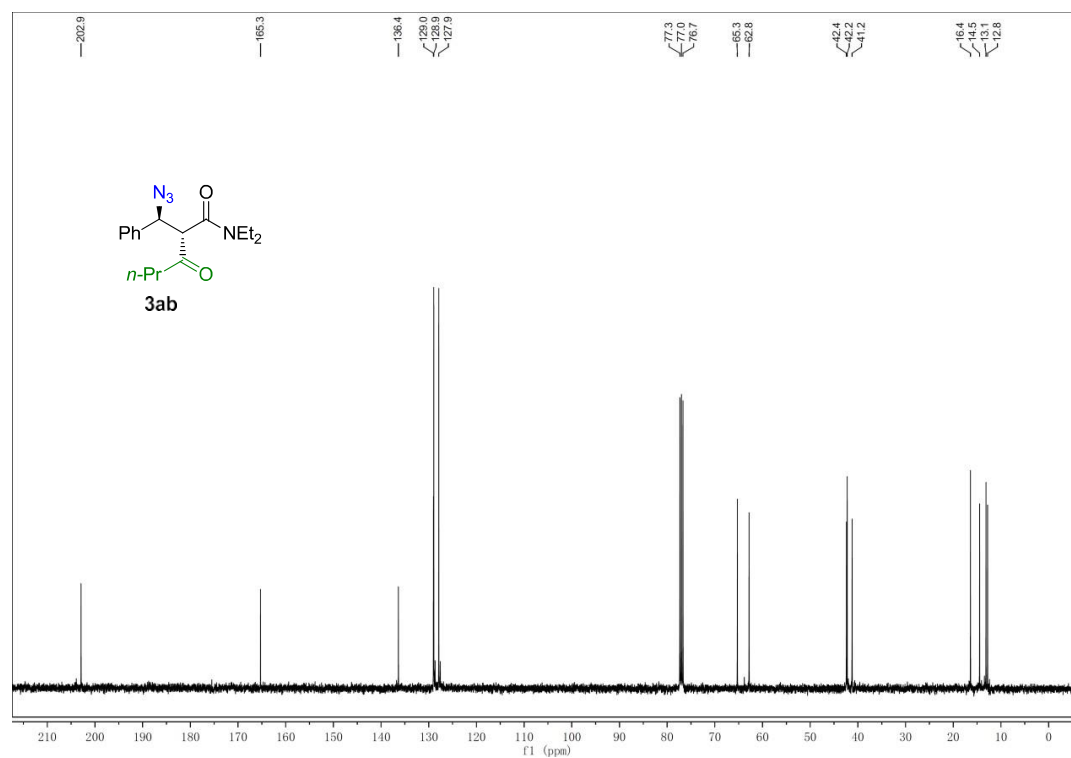

$^1\text{H}$  NMR spectrum of compound **3ac** ( $\text{CDCl}_3$ , 400MHz)

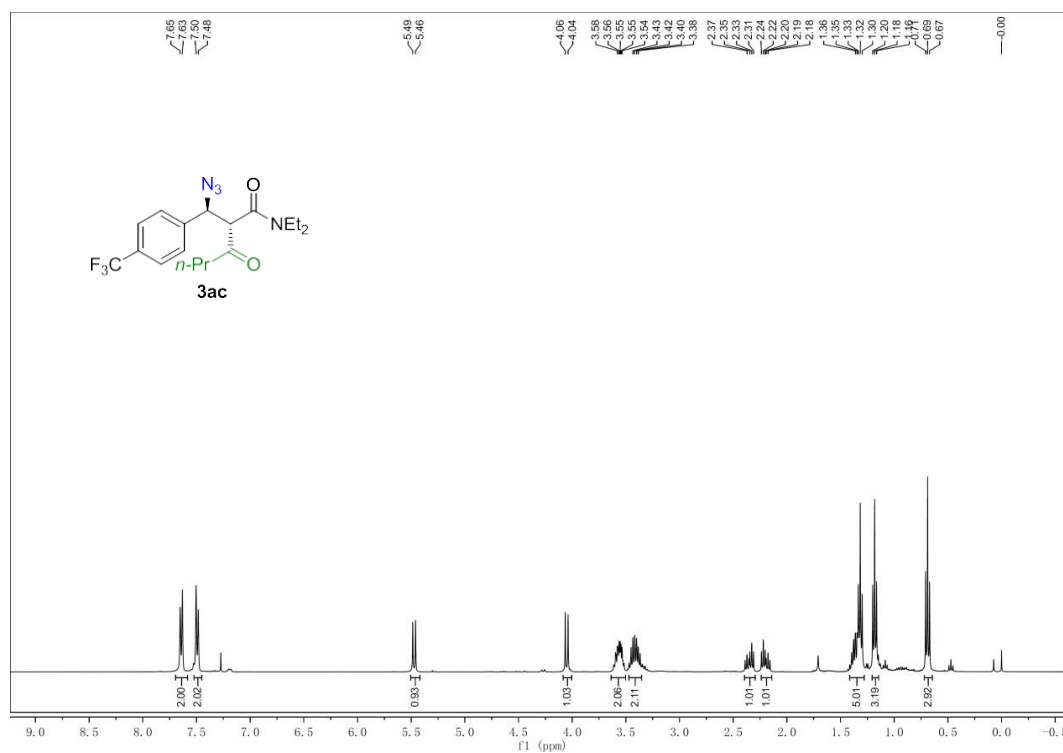

$^{13}\text{C}$  NMR spectrum of compound **3ac** ( $\text{CDCl}_3$ , 100MHz)

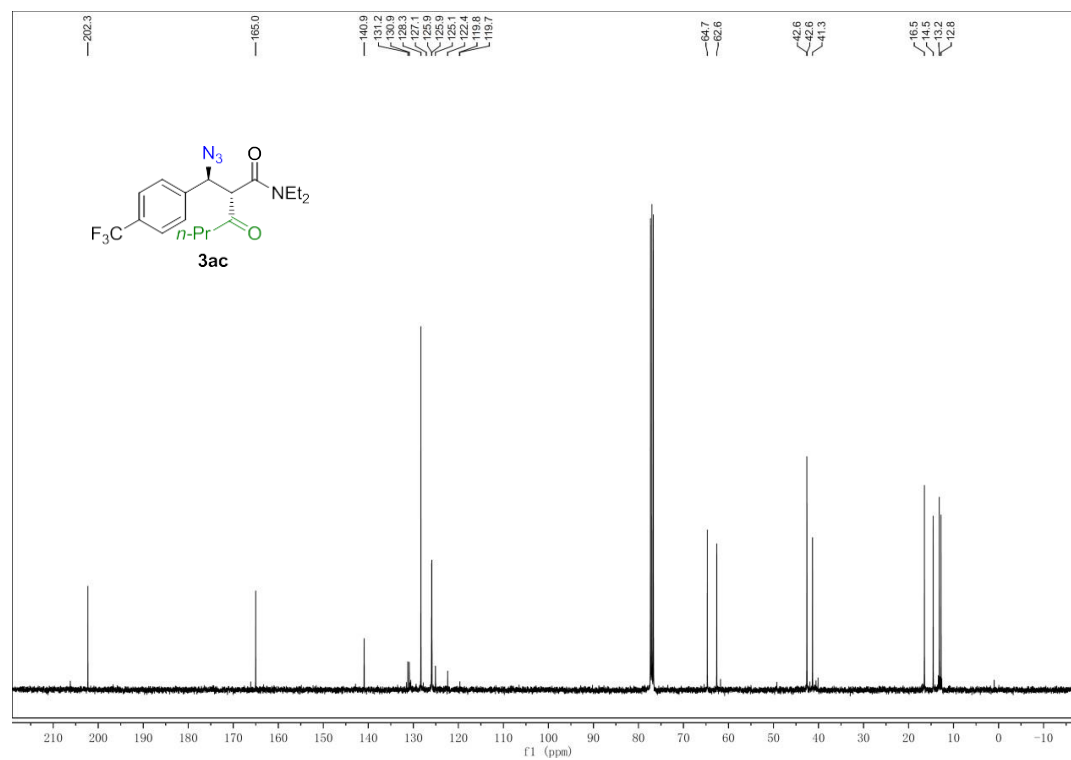

$^1\text{H}$  NMR spectrum of compound **3ad** ( $\text{CDCl}_3$ , 400MHz)

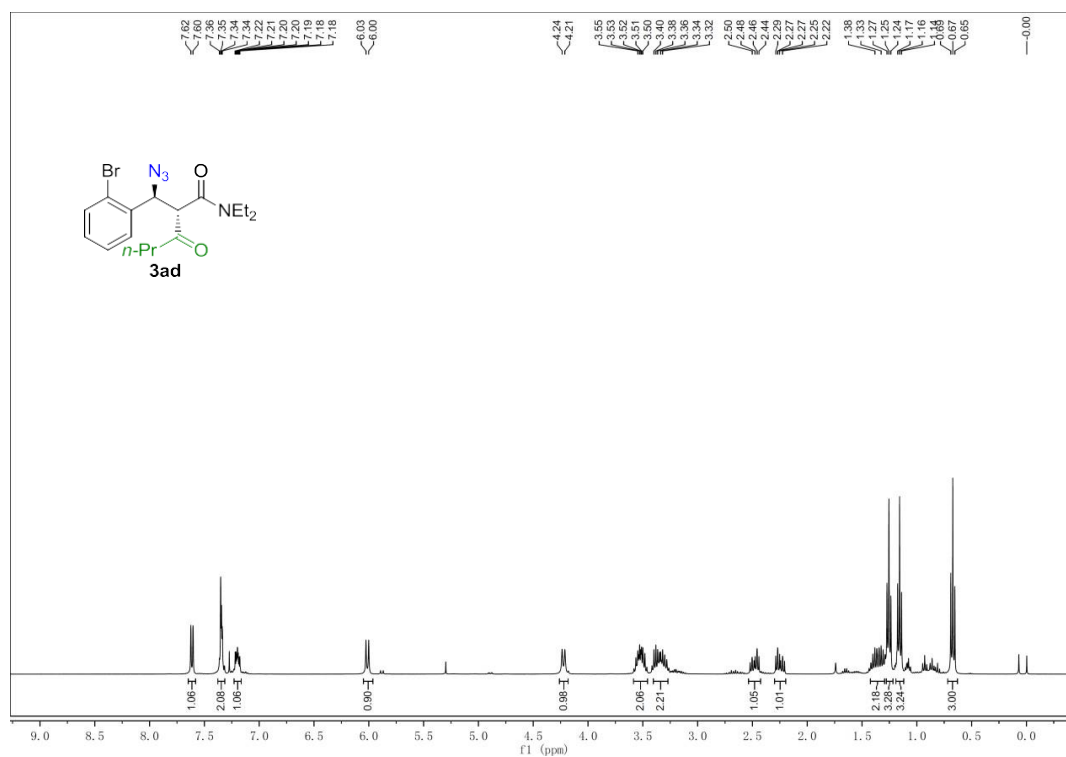

$^{13}\text{C}$  NMR spectrum of compound **3ad** ( $\text{CDCl}_3$ , 100MHz)

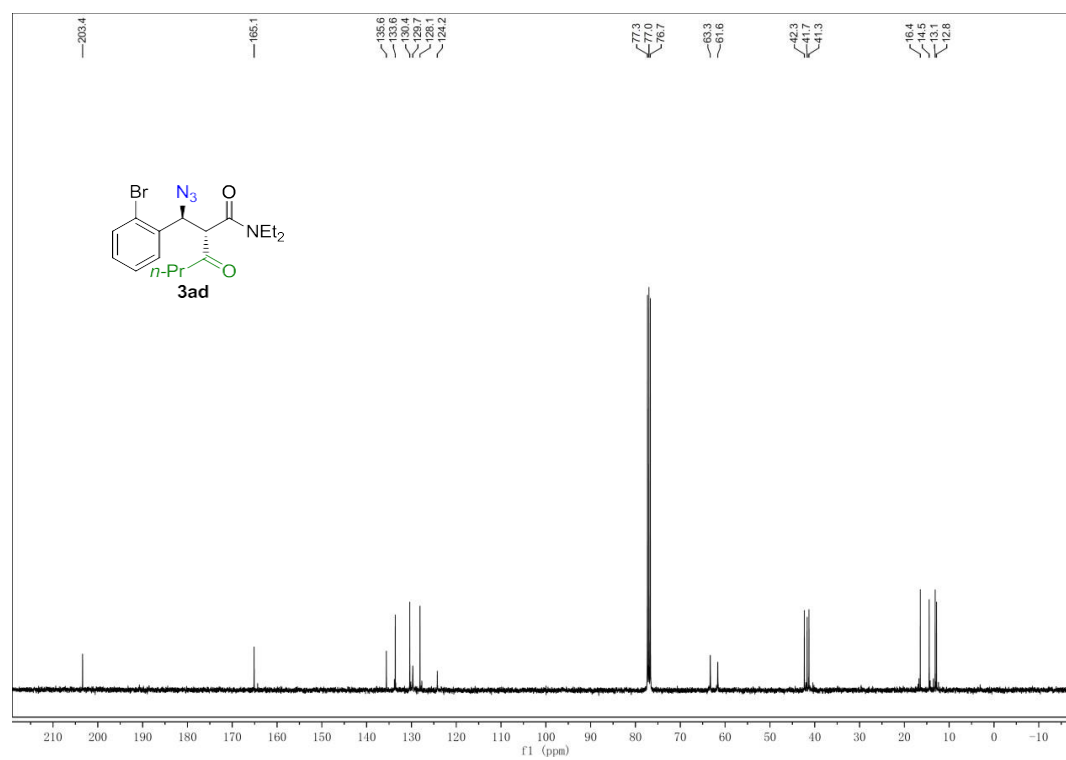

$^1\text{H}$  NMR spectrum of compound **3ae** ( $\text{CDCl}_3$ , 400MHz)

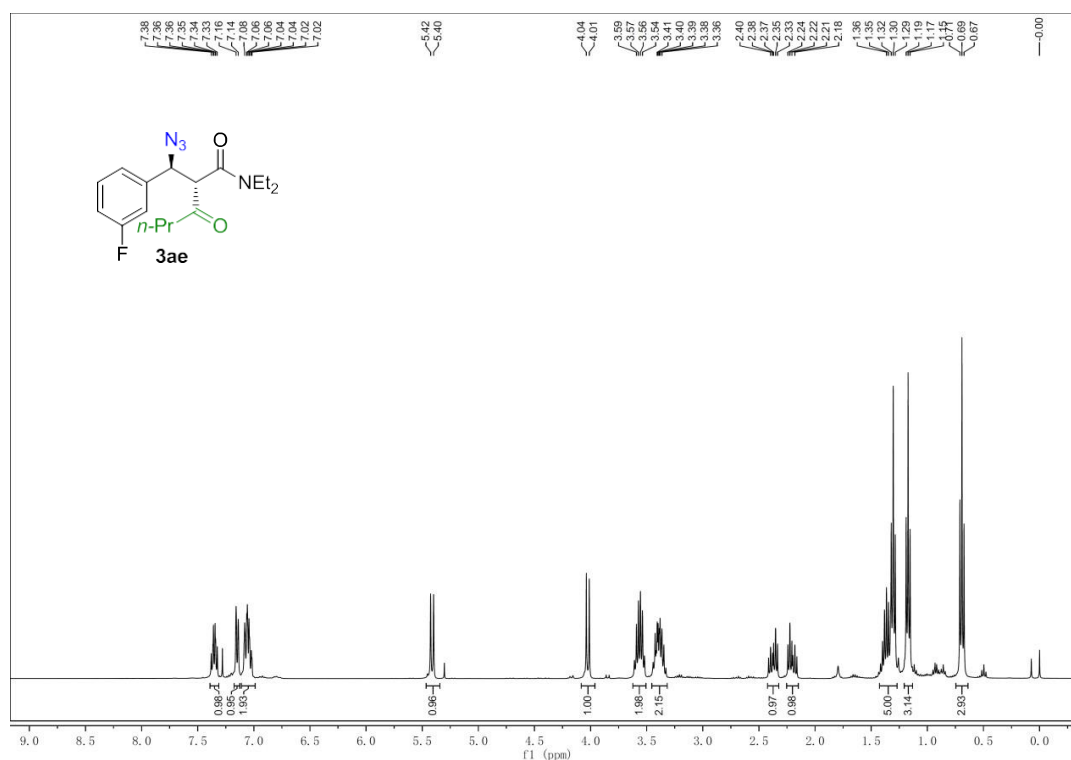

$^{13}\text{C}$  NMR spectrum of compound **3ae** ( $\text{CDCl}_3$ , 100MHz)

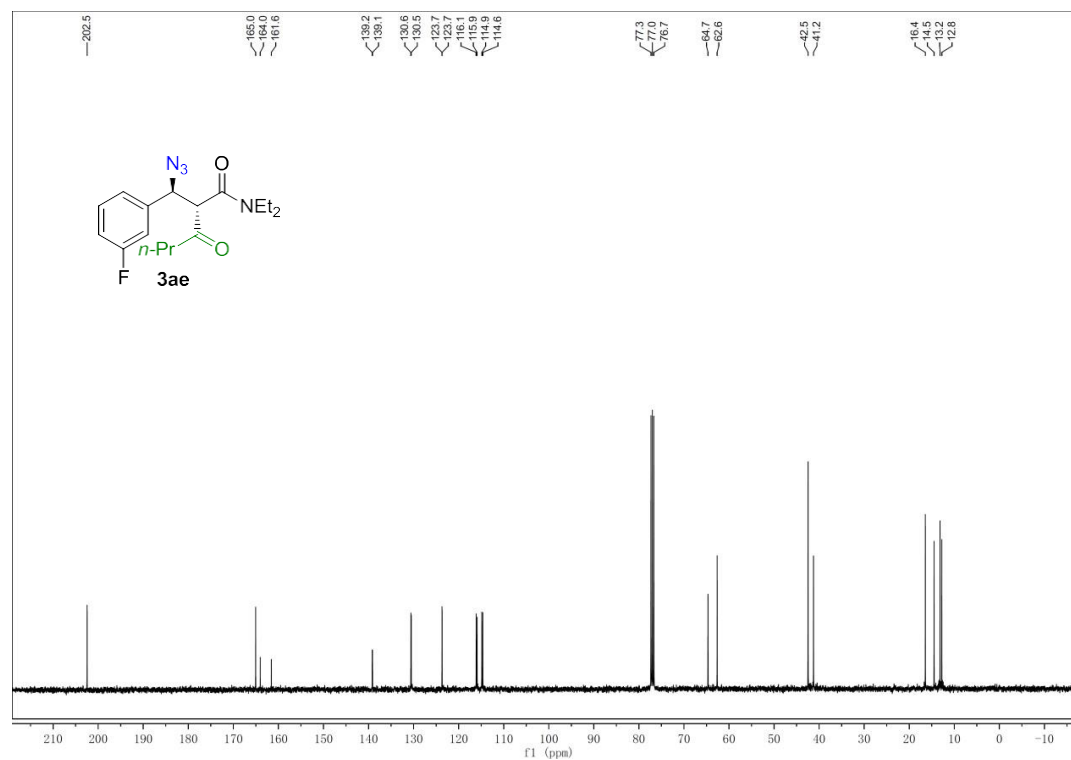



$^1\text{H}$  NMR spectrum of compound **3af** ( $\text{CDCl}_3$ , 400MHz)

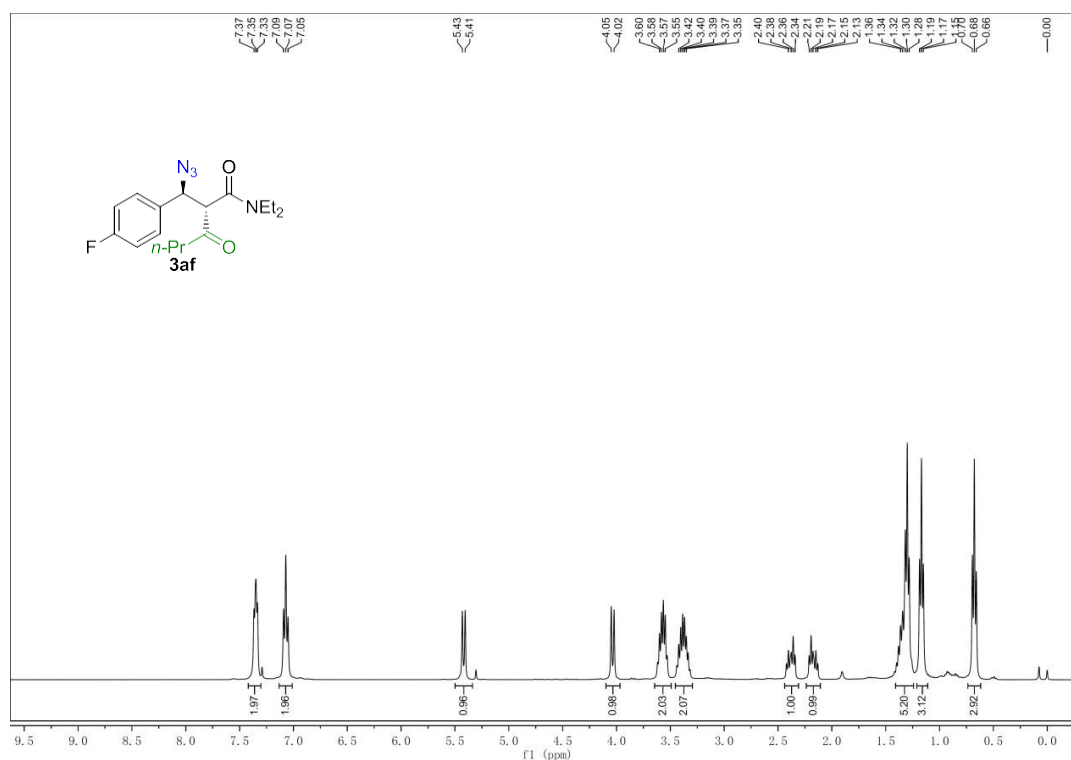

$^{13}\text{C}$  NMR spectrum of compound **3af** ( $\text{CDCl}_3$ , 100MHz)

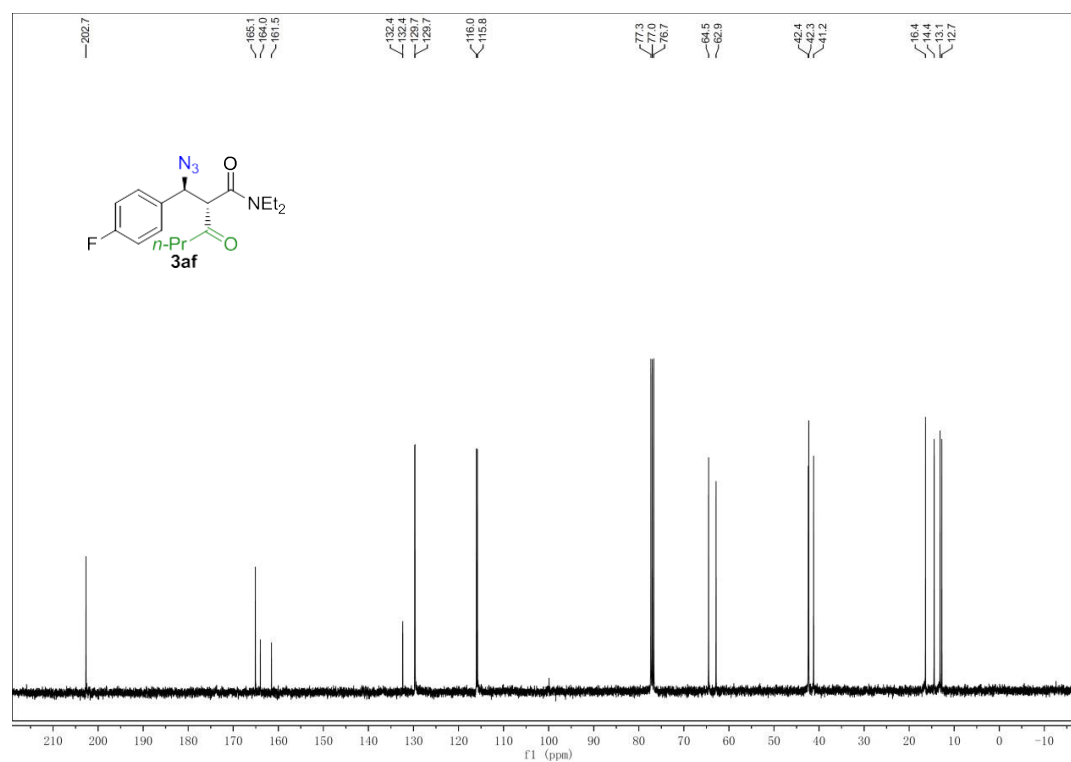

$^1\text{H}$  NMR spectrum of compound **3ag** ( $\text{CDCl}_3$ , 400MHz)

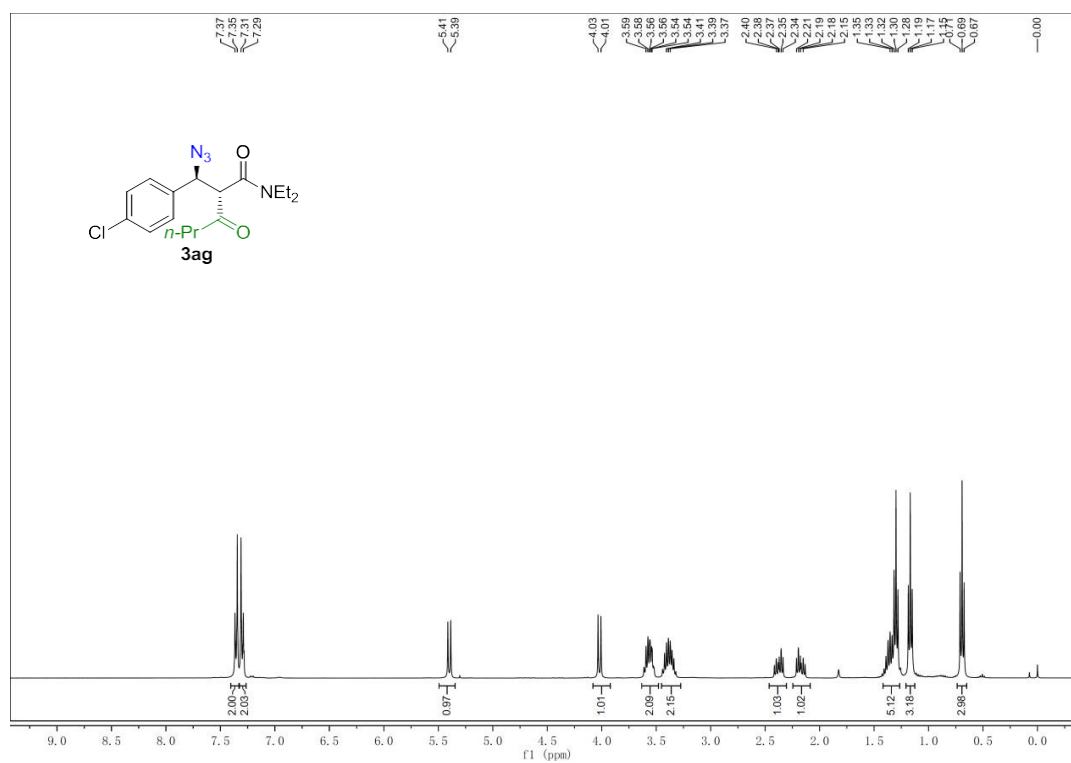

$^{13}\text{C}$  NMR spectrum of compound **3ag** ( $\text{CDCl}_3$ , 100MHz)

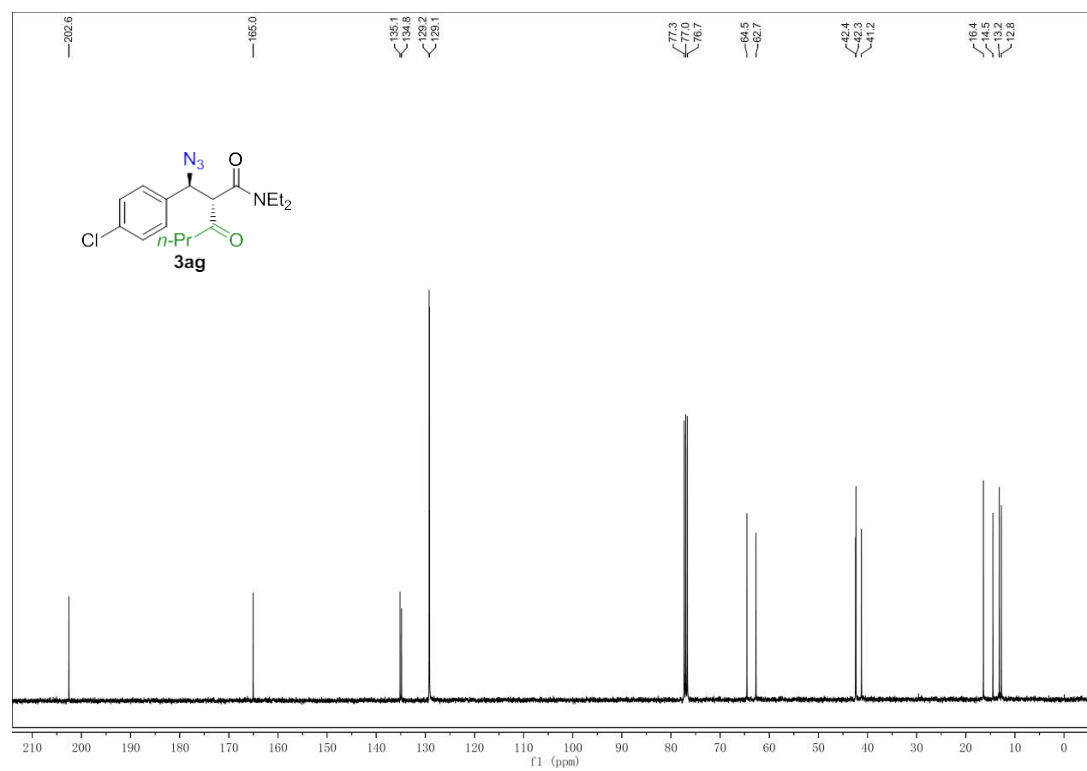

$^1\text{H}$  NMR spectrum of compound **3ah** ( $\text{CDCl}_3$ , 400MHz)

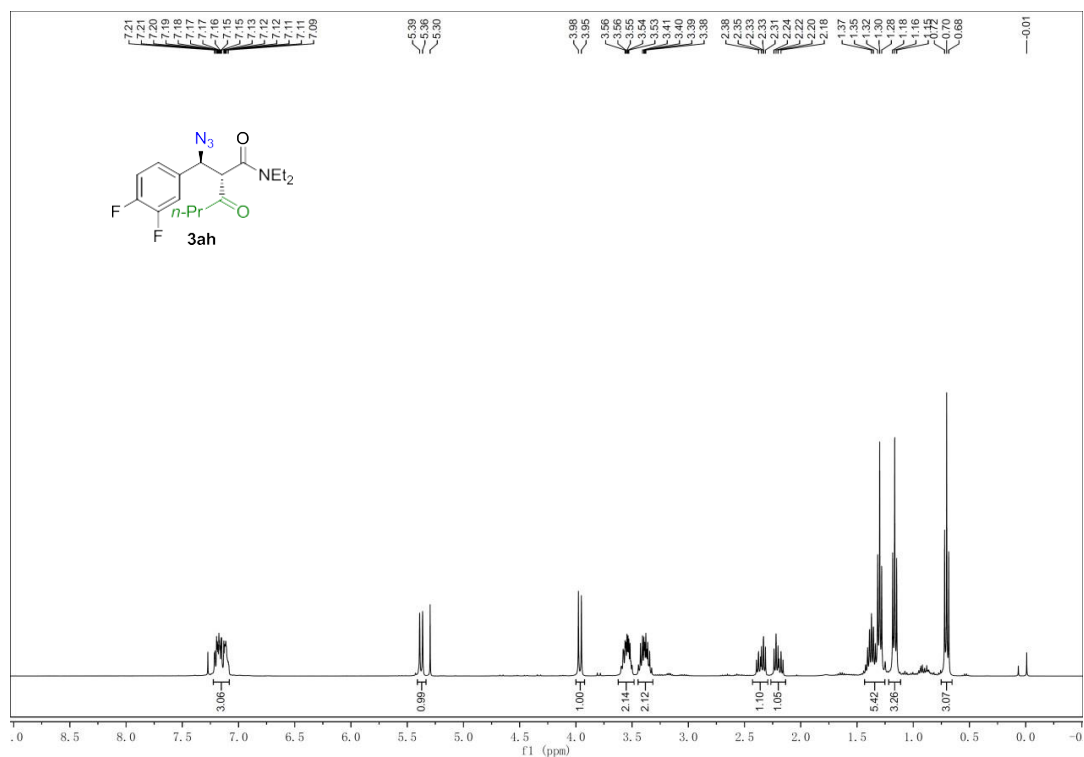

$^{13}\text{C}$  NMR spectrum of compound **3ah** ( $\text{CDCl}_3$ , 100MHz)

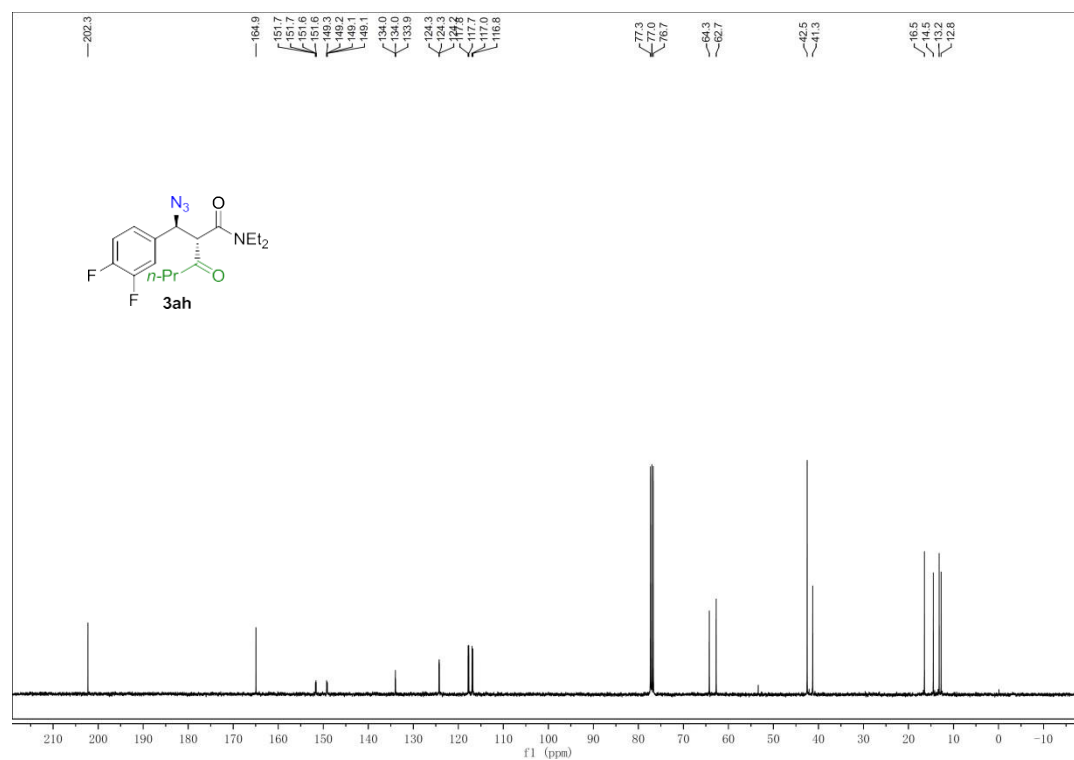

$^1\text{H}$  NMR spectrum of compound **3ai** ( $\text{CDCl}_3$ , 400MHz)

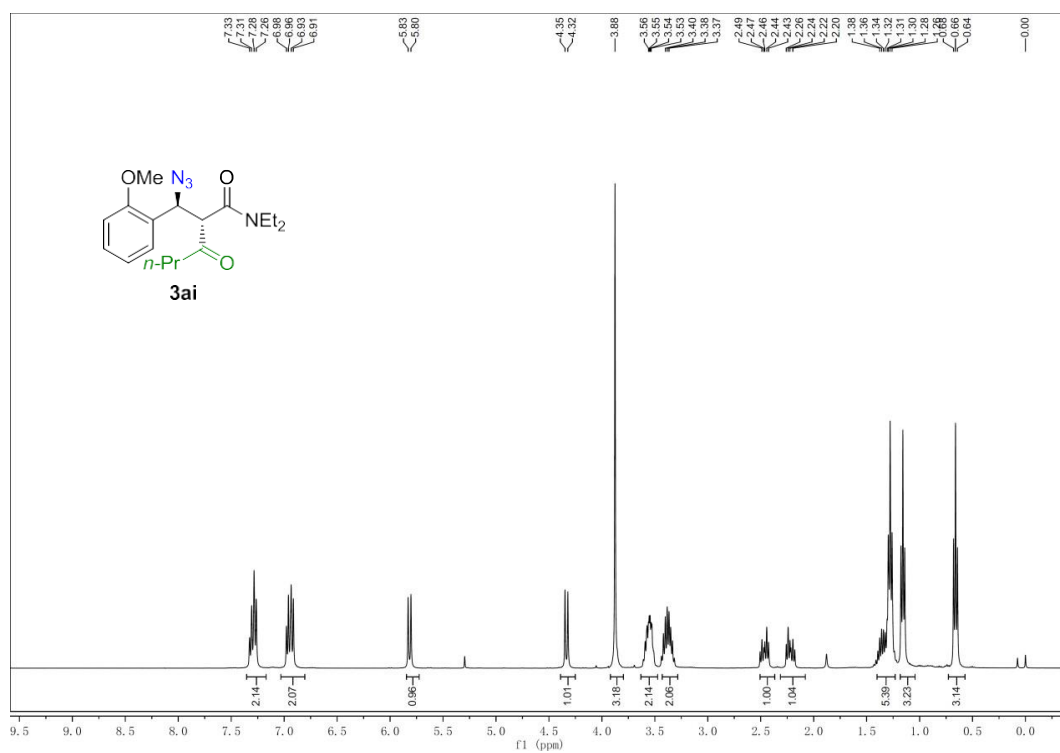

$^{13}\text{C}$  NMR spectrum of compound **3ai** ( $\text{CDCl}_3$ , 100MHz)

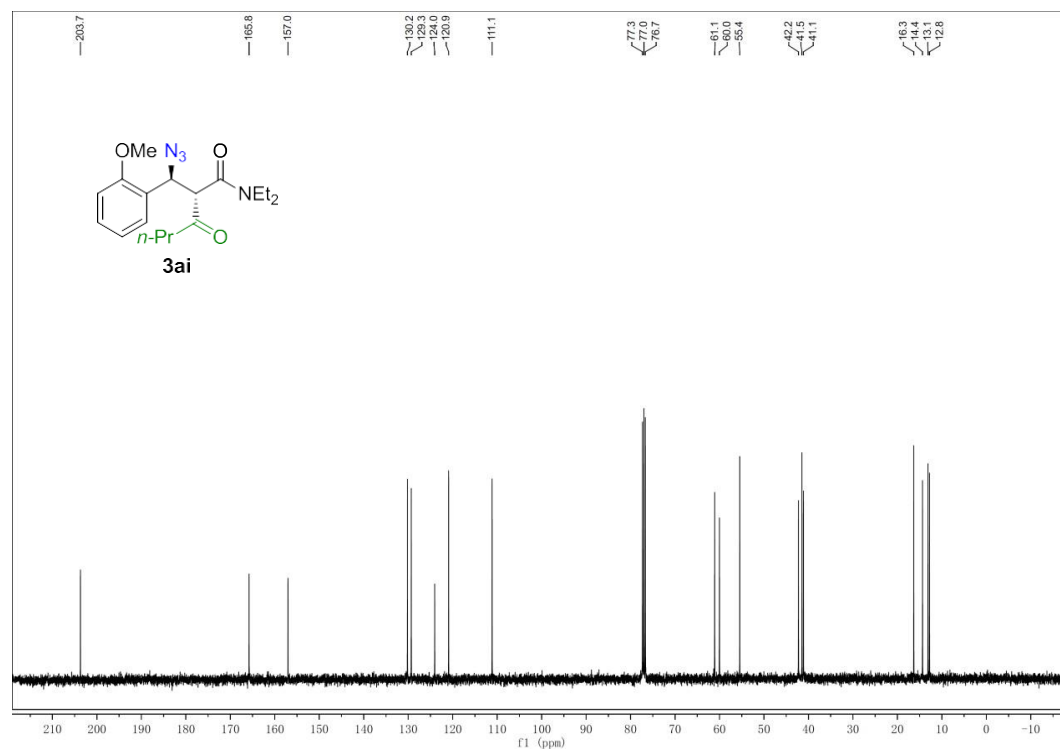

$^1\text{H}$  NMR spectrum of compound **3aj** ( $\text{CDCl}_3$ , 400MHz)

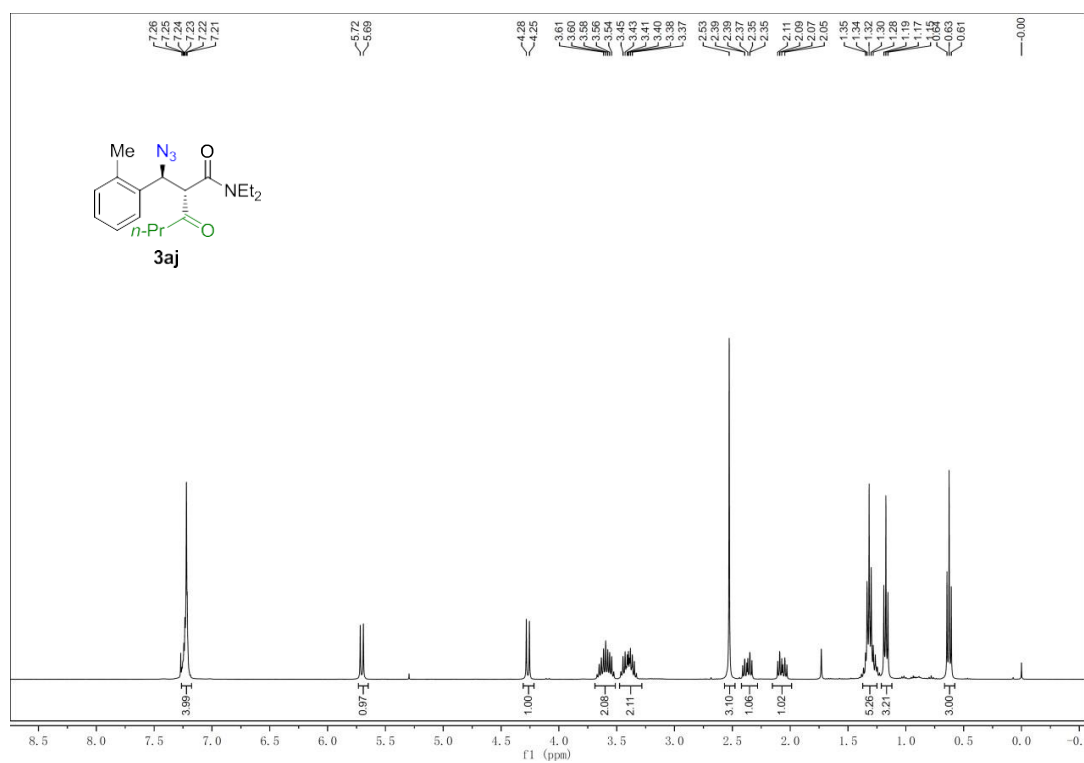

$^{13}\text{C}$  NMR spectrum of compound **3aj** ( $\text{CDCl}_3$ , 100MHz)

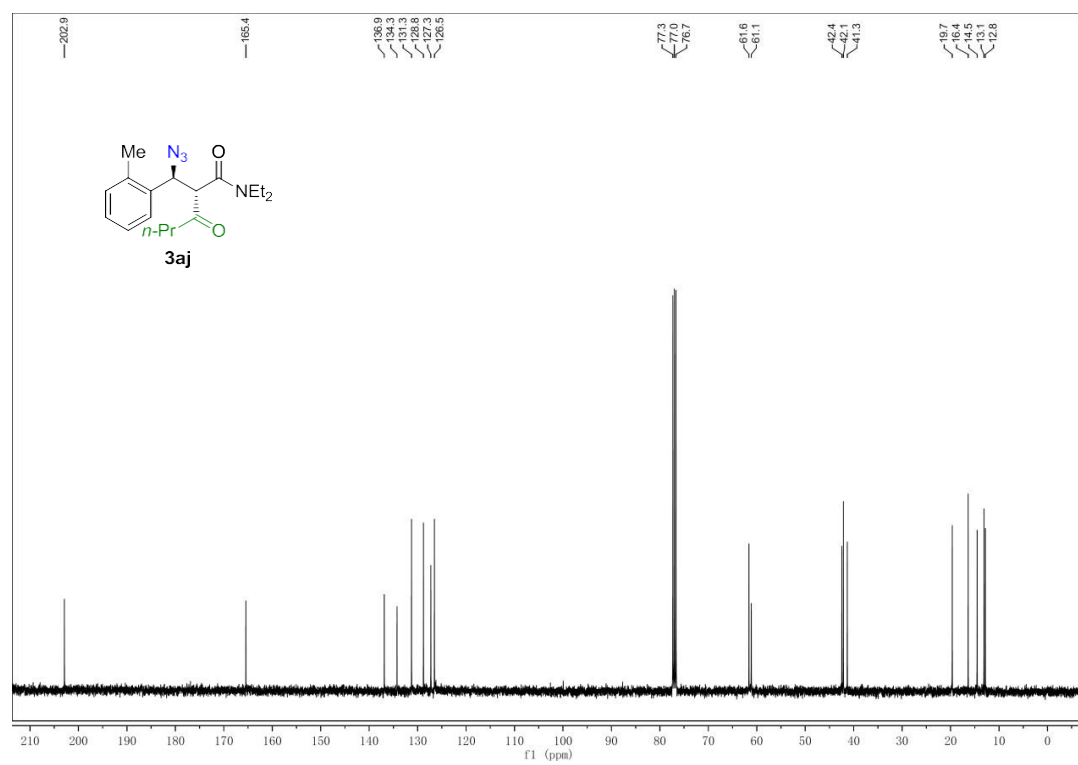

$^1\text{H}$  NMR spectrum of compound **3ak** ( $\text{CDCl}_3$ , 400MHz)

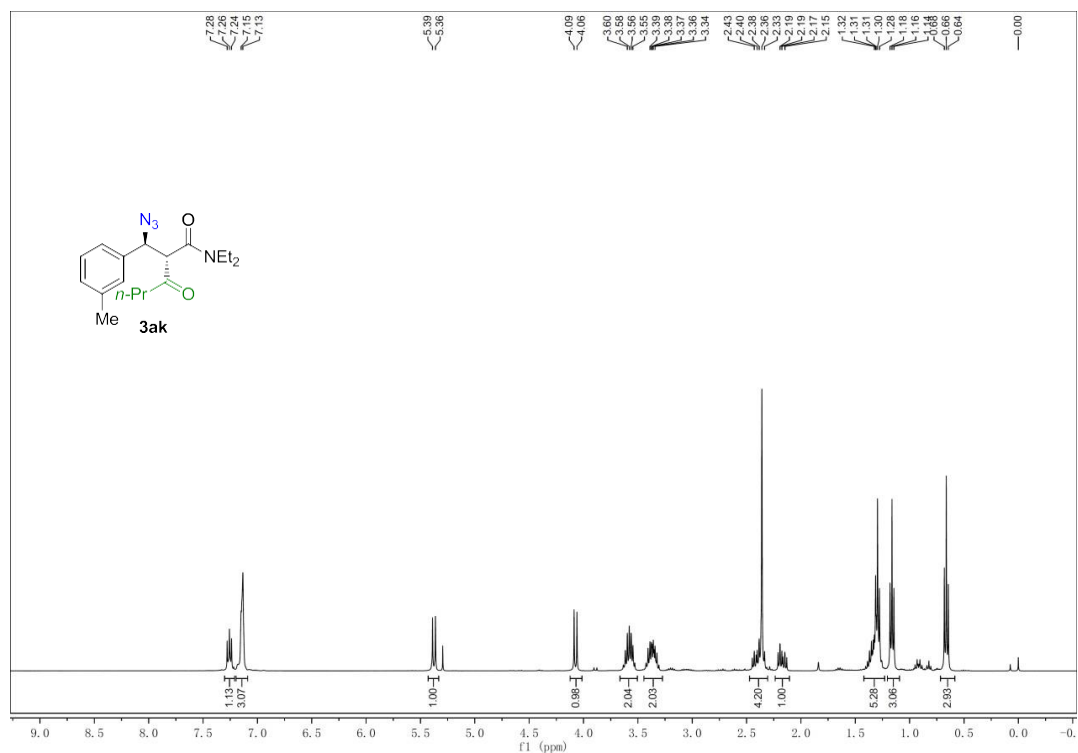

$^{13}\text{C}$  NMR spectrum of compound **3ak** ( $\text{CDCl}_3$ , 100MHz)

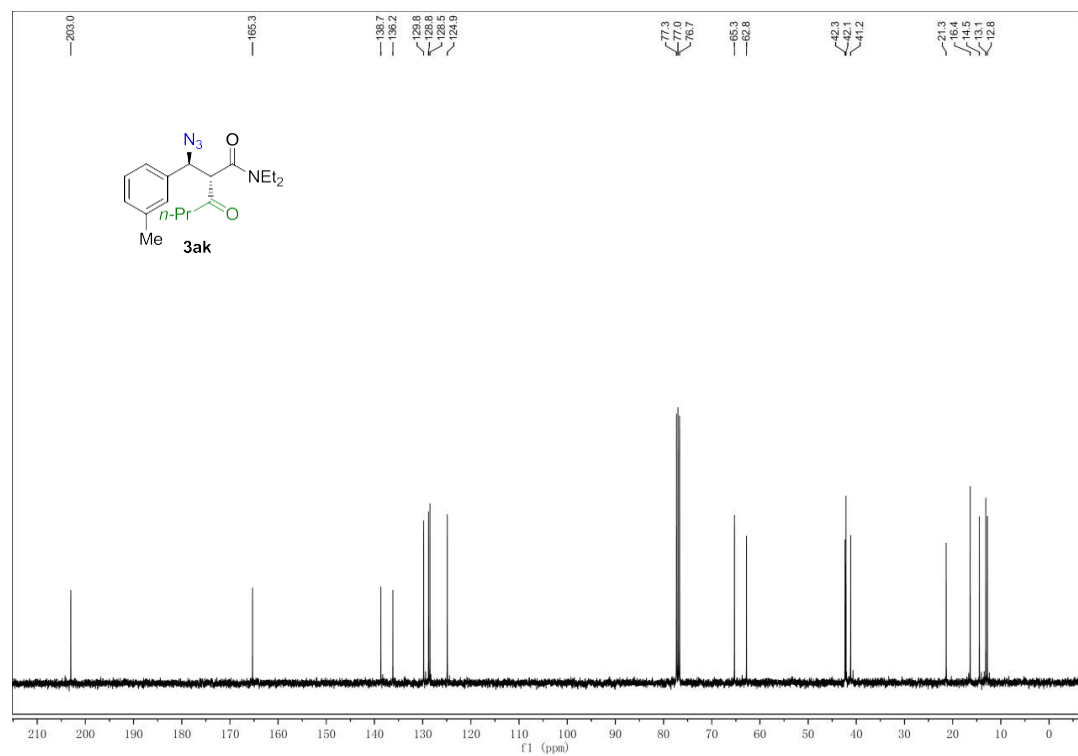

$^1\text{H}$  NMR spectrum of compound **3al** ( $\text{CDCl}_3$ , 400MHz)

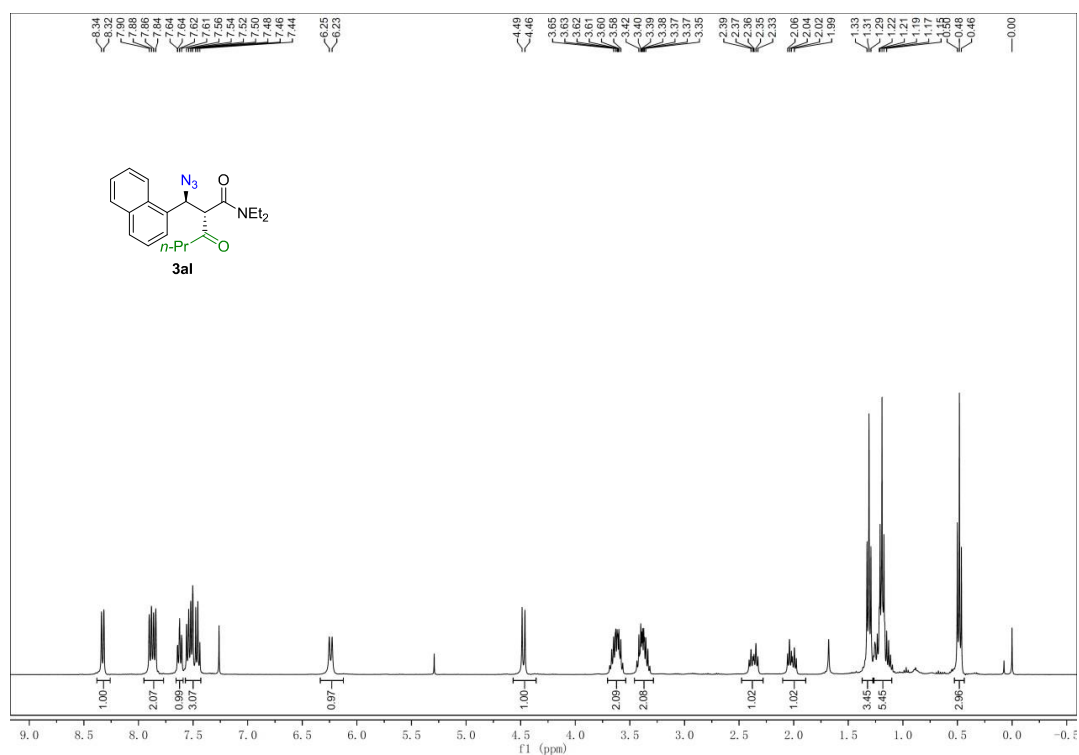

$^{13}\text{C}$  NMR spectrum of compound **3al** ( $\text{CDCl}_3$ , 100MHz)

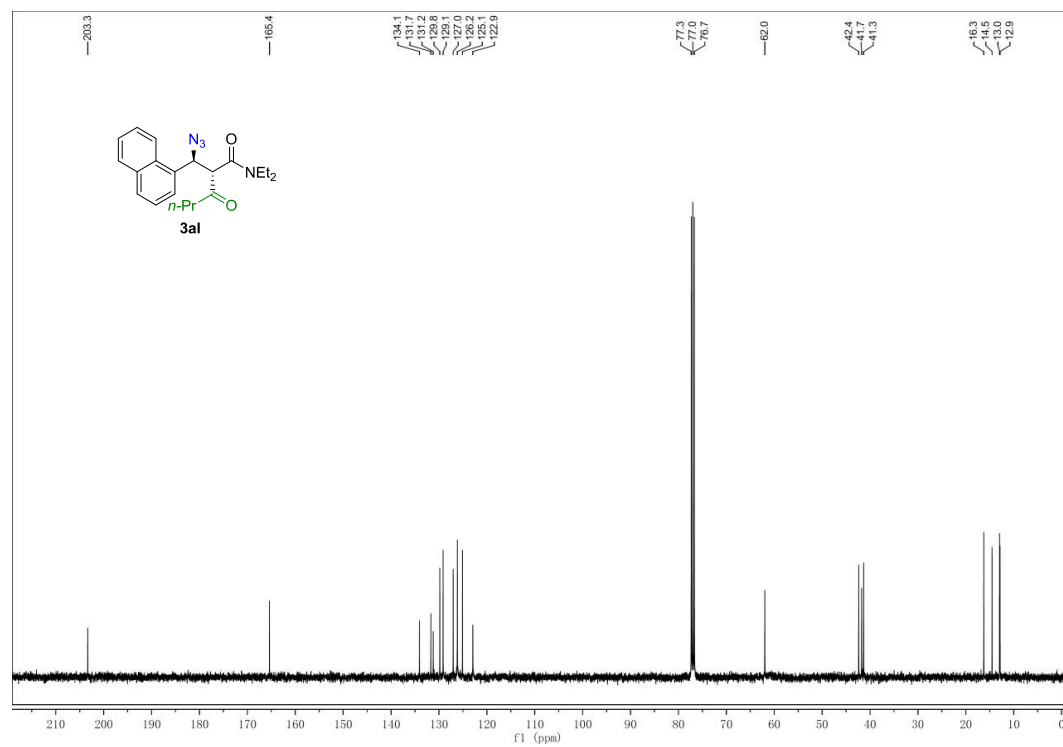

$^1\text{H}$  NMR spectrum of compound **3am** ( $\text{CDCl}_3$ , 400MHz)

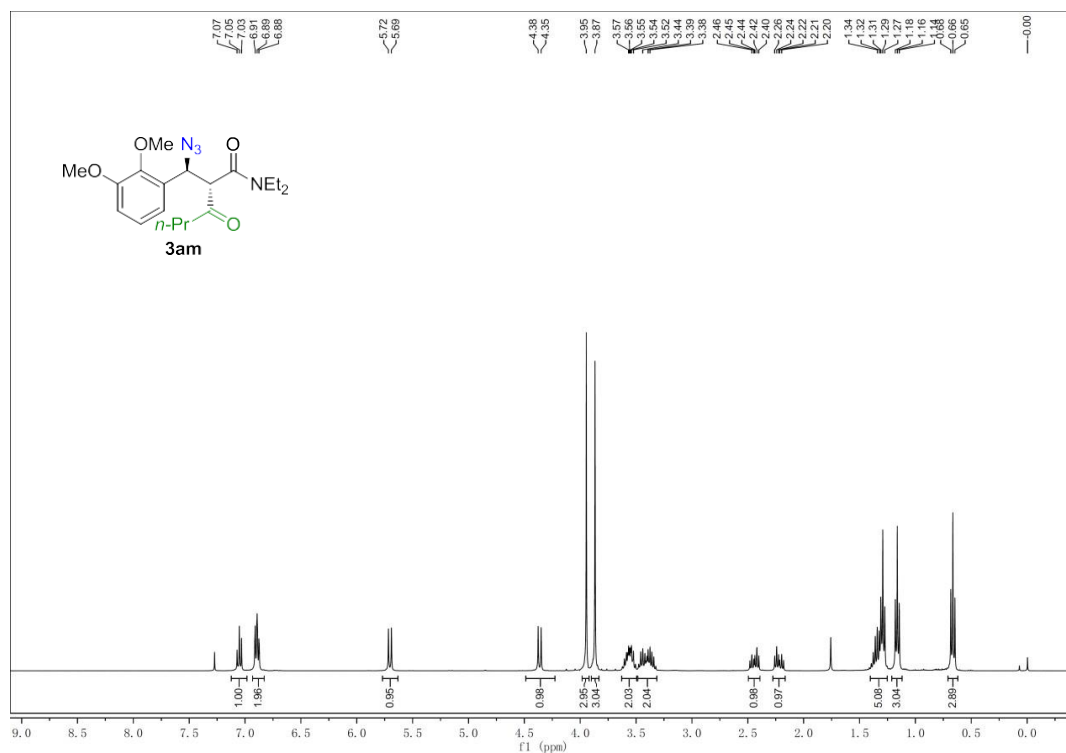

$^{13}\text{C}$  NMR spectrum of compound **3am** ( $\text{CDCl}_3$ , 100MHz)

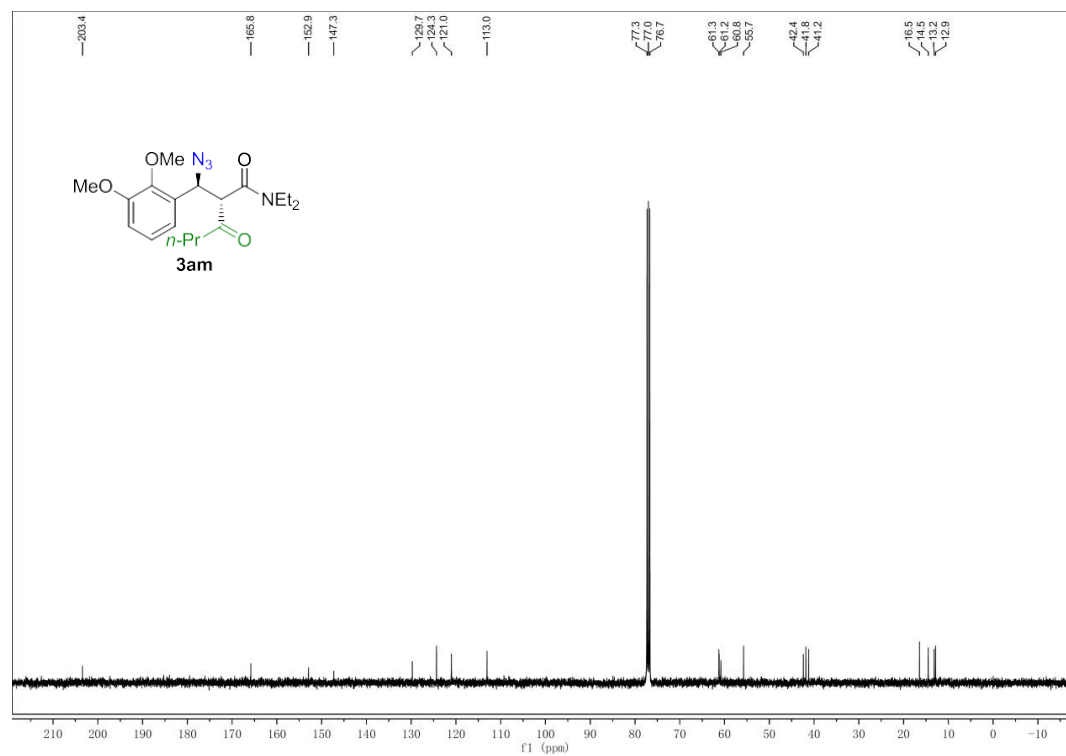



$^1\text{H}$  NMR spectrum of compound **3an** ( $\text{CDCl}_3$ , 400MHz)

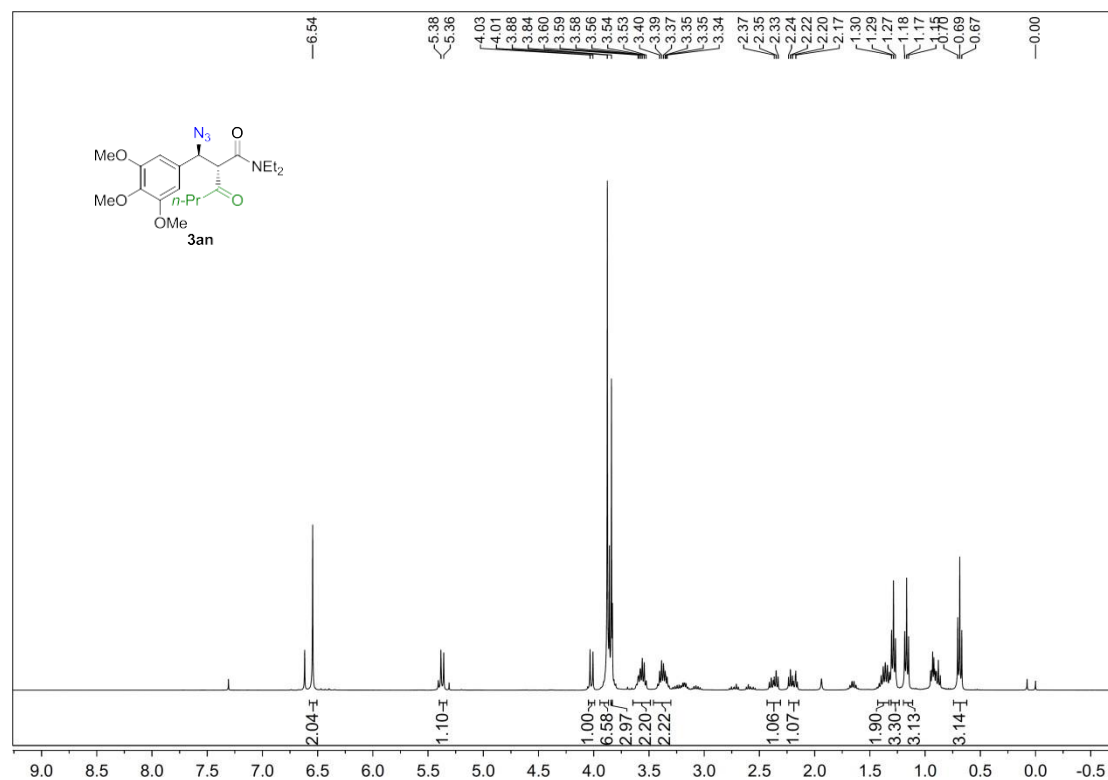

$^{13}\text{C}$  NMR spectrum of compound **3an** ( $\text{CDCl}_3$ , 100MHz)

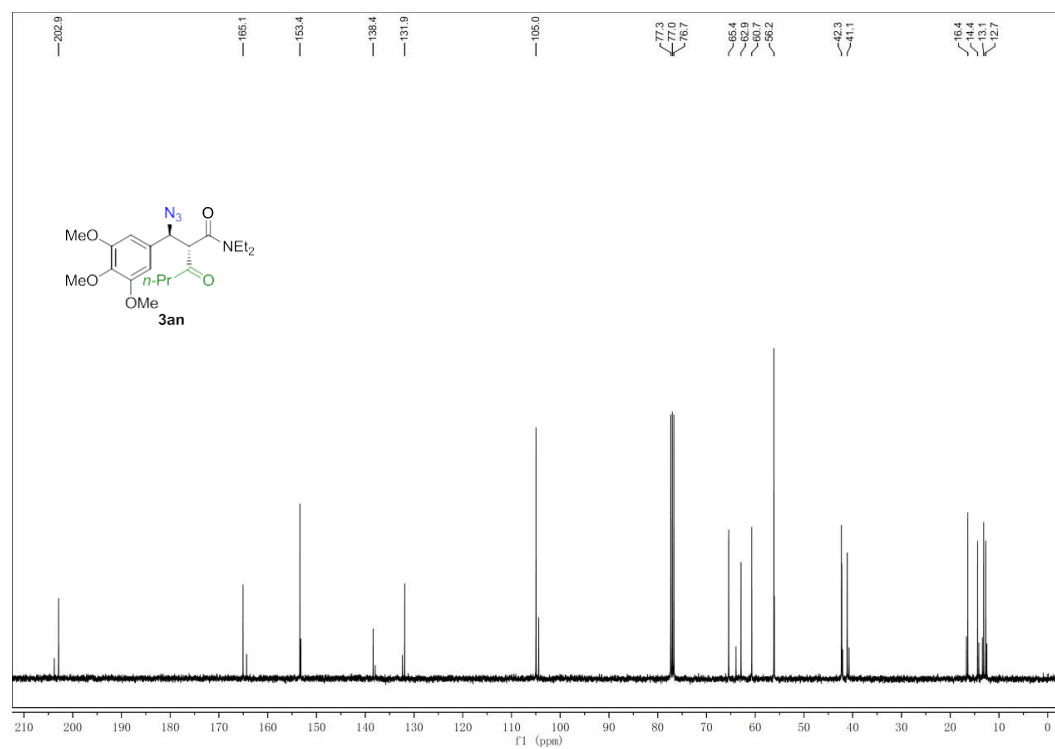

$^1\text{H}$  NMR spectrum of compound **4a** ( $\text{CDCl}_3$ , 400MHz)

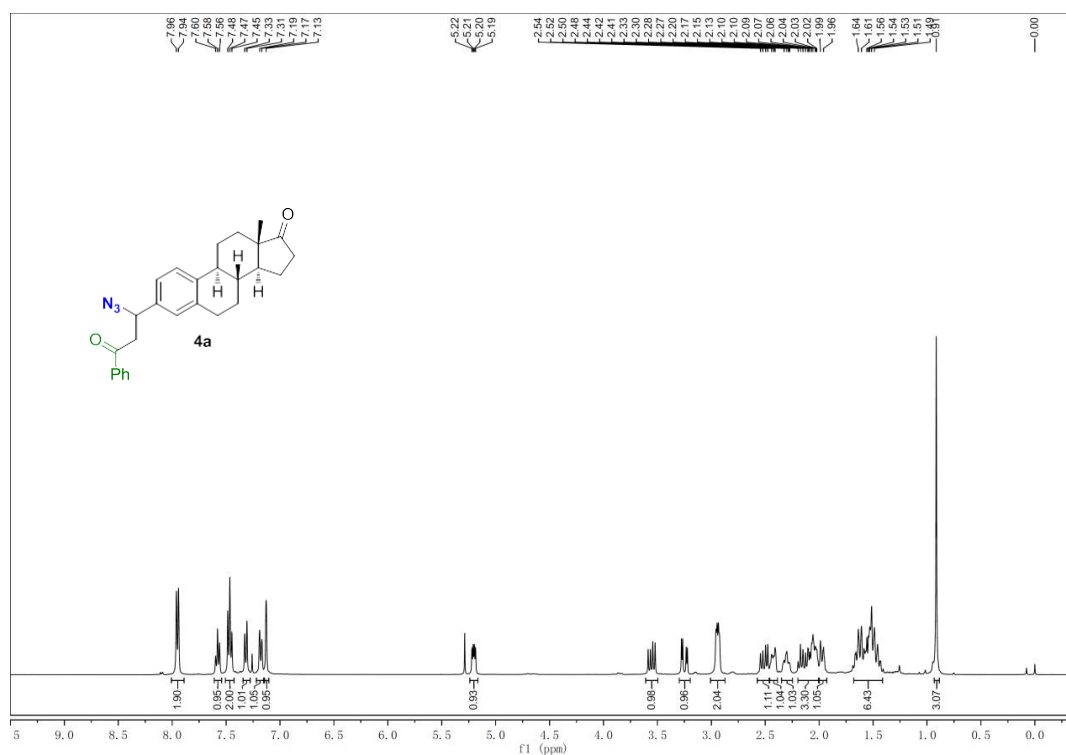

$^{13}\text{C}$  NMR spectrum of compound **4a** ( $\text{CDCl}_3$ , 100MHz)

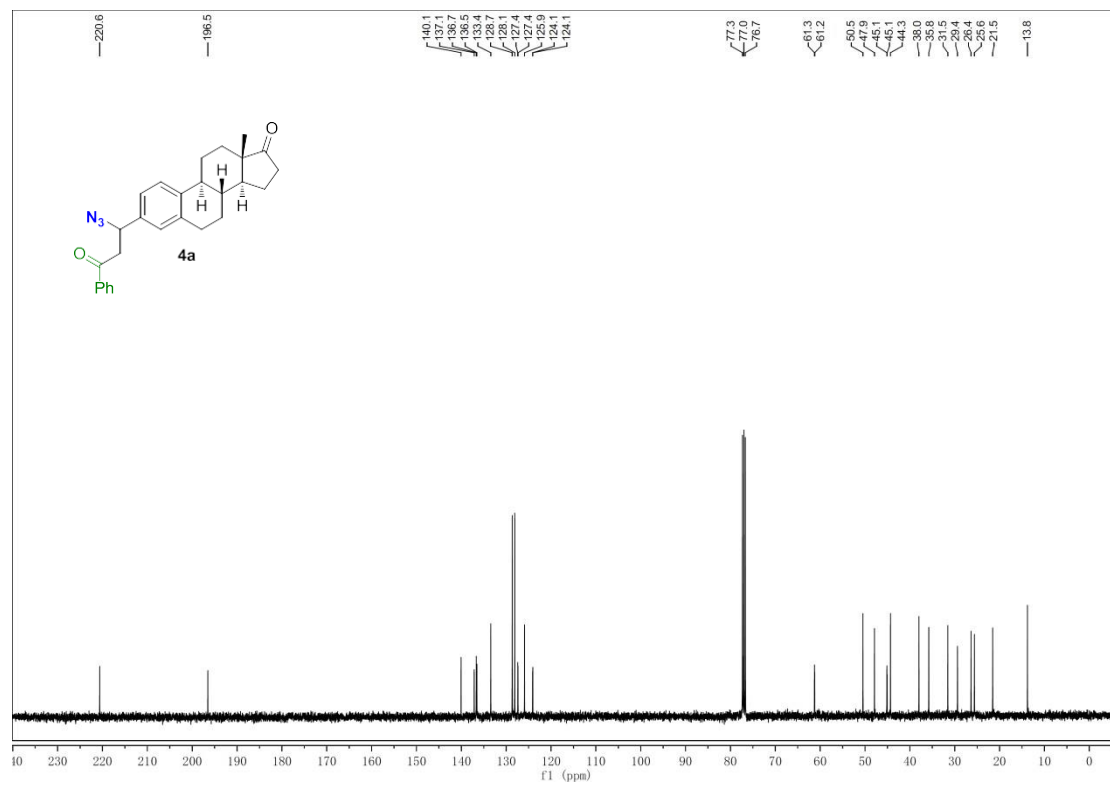

[illegible]

Chemical structure of **4b** is shown above the spectrum. The structure features a steroid core with a ketone at C-3, a phenyl group at C-14, and an azide group at C-15. The azide group is labeled  $N_3$  in blue. The phenyl group is labeled  $n-Pr$  in green. The spectrum displays peaks corresponding to the structure, with the following chemical shifts (ppm) labeled above the peaks:

220.6, 201.5, 170.5, 165.1, 148.4, 139.0, 137.9, 136.3, 129.0, 128.9, 126.3, 121.3, 118.4, 77.3, 77.0, 76.7, 64.7, 64.2, 59.4, 50.4, 47.9, 47.7, 46.1, 42.8, 37.9, 37.8, 35.8, 33.3, 29.3, 28.3, 26.7, 24.9, 21.5, 16.2, 13.5, 13.0.

$^1\text{H}$  NMR spectrum of compound **5a** ( $\text{CDCl}_3$ , 400MHz)

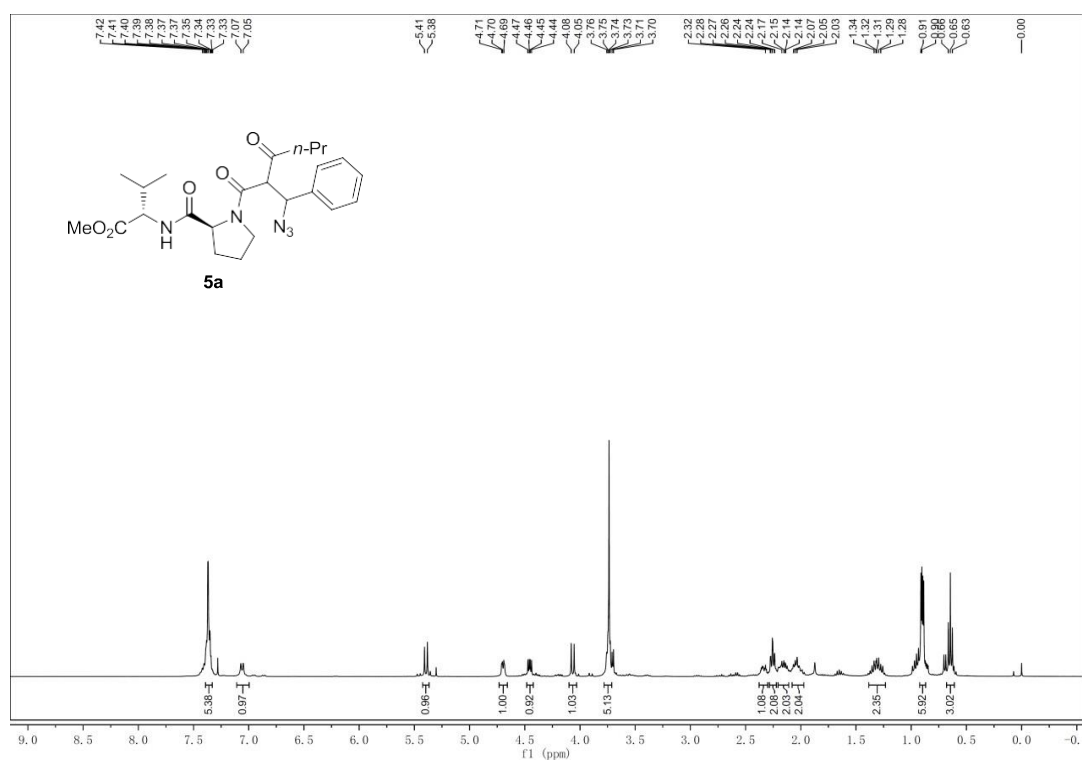

$^{13}\text{C}$  NMR spectrum of compound **5a** ( $\text{CDCl}_3$ , 100MHz)

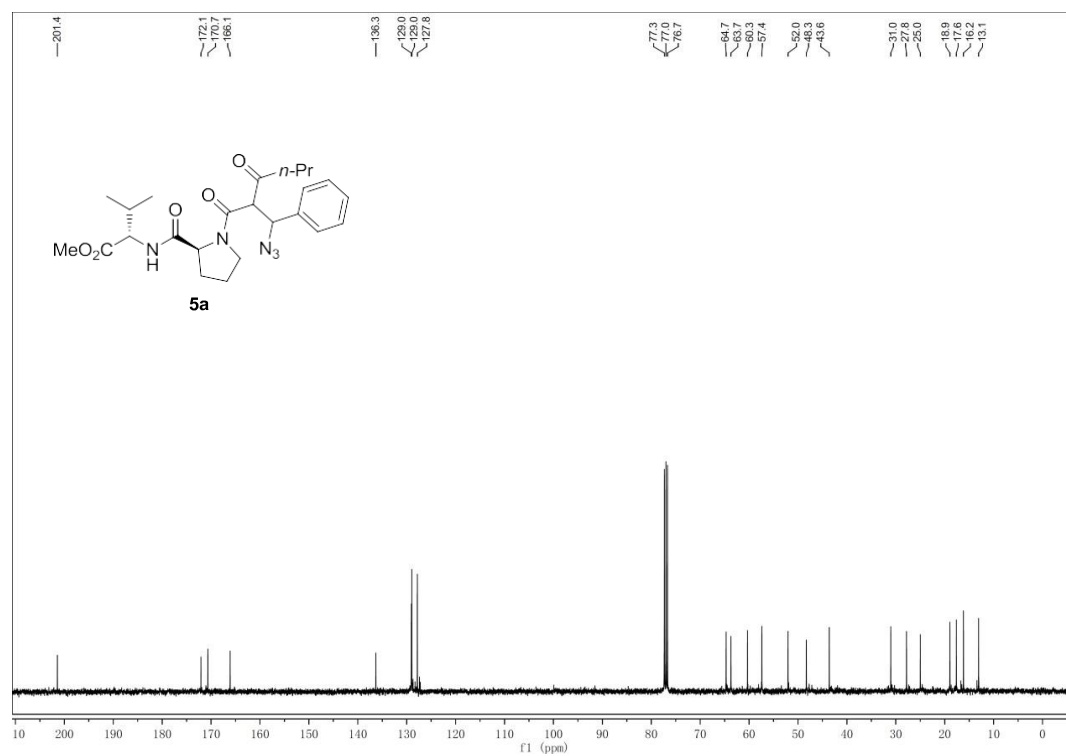

$^1\text{H}$  NMR spectrum of compound **5b** ( $\text{CDCl}_3$ , 400MHz)

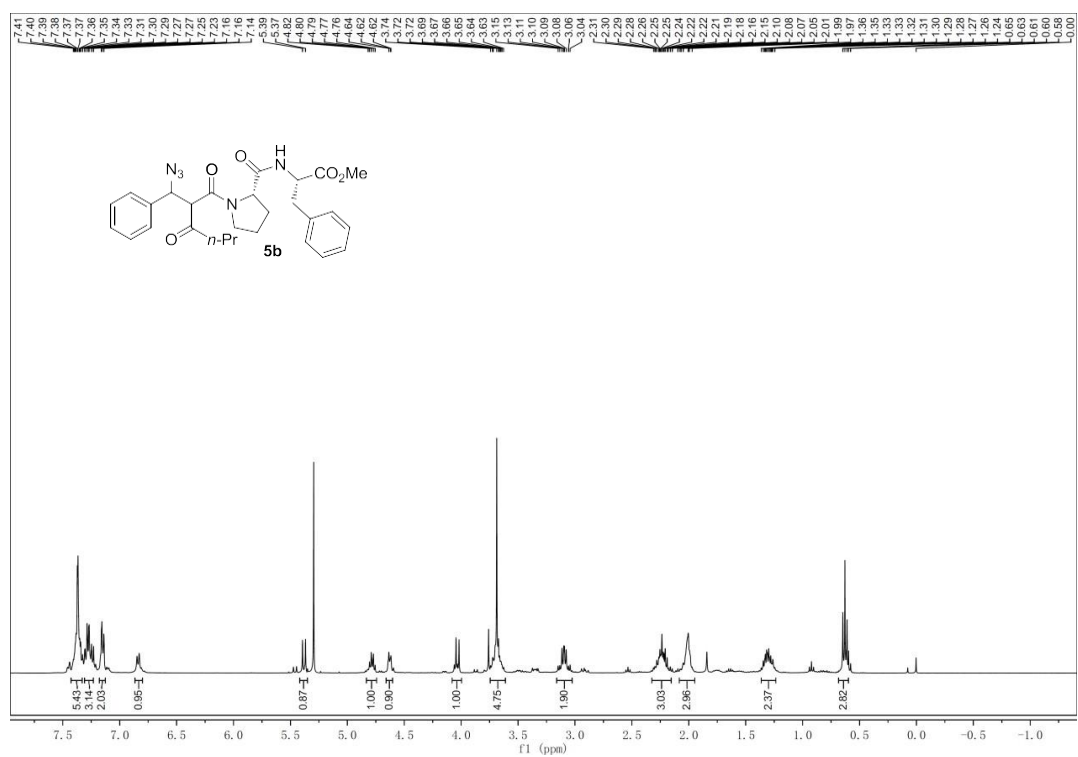

$^{13}\text{C}$  NMR spectrum of compound **5b** ( $\text{CDCl}_3$ , 100MHz)

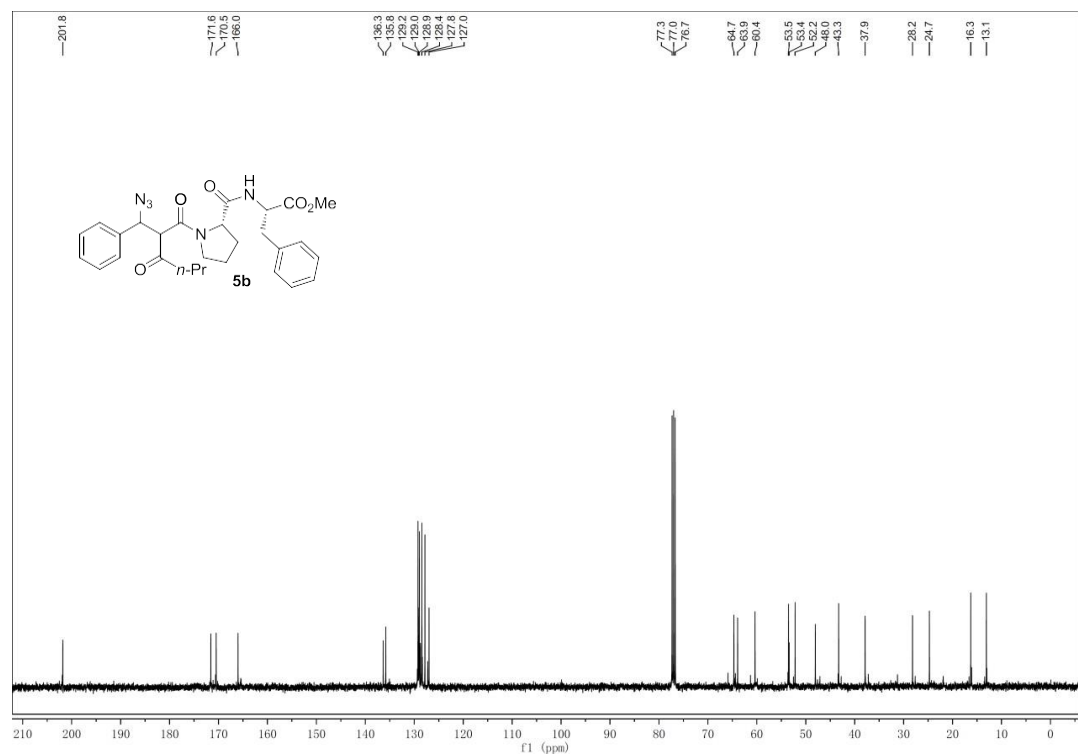

$^1\text{H}$  NMR spectrum of compound **9** ( $\text{CDCl}_3$ , 400MHz)

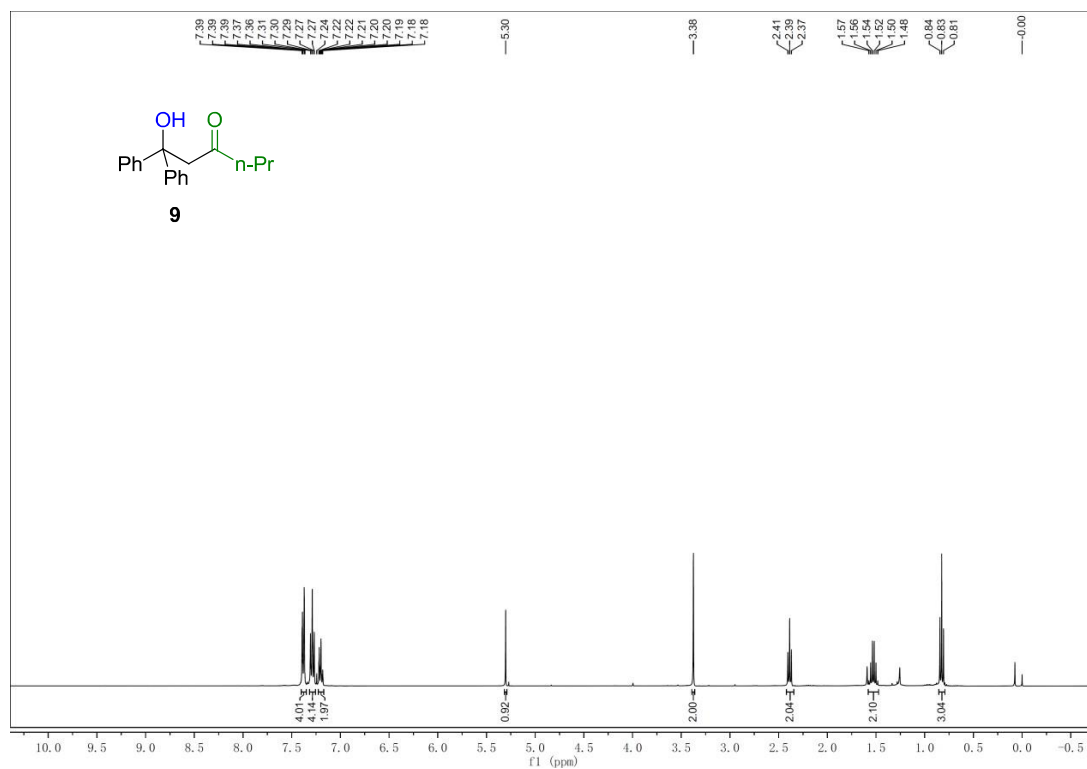

$^{13}\text{C}$  NMR spectrum of compound **9** ( $\text{CDCl}_3$ , 100MHz)

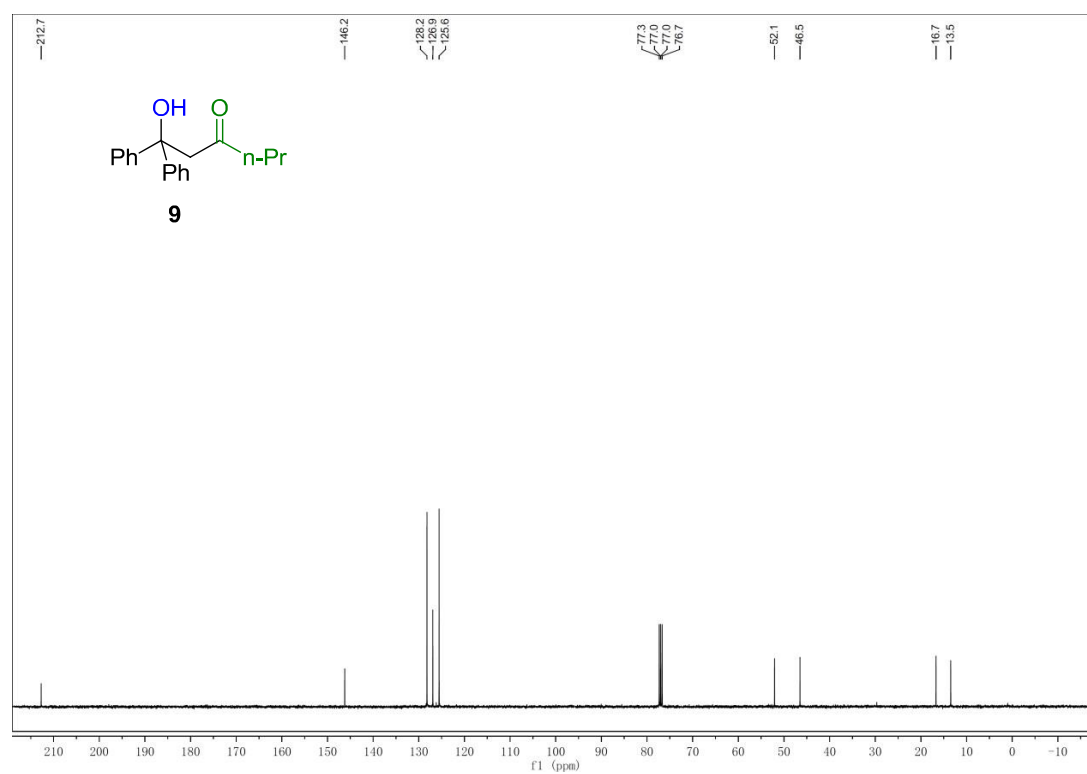

## HPLC trace of **3a**

HPLC spectrum of racemic compound **3a**: IC column, hexane: *i*-PrOH = 99:1, 0.5 mL/min;

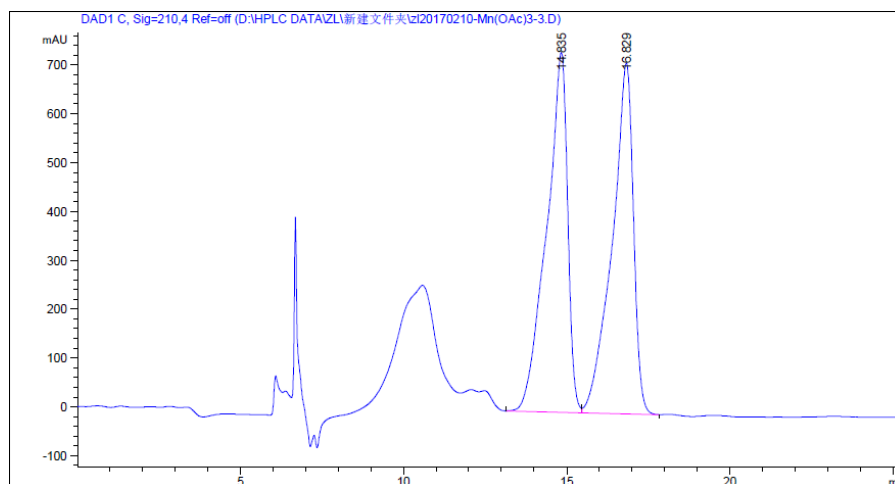

| 峰 # | 保留时间 [min] | 类型 | 峰宽 [min] | 峰面积 [mAU*s] | 峰高 [mAU]  | 峰面积 %   |
|-----|------------|----|----------|-------------|-----------|---------|
| 1   | 14.835     | BV | 0.6256   | 3.29110e4   | 736.17560 | 50.2739 |
| 2   | 16.829     | VB | 0.6449   | 3.25525e4   | 718.07111 | 49.7261 |

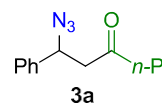

总量 : 6.54635e4 1454.24670

HPLC spectrum of chiral compound **3a**, minor enantiomer  $t = 16.3$  min, major enantiomer  $t = 14.4$  min.)

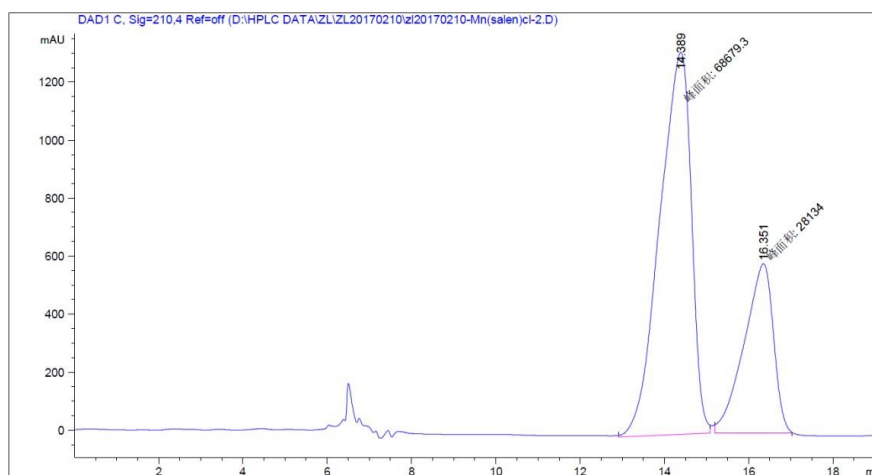

| 峰 # | 保留时间 [min] | 类型 | 峰宽 [min] | 峰面积 [mAU*s] | 峰高 [mAU]   | 峰面积 %   |
|-----|------------|----|----------|-------------|------------|---------|
| 1   | 14.389     | MM | 0.8696   | 6.86793e4   | 1316.23926 | 70.9399 |
| 2   | 16.351     | MM | 0.8041   | 2.81340e4   | 583.10663  | 29.0601 |

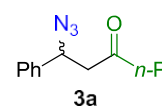

总量 : 9.68133e4 1899.34589

HPLC spectrum of racemic compound **3d** (IC column, hexane: i-PrOH = 99:1, 0.5 mL/min)

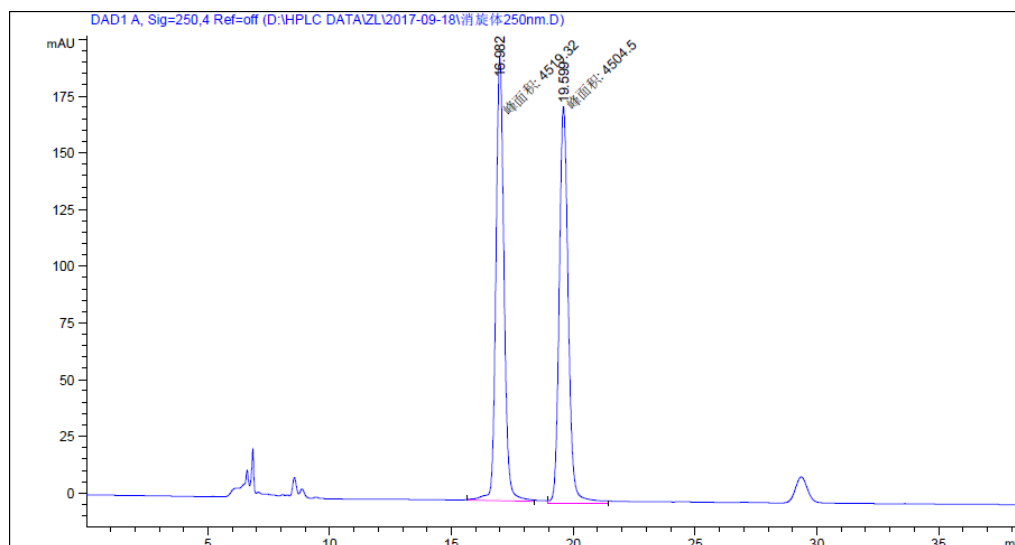

| 峰 # | 保留时间 [min] | 类型 | 峰宽 [min] | 峰面积 [mAU*s] | 峰高 [mAU]  | 峰面积 %   |
|-----|------------|----|----------|-------------|-----------|---------|
| 1   | 16.982     | MM | 0.3857   | 4519.31592  | 195.27078 | 50.0821 |
| 2   | 19.599     | MM | 0.4298   | 4504.49902  | 174.66217 | 49.9179 |

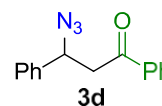

总量 : 9023.81494 369.93295

HPLC spectrum of chiral compound **3d** (IC column, hexane: i-PrOH = 99:1, 0.5 mL/min)

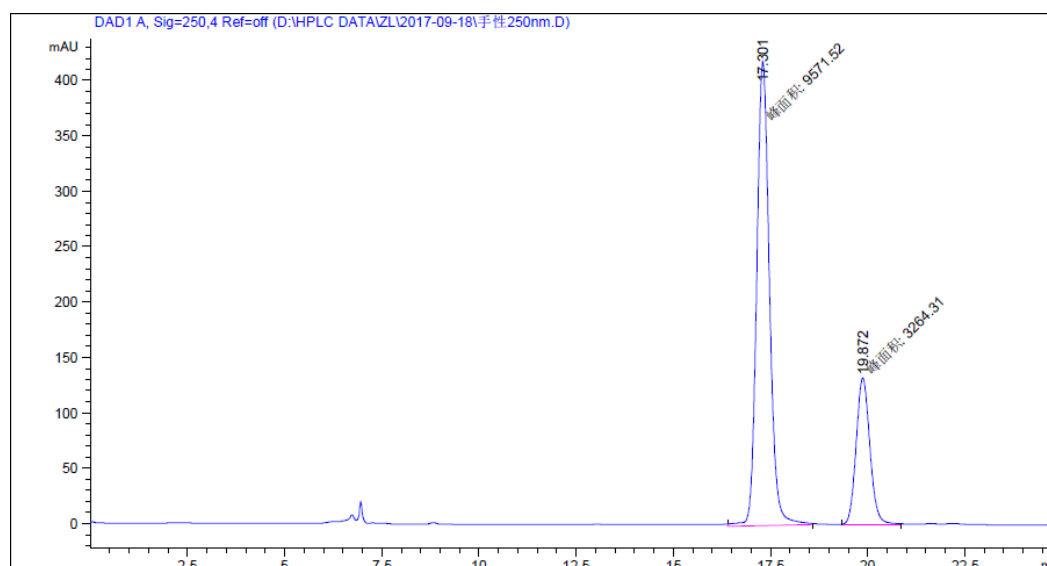

| 峰 # | 保留时间 [min] | 类型 | 峰宽 [min] | 峰面积 [mAU*s] | 峰高 [mAU]  | 峰面积 %   |
|-----|------------|----|----------|-------------|-----------|---------|
| 1   | 17.301     | MM | 0.3807   | 9571.51660  | 419.02264 | 74.5687 |
| 2   | 19.872     | MM | 0.4105   | 3264.31226  | 132.52913 | 25.4313 |

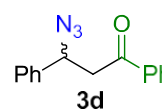

总量 : 1.28358e4 551.55177



## 9. References

1. Chatalova-Sazepi, C., Wang, Q., Sammis, G. M., Zhu, J. Copper-Catalyzed Intermolecular Carboetherification of Unactivated Alkenes by Alkyl Nitriles and Alcohols. *Angew. Chem. Int. Ed.* **54**, 5443–5446 (2015).
2. Nimse, S. B., Pal, D., Mazumder, A., Mazumder, R. Synthesis of Cinnamanilide Derivatives and Their Antioxidant and Antimicrobial Activity. *Journal of Chemistry*. **2015**, Article ID 208910, 5 pages.
3. Sanchez-Moreno, C. Review: Methods Used to Evaluate the Free Radical Scavenging Activity in Foods and Biological Systems. *Food Science and Technology International* **8**, 121–137 (2002).
4. Wang, T.-C., Chen, Y.-L., Lee, K.-H., Tzeng, C.-C. Lewis Acid Catalyzed Reaction of Cinnamanilides: Competition of Intramolecular and Intermolecular Friedel-Crafts Reaction. *Synthesis* **1997**, *1*, 87–90 (1997).
5. Furuya, T., Strom, A. E., Ritter, T. Silver-Mediated Fluorination of Functionalized Aryl Stannanes. *J. Am. Chem. Soc.* **131**, 1662–1663 (2009).
6. Straathof, N. J. W., Cramer, S. E., Hessel, V., Noel, T., *Practical Photocatalytic Trifluoromethylation and Hydrotrifluoromethylation of Styrenes in Batch and Flow*. *Angew. Chem. Int. Ed.* **55**, 15549–15553 (2016).
7. Liao, S., List, B. Asymmetric Counteranion-Directed Transition-Metal Catalysis: Enantioselective Epoxidation of Alkenes with Manganese(III) Salen Phosphate Complexes. *Angew. Chem. Int. Ed.* **49**, 628–631 (2010).
8. Xi, X., Shao, J., Hu, X., Wu, Y. Structure and asymmetric epoxidation reactivity of chiral Mn(III) salen catalysts modified by different axial anions. *RSC Adv.* **5**, 80772–80778 (2015).
9. Lee, K. N., Lei, Z., Ngai, M.-Y.  $\beta$ -Selective Reductive Coupling of Alkenylpyridines with Aldehydes and Imines via Synergistic Lewis Acid/Photoredox Catalysis. *J. Am. Chem. Soc.* **139**, 5003–5006 (2017).
10. Nandy, J. P., Prabhakaran, E. N., Kumar, S. K., Kunwar, A. C., Iqbal, J. Reverse Turn Induced  $\pi$ -Facial Selectivity during Polyaniline-Supported Cobalt(II) Salen Catalyzed Aerobic Epoxidation of N-Cinnamoyl L-Proline Derived Peptides. *J. Org. Chem.* **68**, 1679–1692 (2003).
11. Zhang, H.-B., Wang, Y., Gu, Y., Xu, P.-F. Lewis- and Brønsted -acid cooperative catalytic radical coupling of aldehydes and azodicarboxylate. *RSC Adv.* **4**, 27796–27799 (2014).
